# Supplementary material
Source: PubMed Central journal article supplement (PMC7855255)

## Supporting Information – Table of Contents

|                                                                       |            |
|-----------------------------------------------------------------------|------------|
| <b>Materials and Methods .....</b>                                    | <b>S2</b>  |
| <b>Experimental Procedures .....</b>                                  | <b>S4</b>  |
| <b>A. Syntheses of Amide Substrates.....</b>                          | <b>S4</b>  |
| <b>B. Relevant Control Experiments.....</b>                           | <b>S8</b>  |
| <b>C. General Procedures for Methodology .....</b>                    | <b>S9</b>  |
| <b>D. Scope of Amide Substrates .....</b>                             | <b>S11</b> |
| <b>E. Scope of Boronate Ester Nucleophiles .....</b>                  | <b>S19</b> |
| <b>F. Syntheses of Alcohols 40 and 43 .....</b>                       | <b>S26</b> |
| <b>G. Syntheses of Authentic Samples for Alcohols 13 and 37 .....</b> | <b>S27</b> |
| <b>H. Robustness Screen .....</b>                                     | <b>S30</b> |
| <b>I. Benchtop Variants of Methodology .....</b>                      | <b>S31</b> |
| <b>J. Enantioselectivity Experiments.....</b>                         | <b>S33</b> |
| <b>K. Verification of Enantioenrichment.....</b>                      | <b>S34</b> |
| <b>L. Deuterium Incorporation Experiments.....</b>                    | <b>S36</b> |
| <br>                                                                  |            |
| <b>References.....</b>                                                | <b>S38</b> |
| <br>                                                                  |            |
| <b><sup>1</sup>H NMR Spectra .....</b>                                | <b>S40</b> |
| <b><sup>13</sup>C NMR Spectra.....</b>                                | <b>S73</b> |

**Materials and Methods.** Unless stated otherwise, reactions were conducted in flame-dried glassware under an atmosphere of nitrogen or argon and commercially obtained reagents were used as received. Amide substrates were synthesized following protocols specified in Section A in the Experimental Procedures. Alcohol **7** was prepared according to literature procedure.<sup>1</sup> Boronate esters **5**, **59–61**, **63–65**, **67** and **68** were obtained from Combi-Blocks. Boronate ester **6** was obtained from TCI Chemicals. Boronate ester **39** was obtained from AK Scientific. Boronate esters **62** and **66** were prepared according to literature procedure.<sup>2</sup> Ni(cod)<sub>2</sub> and Benz-ICy•HCl (**2**) were obtained from Strem Chemicals. [(TMEDA)Ni(*o*-tolyl)Cl] was prepared according to literature procedure.<sup>3</sup> Ligand A (**71**) was prepared according to literature procedure.<sup>4</sup> Potassium phosphate (K<sub>3</sub>PO<sub>4</sub>) was obtained from Acros. 1,4-dioxane was obtained from Fisher Scientific and purified by distillation over sodium metal degassed by sparging with N<sub>2</sub> for 1 h. Paraffin wax (mp 53–57 °C ASTM D 87) was obtained from Sigma-Aldrich and used as received). 1,3,5-trimethoxybenzene was obtained from Alfa Aesar and used as received. Reaction temperatures were controlled using an IKA Mag temperature modulator, and unless stated otherwise, reactions were performed at room temperature (approximately 23 °C). Thin-layer chromatography (TLC) was conducted with EMD gel 60 F254 pre-coated plates (0.25 mm for analytical chromatography and 0.50 mm for preparative chromatography) and visualized using a combination of UV, anisaldehyde, iodine, and potassium permanganate staining techniques. Silicycle Siliaflash P60 (particle size 0.040–0.063 mm) was used for flash column chromatography. <sup>1</sup>H NMR spectra were recorded on Bruker spectrometers (400, 500, and 600 MHz were allowed for our provided spectra) and are reported relative to residual solvent signals. Data for <sup>1</sup>H NMR spectra are reported as follows: chemical shift (δ ppm), multiplicity, coupling constant (Hz), integration. Data for <sup>13</sup>C NMR are reported in terms of chemical shift (at 125 MHz). IR spectra were recorded on a Perkin-Elmer UATR Two FT-IR spectrometer and are reported in terms of frequency absorption (cm<sup>-1</sup>). DART-MS spectra were collected on a Thermo Exactive Plus MSD (Thermo Scientific) equipped with an ID-CUBE ion source and a Vapur Interface (IonSense Inc.). Both the source and MSD were controlled by Excalibur software v. 3.0. The analyte was spotted onto OpenSpot sampling cards (IonSense Inc.) using CHCl<sub>3</sub> or CH<sub>2</sub>Cl<sub>2</sub> as the solvent. Ionization was accomplished using UHP He plasma with no additional ionization agents. The mass calibration was carried out using Pierce LTQ Velos ESI (+) and (-) Ion calibration solutions (Thermo Fisher Scientific). Determination of enantiopurity was carried out on a Mettler

Toledo SFC (supercritical fluid chromatography) using Daicel ChiralPak AD–H column. Data for SFC are reported in enantiomeric excess (ee). For SFC chromatograms see Section J of Experimental Procedures.

## Experimental Procedures

### A. Syntheses of Amide Substrates

Supporting information for the syntheses of amides **1**,<sup>5</sup> **45–48**,<sup>5</sup> **21**,<sup>6</sup> **38**,<sup>6</sup> **49–52**,<sup>6</sup> and **53**<sup>7</sup> have been published and spectral data match those previously reported.

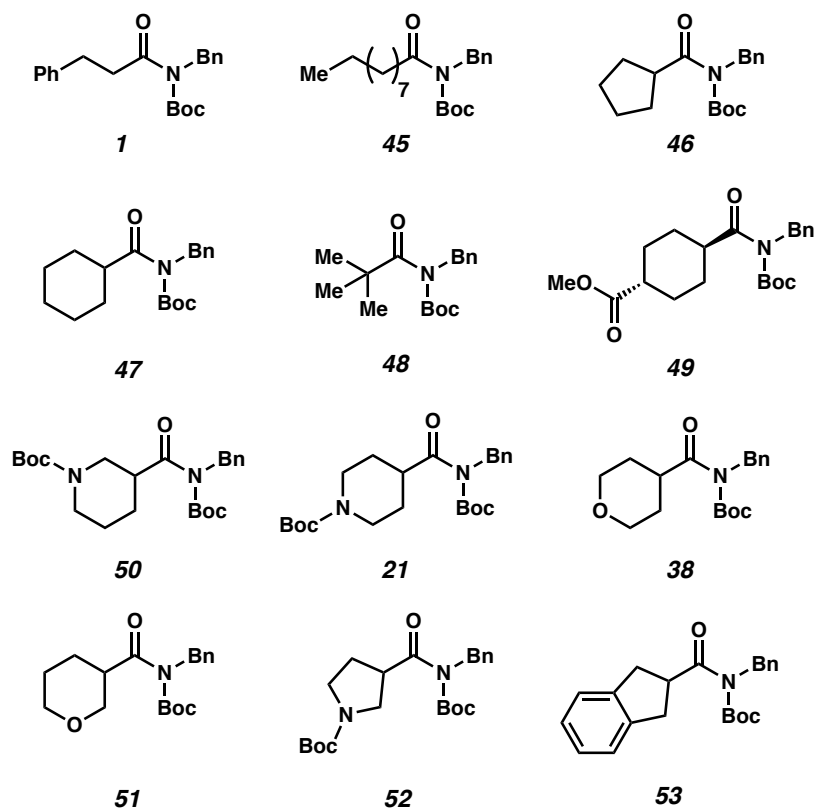

Syntheses for the remaining substrates shown in Figures 4 and 6 are as follows:

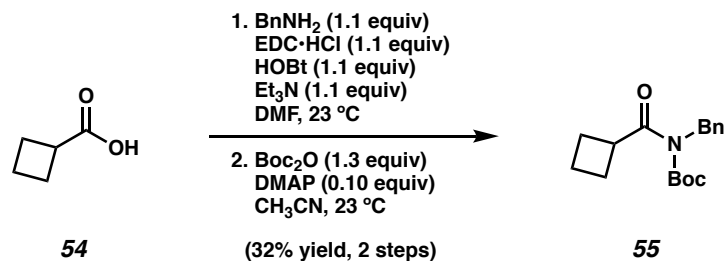

To a mixture of carboxylic acid **54** (65.0 mg, 0.650 mmol, 1.00 equiv), EDC·HCl (137 mg, 0.0720 mmol, 1.10 equiv), HOBT (109 g, 0.710 mmol, 1.10 equiv), triethylamine (0.100 mL, 0.710 mmol, 1.10 equiv), and DMF (5.00 mL, 0.130 M) was added benzylamine (78.0  $\mu\text{L}$ , 0.710

mmol, 1.10 equiv). The resulting mixture was stirred at 23 °C for 17 h, and then diluted with deionized water (5 mL) and transferred to a separatory funnel with brine (5 mL). The aqueous layer was extracted with EtOAc (3 x 10 mL), then the organic layers were combined and washed with deionized water (3 x 10 mL), dried over Na<sub>2</sub>SO<sub>4</sub>, and evaporated under reduced pressure. The resulting crude material was used in the subsequent step without further purification.

To a flask containing the crude material from the previous step was added DMAP (8.00 mg, 0.0650 mmol, 0.100 equiv) followed by acetonitrile (4.00 mL, 0.160 M). Boc<sub>2</sub>O (184 g, 0.850 mmol, 1.30 equiv) was added in one portion and the reaction vessel was flushed with N<sub>2</sub>, then the reaction mixture was allowed to stir at 23 °C for 20 h. The reaction was quenched by addition of saturated aqueous NaHCO<sub>3</sub> (5 mL), transferred to a separatory funnel with EtOAc (10 mL) and H<sub>2</sub>O (10 mL), and extracted with EtOAc (3 x 10 mL). The organic layers were combined, dried over Na<sub>2</sub>SO<sub>4</sub>, and evaporated under reduced pressure. The resulting crude residue was purified by flash column chromatography (29:1 Hexanes:EtOAc) to yield amide **55** (60.5 mg, 32% yield, over two steps) as a clear oil. Amide **55**: R<sub>f</sub> 0.65 (5:1 Hexanes:EtOAc); <sup>1</sup>H NMR (600 MHz, C<sub>6</sub>D<sub>6</sub>): δ 7.30 (d, *J* = 7.5, 2H), 7.11 (t, *J* = 7.5, 2H), 7.03 (t, *J* = 7.5, 1H), 4.88 (s, 2H), 4.05 (quint, *J* = 8.3, 1H), 2.54–2.43 (m, 2H), 2.30–2.18 (m, 2H), 1.82–1.67 (m, 2H), 1.17 (s, 9H); <sup>13</sup>C NMR (125 MHz, CDCl<sub>3</sub>): δ 178.0, 152.8, 138.6, 128.4, 127.6, 127.1, 83.0, 47.6, 41.4, 28.0, 25.8, 17.9; IR (film): 2980, 2869, 1732, 1687, 1144, 980 cm<sup>-1</sup>; HRMS-APCI (*m/z*) [M + H]<sup>+</sup> calcd for C<sub>17</sub>H<sub>24</sub>NO<sub>3</sub><sup>+</sup>, 290.17507; found 290.17377.

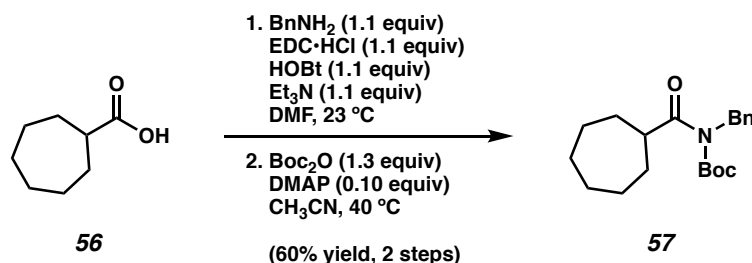

To a mixture of carboxylic acid **56** (1.00 g, 7.03 mmol, 1.00 equiv), EDC·HCl (1.48 g, 7.74 mmol, 1.10 equiv), HOBt (1.18 g, 7.74 mmol, 1.10 equiv), triethylamine (1.10 mL, 7.74 mmol, 1.10 equiv), and DMF (70 mL, 0.10 M) was added benzylamine (0.850 mL, 7.740 mmol, 1.10 equiv). The resulting mixture was stirred at 23 °C for 20 h, and then diluted with deionized

water (100 mL) and transferred to a separatory funnel with EtOAc (30 mL) and brine (15 mL). The aqueous layer was extracted with EtOAc (3 x 100 mL), then the organic layers were combined and washed with deionized water (4 x 100 mL), dried over Na<sub>2</sub>SO<sub>4</sub>, and evaporated under reduced pressure. The resulting crude solid material was used in the subsequent step without further purification.

To a flask containing the crude material from the previous step was added DMAP (85.9 mg, 0.703 mmol, 0.100 equiv) followed by acetonitrile (35.0 mL, 0.200 M). Boc<sub>2</sub>O (1.99 g, 9.14 mmol, 1.30 equiv) was added in one portion and the reaction vessel was flushed with N<sub>2</sub>, then the reaction mixture was allowed to stir at 40 °C for 16 h. The reaction was quenched by addition of saturated aqueous NaHCO<sub>3</sub> (100 mL), transferred to a separatory funnel with EtOAc (20 mL) and extracted with EtOAc (3 x 40 mL). The organic layers were combined, dried over Na<sub>2</sub>SO<sub>4</sub>, and evaporated under reduced pressure. The resulting crude residue was purified by flash chromatography (99:1 Hexanes:EtOAc → 9:1 Hexanes:EtOAc) to yield amide **57** as a white crystalline powder. Hot recrystallization of the purified product from *n*-heptane gave the recrystallized material (1.41 g, 60% yield over two steps) as white crystals. Amide **57**: mp: 57.7–62.8 °C; R<sub>f</sub> 0.57 (5:1 Hexanes:EtOAc); <sup>1</sup>H NMR (500 MHz, CDCl<sub>3</sub>): δ 7.32–7.27 (m, 2H), 7.25–7.20 (m, 3H), 4.85 (s, 2H), 3.59 (tt, *J* = 9.7, 3.9, 1H), 1.97–1.87 (m, 2H), 1.81–1.70 (m, 2H), 1.70–1.44 (m, 8H), 1.40 (s, 9H); <sup>13</sup>C NMR (125 MHz, CDCl<sub>3</sub>): δ 180.8, 153.3, 138.7, 128.4, 127.6, 127.1, 83.0, 47.8, 45.8, 31.9, 28.4, 28.0, 26.7; IR (film): 2977, 2928, 2858, 1734, 1694, 1369, 1148 cm<sup>-1</sup>; HRMS-APCI (*m/z*) [M + H]<sup>+</sup> calcd for C<sub>20</sub>H<sub>30</sub>NO<sub>3</sub><sup>+</sup>, 332.22202; found 332.22098.

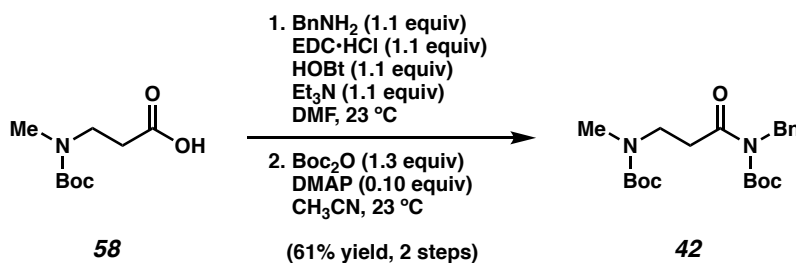

To a mixture of carboxylic acid **58** (500 mg, 2.46 mmol, 1.00 equiv), EDC·HCl (519 mg, 2.71 mmol, 1.10 equiv), HOBt (414 mg, 2.71 mmol, 1.10 equiv), triethylamine (0.380 mL, 2.71

mmol, 1.10 equiv), and DMF (25.0 mL, 0.100 M) was added benzylamine (0.300 mL, 2.71 mmol, 1.10 equiv). The resulting mixture was stirred at 23 °C for 23 h, and then diluted with deionized water (100 mL) and transferred to a separatory funnel with EtOAc (30 mL) and brine (15 mL). The aqueous layer was extracted with EtOAc (3 x 80 mL), then the organic layers were combined and washed with deionized water (4 x 80 mL), dried over Na<sub>2</sub>SO<sub>4</sub>, and evaporated under reduced pressure. The resulting crude solid material was used in the subsequent step without further purification.

To a flask containing the crude material from the previous step was added DMAP (28.9 mg, 0.236 mmol, 0.100 equiv) followed by acetonitrile (12.0 mL, 0.200 M). Boc<sub>2</sub>O (671 mg, 3.07 mmol, 1.30 equiv) was added in one portion and the reaction vessel was flushed with N<sub>2</sub>, then the reaction mixture was allowed to stir at 23 °C for 17 h. The reaction was quenched by addition of saturated aqueous NaHCO<sub>3</sub> (10 mL), transferred to a separatory funnel with EtOAc (20 mL) and extracted with EtOAc (3 x 40 mL). The organic layers were combined, dried over Na<sub>2</sub>SO<sub>4</sub>, and evaporated under reduced pressure. The resulting crude residue was purified by flash chromatography (19:1 Hexanes:EtOAc → 9:1 Hexanes:EtOAc) to yield amide **42** (0.57 g, 61% yield over two steps) as a clear oil. Amide **42**: R<sub>f</sub> 0.38 (5:1 Hexanes:EtOAc); <sup>1</sup>H NMR (500 MHz, CDCl<sub>3</sub>): δ 7.33–7.17 (m, 5H), 4.87 (br s, 2H), 3.55 (s, 2H), 3.15 (br s, 2H), 2.86 (br s, 3H), 1.45 (s, 9H), 1.40 (s, 9H); <sup>13</sup>C NMR (125 MHz, CDCl<sub>3</sub>): δ 174.4, 155.7, 153.1, 138.3, 128.4, 127.6, 127.3, 83.5, 79.6, 79.5, 47.4, 45.6, 45.3, 37.2, 36.6, 35.0, 34.8, 28.6, 28.0; IR (film): 2977, 1734, 1691, 1368, 1145 cm<sup>-1</sup>; HRMS-APCI (*m/z*) [M + H]<sup>+</sup> calcd for C<sub>21</sub>H<sub>33</sub>N<sub>2</sub>O<sub>5</sub><sup>+</sup>, 393.23840; found 393.23730.

*Note: 42 was obtained as a mixture of rotamers. These data represent empirically observed chemical shifts from the <sup>1</sup>H NMR and <sup>13</sup>C NMR spectra.*

## B. Relevant Control Experiments

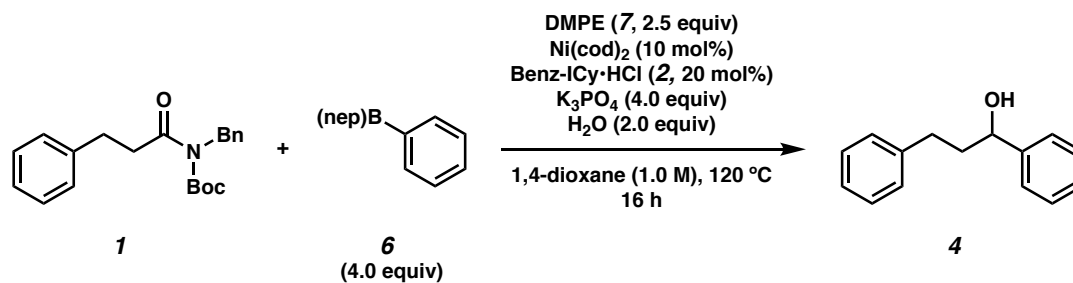

### Representative Procedure for Conversion of Aliphatic Amides to Secondary Alcohols from Figure 3 (amide **1** and boronate ester **6** used as an example).

A 1-dram vial was charged with anhydrous powder K<sub>3</sub>PO<sub>4</sub> (170 mg, 0.800 mmol, 4.00 equiv) and a magnetic stir bar. The vial and its contents were flame-dried under reduced pressure and allowed to cool under N<sub>2</sub>. Amide substrate **1** (67.9 mg, 0.200 mmol, 1.00 equiv), boronate ester nucleophile **6** (152 mg, 0.800 mmol, 4.00 equiv), and DMPE (**7**, 82.6 mg, 0.500 mmol, 2.50 equiv) were added. The vial was flushed with N<sub>2</sub> for 5 min, then water (7.21 μL, 0.400 mmol, 2.00 equiv), which had been sparged with N<sub>2</sub> for 10 min, was added. The vial was taken into a glovebox and charged with Ni(cod)<sub>2</sub> (5.50 mg, 0.0200 mmol, 10 mol%) and Benz-ICy·HCl (**2**, 12.8 mg, 0.0400 mmol, 20 mol%). Subsequently, 1,4-dioxane (200 μL, 1.00 M) was added. The vial was sealed with a Teflon-lined screw cap, removed from the glovebox, and stirred vigorously (800 RPM) at 120 °C for 16 h. After cooling to 23 °C, the mixture was quenched by the addition of saturated aqueous NH<sub>4</sub>Cl (1 mL) and extracted with EtOAc (3 x 2 mL). The combined organic layers were then filtered over a plug of silica gel (3 cm) and Na<sub>2</sub>SO<sub>4</sub> (3 cm) using EtOAc (10 mL) as eluent. The volatiles were removed under pressure and the yield of alcohol **4** was determined by <sup>1</sup>H NMR analysis with 1,3,5-trimethoxybenzene as an external standard.

*Any modifications of the conditions shown in the representative procedure above are specific below in Table S1.*



Table S1. Relevant Control Experiments

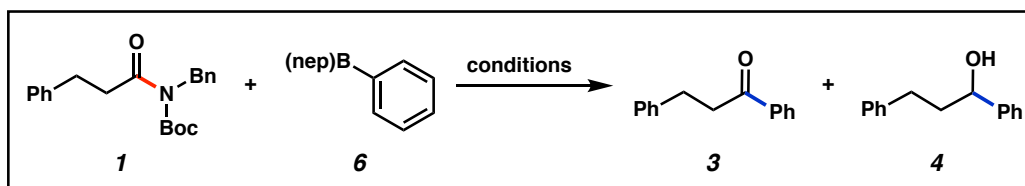

| Reaction Conditions                                                                                                                                                                                   | Experimental Results <sup>a</sup> |          |          |
|-------------------------------------------------------------------------------------------------------------------------------------------------------------------------------------------------------|-----------------------------------|----------|----------|
|                                                                                                                                                                                                       | <b>1</b>                          | <b>3</b> | <b>4</b> |
| <b>6</b> (4.0 equiv), DMPE ( <b>7</b> , 4.0 equiv), K <sub>3</sub> PO <sub>4</sub> (4.0 equiv), H <sub>2</sub> O (2.0 equiv)<br>1,4-dioxane (1.0 M), 120 °C, 16 h                                     | 5% <sup>b</sup>                   | 0%       | 0%       |
| <b>6</b> (4.0 equiv), DMPE ( <b>7</b> , 4.0 equiv), K <sub>3</sub> PO <sub>4</sub> (4.0 equiv), H <sub>2</sub> O (2.0 equiv)<br>Benz-ICy•HCl ( <b>2</b> , 20 mol%), 1,4-dioxane (1.0 M), 120 °C, 16 h | 0% <sup>b</sup>                   | 0%       | 0%       |
| <b>6</b> (4.0 equiv), DMPE ( <b>7</b> , 4.0 equiv), K <sub>3</sub> PO <sub>4</sub> (4.0 equiv), H <sub>2</sub> O (2.0 equiv)<br>Ni(cod) <sub>2</sub> (10 mol%), 1,4-dioxane (1.0 M), 120 °C, 16 h     | 12% <sup>b</sup>                  | 0%       | 0%       |

<sup>a</sup> Yields determined by <sup>1</sup>H NMR analysis using 1,3,5-trimethoxybenzene as an external standard.

<sup>b</sup> Substantial amounts of the corresponding Boc-cleavage product (des-Boc amide starting material) were observed due to the elevated reaction temperature.

### C. General Procedures for Methodology

**General Procedure A.** A 1-dram vial was charged with anhydrous powder K<sub>3</sub>PO<sub>4</sub> (170 mg, 8.00 mmol, 4.00 equiv) and a magnetic stir bar. The vial and its contents were flame-dried under reduced pressure and allowed to cool under N<sub>2</sub>. Amide substrate (0.200 mmol, 1.00 equiv), boronate ester nucleophile (152 mg, 0.800 mmol, 4.00 equiv), and DMPE (**7**, 82.6 mg, 0.500 mmol, 2.50 equiv) were added. The vial was flushed with N<sub>2</sub> for 5 min, then water (7.21 μL, 0.400 mmol, 2.00 equiv), which had been sparged with N<sub>2</sub> for 10 min, was added. The vial was taken into a glovebox and charged with Ni(cod)<sub>2</sub> (5.50 mg, 0.0200 mmol, 10 mol%) and Benz-ICy•HCl (**2**, 12.8 mg, 0.0400 mmol, 20 mol%). Subsequently, 1,4-dioxane (200 μL, 1.00 M) was added. The vial was sealed with a Teflon-lined screw cap, removed from the glovebox, and stirred vigorously (800 RPM) at 120 °C for 16 h. After cooling to 23 °C, the mixture was quenched by the addition of saturated aqueous NH<sub>4</sub>Cl (1 mL) and extracted with EtOAc (3 x 2 mL). The combined organic layers were then filtered over a plug of silica gel (3 cm) and Na<sub>2</sub>SO<sub>4</sub> (3 cm) using EtOAc (10 mL) as eluent and the volatiles were removed under pressure. The crude mixture was adsorbed onto silica gel (450 mg) under reduced pressure and purified by flash column chromatography on silica.

**General Procedure B.** A 1-dram vial was charged with anhydrous powder  $K_3PO_4$  (170 mg, 8.00 mmol, 4.00 equiv) and a magnetic stir bar. The vial and its contents were flame-dried under reduced pressure and allowed to cool under  $N_2$ . Amide substrate (0.200 mmol, 1.00 equiv), boronate ester nucleophile (152 mg, 0.800 mmol, 4.00 equiv), and DMPE (**7**, 82.6 mg, 0.500 mmol, 2.50 equiv) were added. The vial was flushed with  $N_2$  for 5 min, then water (7.21  $\mu$ L, 0.400 mmol, 2.00 equiv), which had been sparged with  $N_2$  for 10 min, was added. The vial was taken into a glovebox and charged with  $Ni(cod)_2$  (5.50 mg, 0.0200 mmol, 10 mol%) and Benz-ICy•HCl (**2**, 12.8 mg, 0.0400 mmol, 20 mol%). Subsequently, 1,4-dioxane (200  $\mu$ L, 1.00 M) was added. The vial was sealed with a Teflon-lined screw cap, removed from the glovebox, and stirred vigorously (800 RPM) at 120 °C for 16 h. After cooling to 23 °C, the mixture was diluted with  $CH_2Cl_2$  (1 mL) and washed with 2 M HCl (3 x 1 mL). The organic layer was then filtered over a plug of silica gel (3 cm) and  $Na_2SO_4$  (3 cm) using EtOAc (10 mL) as eluent and the volatiles were removed under pressure. The crude mixture was adsorbed onto silica gel (450 mg) under reduced pressure and purified by flash column chromatography on silica.

**General Procedure C.** A 1-dram vial was charged with anhydrous powder  $K_3PO_4$  (170 mg, 8.00 mmol, 4.00 equiv) and a magnetic stir bar. The vial and its contents were flame-dried under reduced pressure and allowed to cool under  $N_2$ . Amide substrate (0.200 mmol, 1.00 equiv), boronate ester nucleophile (228 mg, 1.20 mmol, 6.00 equiv), and DMPE (**7**, 82.6 mg, 0.500 mmol, 2.50 equiv) were added. The vial was flushed with  $N_2$  for 5 min, then water (7.21  $\mu$ L, 0.400 mmol, 2.00 equiv), which had been sparged with  $N_2$  for 10 min, was added. The vial was taken into a glovebox and charged with  $Ni(cod)_2$  (11.0 mg, 0.0400 mmol, 20 mol%) and Benz-ICy•HCl (**2**, 25.6 mg, 0.0800 mmol, 40 mol%). Subsequently, 1,4-dioxane (200  $\mu$ L, 1.00 M) was added. The vial was sealed with a Teflon-lined screw cap, removed from the glovebox, and stirred vigorously (800 RPM) at 120 °C for 16 h. After cooling to 23 °C, the mixture was diluted with  $CH_2Cl_2$  (1 mL) and washed with deionized  $H_2O$  (3 x 1 mL). The organic layer was then filtered over a plug of silica gel (3 cm) and  $Na_2SO_4$  (3 cm) using EtOAc (10 mL) as eluent and the volatiles were removed under pressure. The crude mixture was adsorbed onto silica gel (450 mg) under reduced pressure and purified by flash column chromatography on silica.

*Any modifications of the conditions shown in the representative procedures above are specified in the following schemes, which depict all of the results shown in Figures 4, 5, and 6.*

## D. Scope of Amide Substrates

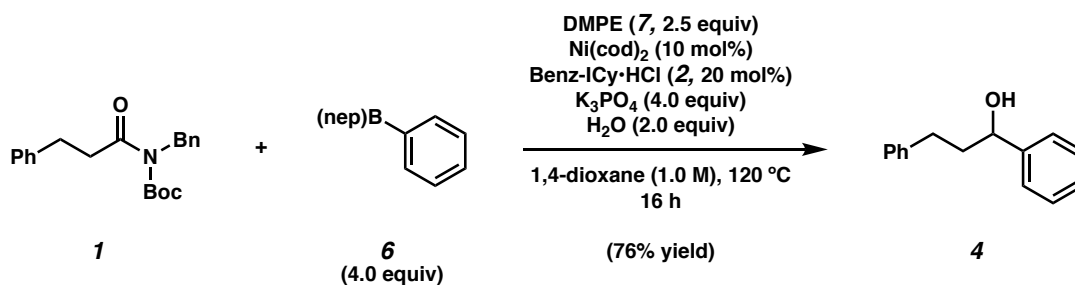

**Alcohol 4.** Crude alcohol **4** was synthesized following General Procedure A. Purification by flash column chromatography (99:1 Hexanes:EtOAc → 19:1 Hexanes:EtOAc) afforded alcohol **4** (76% yield, average of two experiments) as a white solid. Alcohol **4**: *R<sub>f</sub>* 0.34 (5:1 Hexanes:EtOAc). <sup>1</sup>H NMR (500 MHz, CDCl<sub>3</sub>): δ 7.40–7.34 (m, 4H), 7.32–7.27 (m, 3H), 7.23–7.16 (m, 3H), 4.70 (app t, *J* = 6.5, 1H), 2.76 (ddd, *J* = 13.9, 10.0, 5.8, 1H), 2.68 (ddd, *J* = 13.9, 9.6, 6.4, 1H), 2.21–1.98 (m, 2H), 1.92 (br s, 1H). Spectral data match those previously reported.<sup>8</sup>

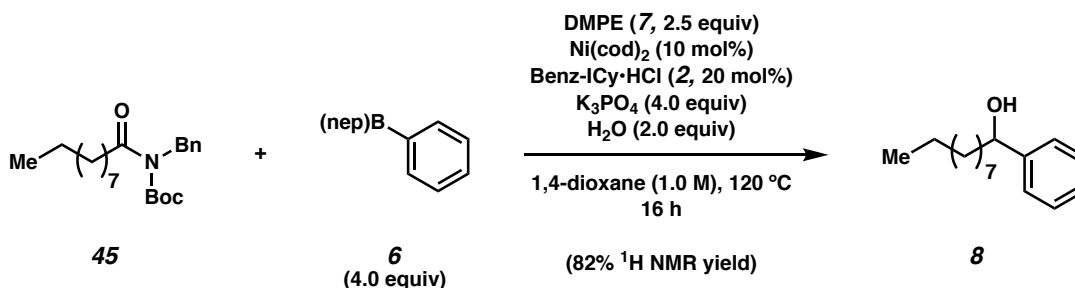

**Alcohol 8.** Crude alcohol **8** was synthesized following General Procedure A. <sup>1</sup>H NMR analysis of the crude reaction mixture indicated an 82% yield of alcohol **8** relative to 1,3,5-trimethoxybenzene external standard. Sequential purification by preparative thin-layer chromatography (3:1 Hexanes:Et<sub>2</sub>O, then 4:1 Hexanes:Acetone) provided an analytical sample of alcohol **8** as a clear oil. Alcohol **8**: *R<sub>f</sub>* 0.52 (5:1 Hexanes:EtOAc). <sup>1</sup>H NMR (500 MHz, CDCl<sub>3</sub>): δ 7.41–7.31 (m, 4H), 7.31–7.27 (m, 1H), 4.67 (dd, *J* = 7.5, 5.9, 1H), 1.87–1.75 (m, 2H), 1.75–1.65 (m, 1H), 1.49–1.36 (m, 1H), 1.36–1.16 (m, 13H), 0.87 (t, *J* = 6.8, 3H). Spectral data match those previously reported.<sup>9</sup>

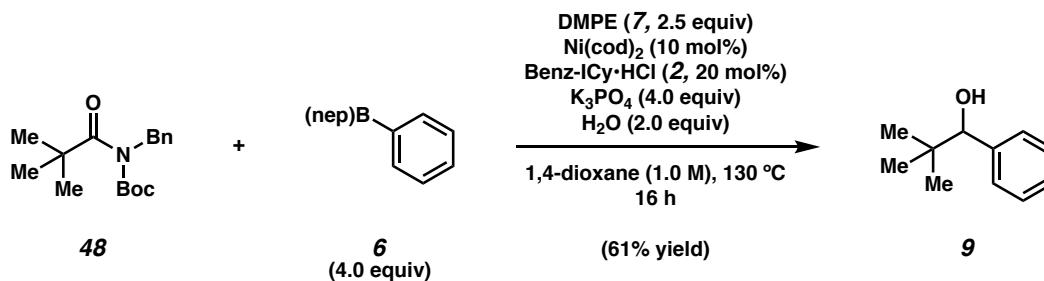

**Alcohol 9.** Crude alcohol **9** was synthesized following General Procedure A. Purification by flash column chromatography (39:1 Hexanes:Et<sub>2</sub>O → 6.5:1 Hexanes:Et<sub>2</sub>O) afforded alcohol **9** (61% yield, average of two experiments) as a clear oil. Alcohol **9**: *R<sub>f</sub>* 0.48 (5:1 Hexanes:EtOAc). <sup>1</sup>H NMR (500 MHz, CDCl<sub>3</sub>): δ 7.34–7.28 (m, 4H), 7.29–7.26 (m, 1H), 4.40 (s, 1H), 1.83 (s, 1H), 0.93 (s, 9H). Spectral data match those previously reported.<sup>10</sup>

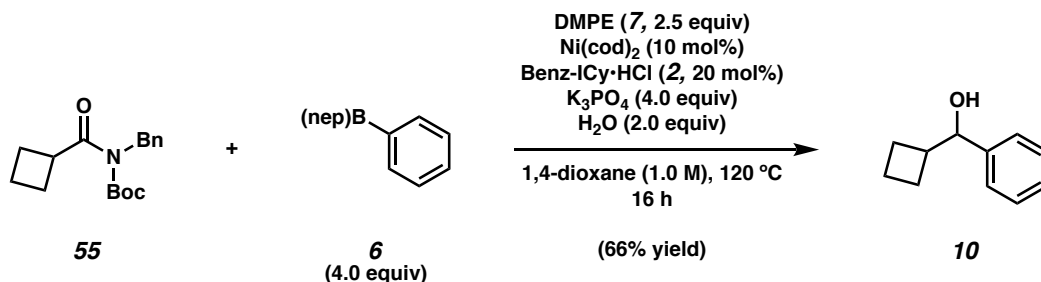

**Alcohol 10.** Crude alcohol **10** was synthesized following General Procedure A. Sequential purification by flash column chromatography (98:1:1 Hexanes:CH<sub>2</sub>Cl<sub>2</sub>:Et<sub>2</sub>O → 3:1:1 Hexanes:CH<sub>2</sub>Cl<sub>2</sub>:Et<sub>2</sub>O) followed by preparative thin-layer chromatography (1:1:1 CH<sub>2</sub>Cl<sub>2</sub>:Et<sub>2</sub>O:Hexanes) afforded alcohol **10** (66% yield, average of two experiments) as a clear oil. Alcohol **10**: *R<sub>f</sub>* 0.38 (5:1 Hexanes:EtOAc). <sup>1</sup>H NMR (500 MHz, CDCl<sub>3</sub>): δ 7.37–7.30 (m, 4H), 7.30–7.24 (m, 1H), 4.58 (d, *J* = 8.0, 1H), 2.69–2.56 (m, 1H), 2.15–1.96 (m, 2H), 1.92–1.75 (m, 5H). Spectral data match those previously reported.<sup>10</sup>

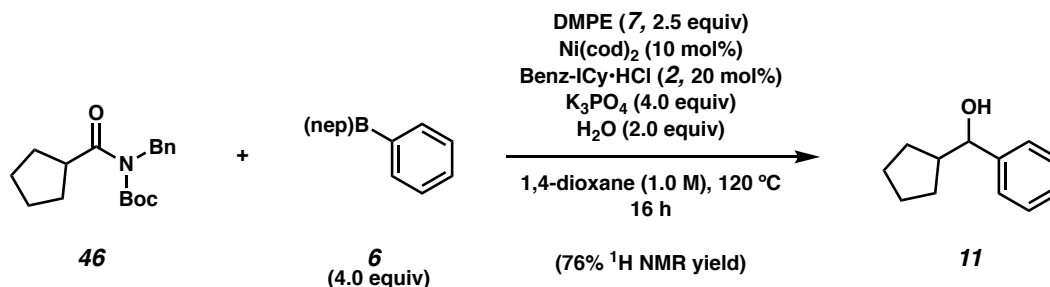

**Alcohol 11.** Crude alcohol **11** was synthesized following General Procedure A.  $^1\text{H}$  NMR analysis of the crude reaction mixture indicated a 76% yield of alcohol **11** relative to 1,3,5-trimethoxybenzene external standard. Sequential purification by preparative thin-layer chromatography (5:1 Hexanes:EtOAc, then 5:1:1 Hexanes: $\text{CH}_2\text{Cl}_2$ : $\text{Et}_2\text{O}$ ) afforded an analytical sample of alcohol **11** as a clear oil. Alcohol **11**:  $R_f$  0.46 (5:1 Hexanes:EtOAc).  $^1\text{H}$  NMR (500 MHz,  $\text{CDCl}_3$ ):  $\delta$  7.36–7.26 (m, 5H), 7.30–7.27 (m, 1H), 4.41 (d,  $J = 8.5$ , 1H), 2.22 (app sext,  $J = 8.2$ , 1H), 1.95–1.78 (m, 2H), 1.70–1.63 (m, 1H), 1.54–1.44 (m, 3H), 1.42–1.33 (m, 1H), 1.19–1.10 (m, 1H). Spectral data match those previously reported.<sup>11</sup>

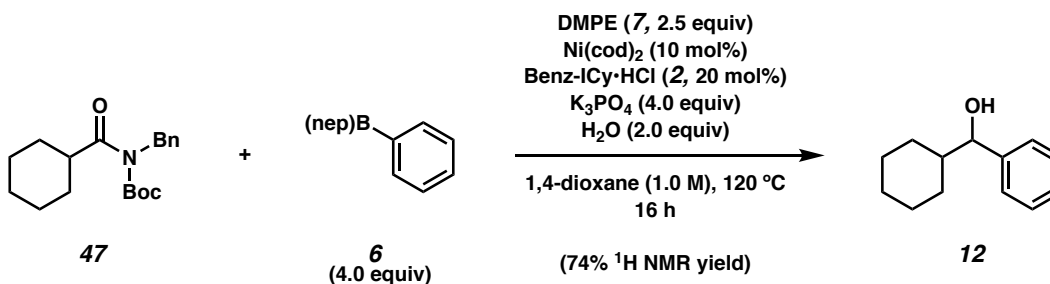

**Alcohol 12.** Crude alcohol **12** was synthesized following General Procedure A.  $^1\text{H}$  NMR analysis of the crude reaction mixture indicated a 74% yield of alcohol **12** relative to 1,3,5-trimethoxybenzene external standard. Alcohol **12**:  $R_f$  0.44 (5:1 Hexanes:EtOAc). Spectral data match those previously reported.<sup>12</sup>

*Note: The  $^1\text{H}$  NMR spectrum of the crude material obtained using the reaction conditions above is provided and matches previously reported  $^1\text{H}$  NMR data.*

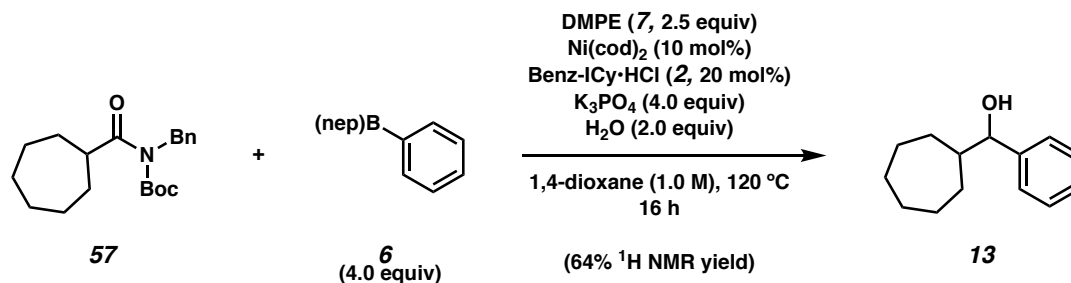

**Alcohol 13.** Crude alcohol **13** was synthesized following General Procedure A.  $^1\text{H}$  NMR analysis of the crude reaction mixture indicated an 64% yield of alcohol **13** relative to 1,3,5-trimethoxybenzene external standard). Preparation of an authentic sample of alcohol **13** from cycloheptyl(phenyl)methanone (see Section G for experimental details) allowed for direct comparison with the  $^1\text{H}$  NMR spectrum of the crude reaction mixture and full characterization. Alcohol **13**:  $R_f$  0.57 (5:1 Hexanes:EtOAc);  $^1\text{H}$  NMR (600 MHz,  $\text{CDCl}_3$ ):  $\delta$  7.35–7.23 (m, 5H), 4.47 (d,  $J = 6.7$ , 1H), 1.93–1.82 (m, 2H), 1.79 (br s, 1H), 1.72–1.65 (m, 1H), 1.65–1.30 (m, 9H), 1.23–1.09 (m, 1H);  $^{13}\text{C}$  NMR (125 MHz,  $\text{CDCl}_3$ ):  $\delta$  144.0, 128.3, 127.5, 126.8, 79.4, 46.4, 31.2, 29.4, 28.6, 28.5, 26.9, 26.7; IR (film): 3378, 2917, 2852, 1492, 699  $\text{cm}^{-1}$ ; HRMS-APCI ( $m/z$ ) [ $\text{M} + \text{H}$ ] $^+$  calcd for  $\text{C}_{14}\text{H}_{21}\text{O}^+$ , 205.15869; found 205.15788.

*Note:  $^1\text{H}$  NMR and  $^{13}\text{C}$  NMR spectra of the authentic material, as prepared in section G, are provided. A  $^1\text{H}$  NMR spectrum of the crude material obtained using the reaction conditions above is also provided and matches the  $^1\text{H}$  NMR spectrum of the authentic material.*

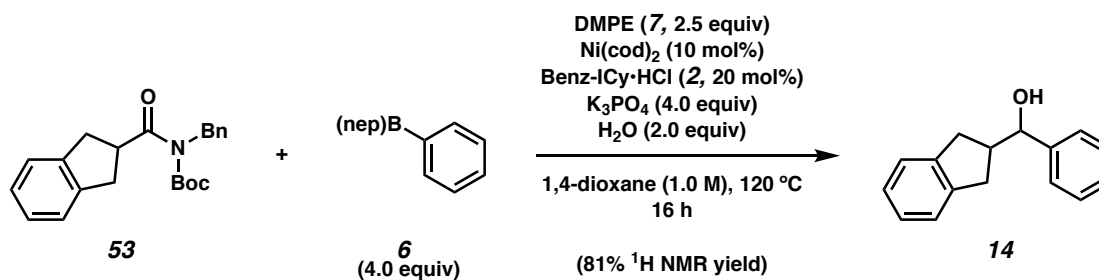

**Alcohol 14.** Crude alcohol **14** was synthesized following General Procedure A.  $^1\text{H}$  NMR analysis of the crude reaction mixture indicated an 81% yield of alcohol **14** relative to 1,3,5-trimethoxybenzene external standard (average of two experiments). To the crude reaction mixture was added a teflon-coated magnetic stir bar and  $\text{CH}_2\text{Cl}_2$  (1 mL). The solution was

stirred, cooled to 0 °C, TFA (200  $\mu$ L) was slowly added, and the contents were stirred at 0 °C for 1 h. The volatiles were then removed under reduced pressure to give the crude material, which was purified by flash column chromatography (99:1 Hexanes:EtOAc  $\rightarrow$  19:1 Hexanes:EtOAc). Treatment of the purified product with a solution (4 mL total volume, 1:1 v/v) of MeOH:2M KOH and stirring the resulting solution at 23 °C for 2 h afforded an analytical sample of alcohol **14** as a white solid. Alcohol **14**:  $R_f$  0.38 (5:1 Hexanes:EtOAc);  $^1\text{H}$  NMR (500 MHz,  $\text{CDCl}_3$ ):  $\delta$  7.43–7.29 (m, 5H), 7.23–7.22 (m, 1H), 7.14–7.11 (m, 3H), 4.63 (d,  $J = 8.5$ , 1H), 3.16 (dd,  $J = 16.0$ , 8.0, 1H), 3.06 (dd,  $J = 16.0$ , 8.0, 1H), 2.87 (app sext,  $J = 8.3$ , 1H), 2.69 (dd,  $J = 16.0$ , 8.0, 1H), 2.64 (dd,  $J = 16.0$ , 8.5, 1H);  $^{13}\text{C}$  NMR (125 MHz,  $\text{CDCl}_3$ ):  $\delta$  144.0, 143.2, 142.8, 128.7, 128.0, 126.7, 126.4, 126.3, 124.7, 124.5, 78.5, 47.3, 36.3, 36.1; IR (film): 3556, 3385, 3067, 3028, 2936  $\text{cm}^{-1}$ ; HRMS-APCI ( $m/z$ )  $[\text{M} + \text{NH}_4]^+$  calcd for  $\text{C}_{16}\text{H}_{20}\text{NO}^+$ , 242.15394; found 242.15312.

*Note: 14 was obtained as a mixture of rotamers. These data represent empirically observed chemical shifts from the  $^1\text{H}$  NMR and  $^{13}\text{C}$  NMR spectra.*

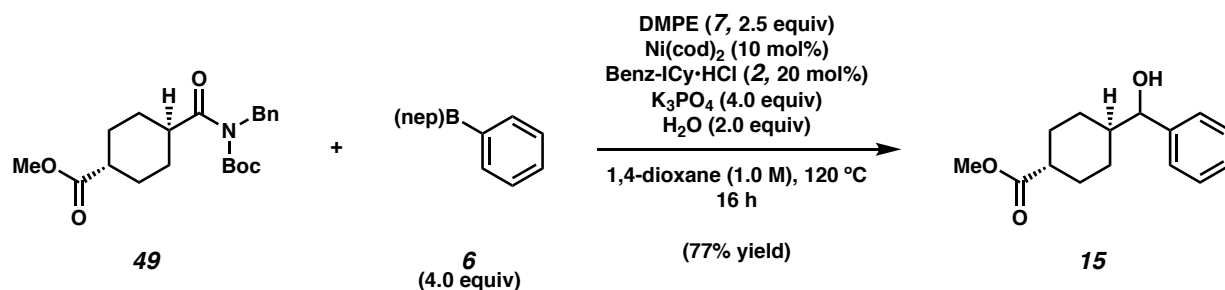

**Alcohol 15.** Crude alcohol **15** was synthesized following General Procedure A. Purification by flash column chromatography (99:1 Hexanes:Acetone  $\rightarrow$  9:1 Hexanes:Acetone) afforded a mixture of the trans and cis diastereomers of alcohol **15** (77% yield, 31:1 trans:cis diastereomers, average of two experiments) as a clear oil. Trans diastereomer alcohol **15**:  $R_f$  0.22 (5:1 Hexanes:EtOAc);  $^1\text{H}$  NMR (500 MHz,  $\text{CDCl}_3$ ):  $\delta$  7.37–7.24 (m, 5H), 4.35 (d,  $J = 7.2$ , 1H), 3.63 (s, 3H), 2.20 (tt,  $J = 12.4$ , 3.6, 1H), 2.13–1.87 (m, 4H), 1.66–1.56 (m, 1H), 1.51–1.28 (m, 3H), 1.13–0.96 (m, 2H);  $^{13}\text{C}$  NMR (125 MHz,  $\text{CDCl}_3$ ):  $\delta$  176.6, 143.5, 128.4, 127.7, 126.7, 79.1, 51.6,

44.2, 43.3, 28.70, 28.68, 28.4, 27.9; IR (film): 3454, 2938, 1731, 1716, 1170  $\text{cm}^{-1}$ ; HRMS-APCI ( $m/z$ )  $[\text{M} + \text{H}]^+$  calcd for  $\text{C}_{15}\text{H}_{21}\text{O}_3^+$ , 249.14852; found 249.14806.

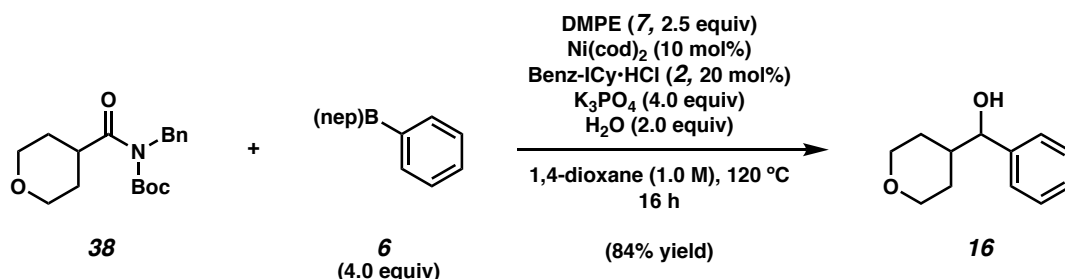

**Alcohol 16.** Crude alcohol **16** was synthesized following General Procedure B. Purification by flash column chromatography (19:1 Hexanes:EtOAc → 3:1 Hexanes:EtOAc) afforded alcohol **16** (84% yield, average of two experiments) as a white solid. Alcohol **16**:  $R_f$  0.23 (3:1 Hexanes:EtOAc). <sup>1</sup>H NMR (500 MHz, CDCl<sub>3</sub>):  $\delta$  7.38–7.26 (m, 5H), 4.32 (d,  $J = 7.7$ , 1H), 3.98 (app dd,  $J = 11.6$ , 4.6, 1H), 3.86 (app dd,  $J = 11.6$ , 4.6, 1H), 3.34 (td,  $J = 11.8$ , 2.2, 1H), 3.25 (td,  $J = 11.9$ , 2.3, 1H), 2.21 (br s, 1H), 1.94–1.86 (m, 1H), 1.86–1.72 (m, 1H), 1.50–1.36 (m, 1H), 1.36–1.20 (m, 1H), 1.20–1.07 (m, 1H). Spectral data match those previously reported.<sup>13</sup>

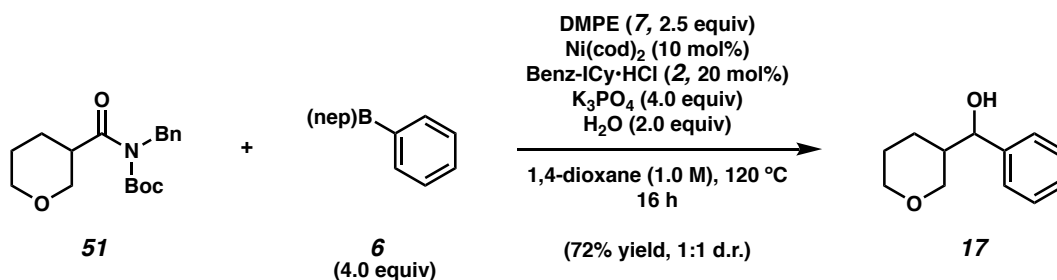

**Alcohol 17.** Crude alcohol **17** was synthesized following General Procedure B. Purification by flash chromatography (19:1 Hexanes:EtOAc → 1:1 Hexanes:EtOAc) afforded a mixture of diastereomers of alcohol **17** (72% yield, 1:1 d.r., average of two experiments) as a clear oil. Alcohol **17**:  $R_f$  0.27 (3:1 Hexanes:EtOAc); <sup>1</sup>H NMR (500 MHz, CDCl<sub>3</sub>):  $\delta$  7.37–7.26 (m, 10H), 4.50 (dd,  $J = 2.8$ , 7.0, 1H), 4.40 (dd,  $J = 2.9$ , 8.5, 1H), 4.16 (ddd,  $J = 1.8$ , 4.0, 11.3, 1H), 3.89–3.71 (m, 2H), 3.58 (ddd,  $J = 1.7$ , 4.0, 11.3, 1H), 3.49–3.30 (m, 3H), 3.20 (dd,  $J = 11.3$ , 9.4, 1H),



2.13, (d,  $J = 2.9$ , 1H), 2.10 (d,  $J = 3.0$ , 1H), 2.00–1.86 (m, 3H), 1.73–1.65 (m, 1H), 1.63–1.43 (m, 4H), 1.43–1.35 (m, 1H), 1.20–1.10 (m, 1H);  $^{13}\text{C}$  NMR (125 MHz,  $\text{CDCl}_3$ , 19 of 20 observed):  $\delta$  143.1, 143.0, 128.60, 128.56, 128.0, 127.9, 126.7, 126.4, 76.6, 75.9, 70.8, 70.6, 68.6, 68.4, 43.0, 42.9, 26.4, 25.4, 25.3; IR (film): 3401, 2938, 2846, 1453, 1081  $\text{cm}^{-1}$ ; HRMS-APCI ( $m/z$ ) [ $\text{M} + \text{H}$ ] $^+$  calcd for  $\text{C}_{12}\text{H}_{17}\text{O}_2^+$ , 193.12231; found 193.12228.

*Note: 17 was obtained as a mixture of diastereomers. These data represent empirically observed chemical shifts from the  $^1\text{H}$  NMR and  $^{13}\text{C}$  NMR spectra.*

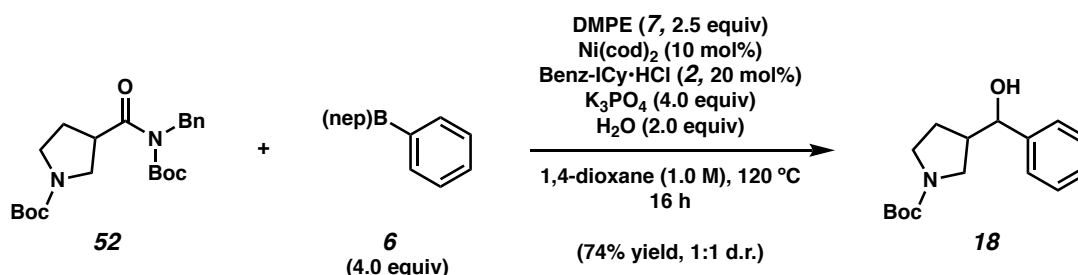

**Alcohol 18.** Crude alcohol **18** was synthesized following General Procedure B. Purification by flash chromatography (19:1 Hexanes:EtOAc → 1:1 Hexanes:EtOAc) afforded a mixture of diastereomers of alcohol **18** (74% yield, 1:1 d.r., average of two experiments) as a clear oil. Alcohol **18**:  $R_f$  0.27 (9:1 PhH:Acetone).  $^1\text{H}$  NMR (500 MHz,  $\text{DMSO}-d_6$ ): 7.44–7.08 (m, 5H), 5.45–5.33 (m, 1H), 4.52–4.21 (m, 1H), 3.45–2.83 (m, 4H), 2.47–2.27 (m, 1H), 1.97–1.71 (m, 1H), 1.63–1.30 (m, 10H). Spectral data match those previously reported.<sup>14</sup>

*Note: 18 was obtained as a mixture of rotamers and diastereomers. These data represent empirically observed chemical shifts from the  $^1\text{H}$  NMR and  $^{13}\text{C}$  NMR spectra.*

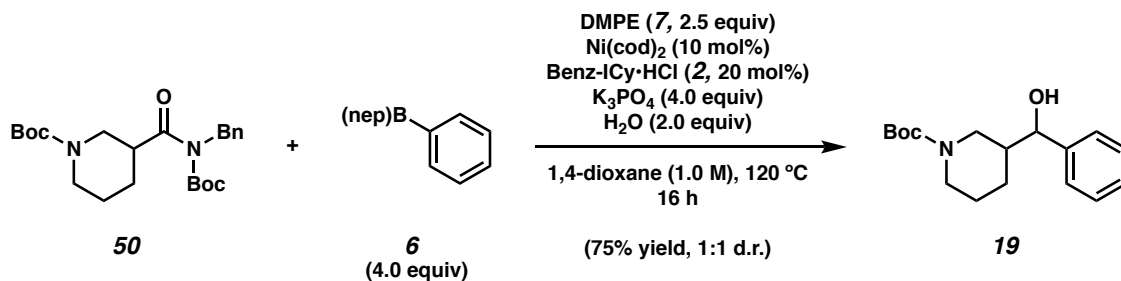

**Alcohol 19.** Crude alcohol **19** was synthesized following General Procedure B. Purification by flash column chromatography (PhH  $\rightarrow$  9:1 PhH:Acetone) afforded a mixture of diastereomers of alcohol **19** (75% yield, 1:1 d.r. average of two experiments) as a clear oil. Alcohol **19**:  $R_f$  0.44 (9:1 PhH:Acetone);  $^1\text{H}$  NMR (500 MHz,  $\text{CDCl}_3$ , 49 of 50 observed):  $\delta$  7.81–7.26 (m, 10H), 4.50 (br s, 1H), 4.43 (d,  $J = 8.5$ , 1H), 4.16–2.46 (m, 7H), 2.24–1.51 (m, 10H), 1.49–1.31 (m, 18H), 1.22–1.09 (m, 1H);  $^{13}\text{C}$  NMR (125 MHz,  $\text{CDCl}_3$ , 23 of 26 observed):  $\delta$  155.4, 155.0, 142.9, 128.57, 128.56, 127.93, 127.91, 126.7, 126.5, 79.7, 79.4, 76.5, 75.9, 46.7, 44.5, 43.1, 43.0, 28.6, 28.5, 27.0, 26.3, 24.8, 24.0; IR (film): 3422, 2975, 2930, 1665, 1424  $\text{cm}^{-1}$ ; HRMS-APCI ( $m/z$ )  $[\text{M} + \text{H}]^+$  calcd for  $\text{C}_{17}\text{H}_{26}\text{NO}_3^+$ , 292.19072; found 292.18998.

*Note: 19 was obtained as a mixture of rotamers and diastereomers. These data represent empirically observed chemical shifts from the  $^1\text{H}$  NMR and  $^{13}\text{C}$  NMR spectra.*

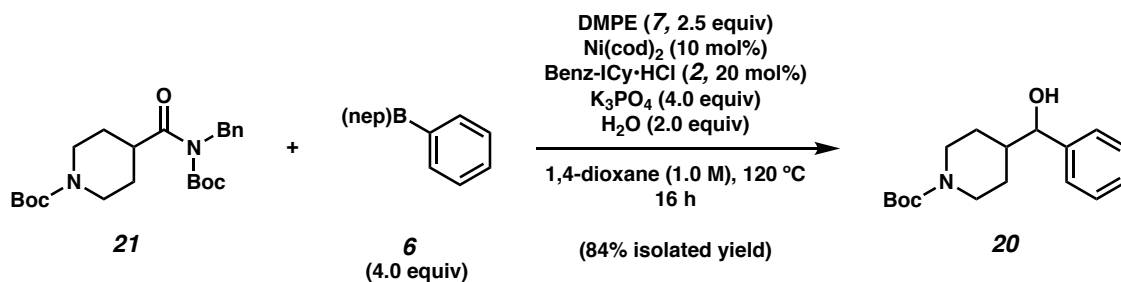

**Alcohol 20.** Crude alcohol **20** was synthesized following General Procedure B. Purification by flash column chromatography (PhH  $\rightarrow$  9:1 PhH:Acetone) afforded alcohol **20** (84% yield, average of two experiments) as a clear oil. Alcohol **20**:  $R_f$  0.33 (9:1 PhH:Acetone).  $^1\text{H}$  NMR (500 MHz,  $\text{CDCl}_3$ ): 7.38–7.23 (m, 5H), 4.34 (d,  $J = 7.5$ , 1H), 4.29–3.81 (m, 2H), 2.77–2.38 (m, 2H), 2.26 (br s, 1H), 1.98–1.89 (m, 1H), 1.81–1.65 (m, 1H), 1.42 (s, 9H), 1.33–1.17 (m, 2H), 1.11 (app qd,  $J = 12.5, 4.4$ , 1H). Spectral data match those previously reported.<sup>13</sup>

## E. Scope of Boronate Ester Nucleophiles

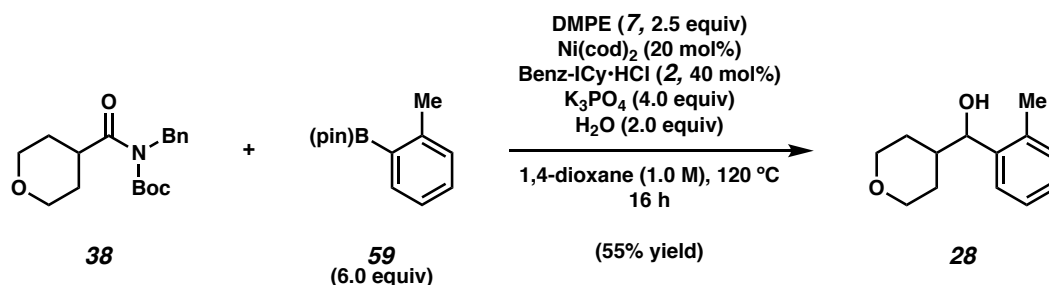

**Alcohol 28.** Crude alcohol **28** was synthesized following General Procedure B. Purification by flash column chromatography (19:1 Hexanes:EtOAc  $\rightarrow$  3:1 Hexanes:EtOAc) afforded alcohol **28** (55% yield, average of two experiments) as a crystalline solid. Alcohol **28**: mp: 62–64 °C;  $R_f$  0.32 (2:1 Hexanes:EtOAc);  $^1\text{H NMR}$  (500 MHz,  $\text{CDCl}_3$ ):  $\delta$  7.42 (dd,  $J = 7.7, 1.3$ , 1H), 7.23 (td,  $J = 7.5, 1.5$ , 1H), 7.21–7.12 (m, 2H), 4.69 (d,  $J = 7.3$ , 1H), 4.03 (dd,  $J = 11.2, 4.5$ , 1H), 3.90 (dd,  $J = 11.5, 4.5$ , 1H), 3.37 (td,  $J = 9.5, 2.3$ , 1H), 3.29 (td,  $J = 9.5, 2.3$ , 1H), 2.35 (s, 3H), 1.96–1.83 (m, 2H), 1.71 (br s, 1H), 1.60–1.48 (m, 1H), 1.42 (qd,  $J = 12.5, 4.6$ , 1H), 1.22–1.15 (m, 1H);  $^{13}\text{C NMR}$  (125 MHz,  $\text{CDCl}_3$ ):  $\delta$  141.3, 135.3, 130.6, 127.5, 126.39, 126.36, 74.6, 68.1, 67.9, 42.2, 29.4, 29.2, 19.6; IR (film): 3420, 2951, 2847, 1090, 1016  $\text{cm}^{-1}$ ; HRMS-APCI ( $m/z$ ) [ $\text{M} + \text{H}$ ] $^+$  calcd for  $\text{C}_{13}\text{H}_{19}\text{O}_2^+$ , 207.13796; found 207.13823.

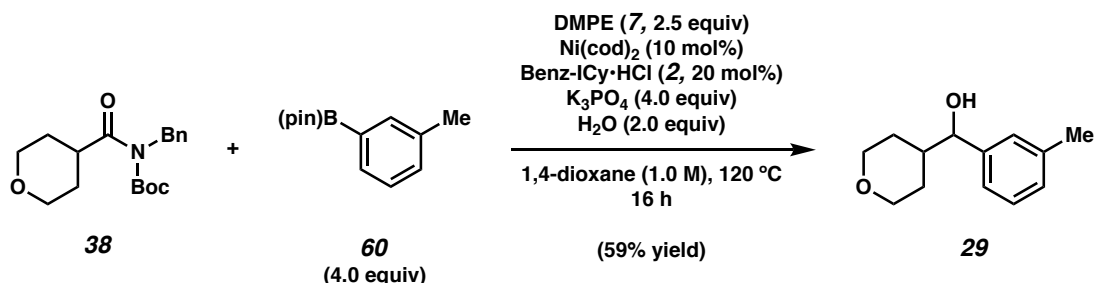

**Alcohol 29.** Crude alcohol **29** was synthesized following General Procedure B. Purification by flash chromatography (19:1 Hexanes:EtOAc  $\rightarrow$  3:1 Hexanes:EtOAc) afforded alcohol **29** (59% yield, average of two experiments) as a white solid. Alcohol **29**: mp: 97–99 °C;  $R_f$  0.36 (2:1 Hexanes:EtOAc);  $^1\text{H NMR}$  (500 MHz,  $\text{CDCl}_3$ ):  $\delta$  7.23 (t,  $J = 7.5$ , 1H), 7.12–7.09 (m, 3H), 4.33 (d,  $J = 7.9$ , 1H), 4.02 (dd,  $J = 11.4, 4.4$ , 1H), 3.90 (dd,  $J = 11.4, 4.4$ , 1H), 3.37 (td,  $J = 11.9, 2.3$ ,

1H), 3.29 (td,  $J = 11.9, 2.3$ , 1H), 2.36 (s, 3H), 1.93–1.90 (m, 1H), 1.89–1.79 (m, 2H), 1.47 (qd,  $J = 12.2, 4.5$ , 1H), 1.32 (qd,  $J = 12.2, 4.6$ , 1H), 1.18–1.15 (m, 1H);  $^{13}\text{C}$  NMR (125 MHz,  $\text{CDCl}_3$ ):  $\delta$  143.0, 138.2, 128.7, 128.4, 127.4, 123.8, 79.1, 68.0, 67.8, 42.5, 29.5, 29.4, 21.6; IR (film): 3409, 2950, 2848, 1135, 1089, 1035  $\text{cm}^{-1}$ ; HRMS-APCI ( $m/z$ )  $[\text{M} + \text{H}]^+$  calcd for  $\text{C}_{13}\text{H}_{19}\text{O}_2^+$ , 207.13796; found 207.13826.

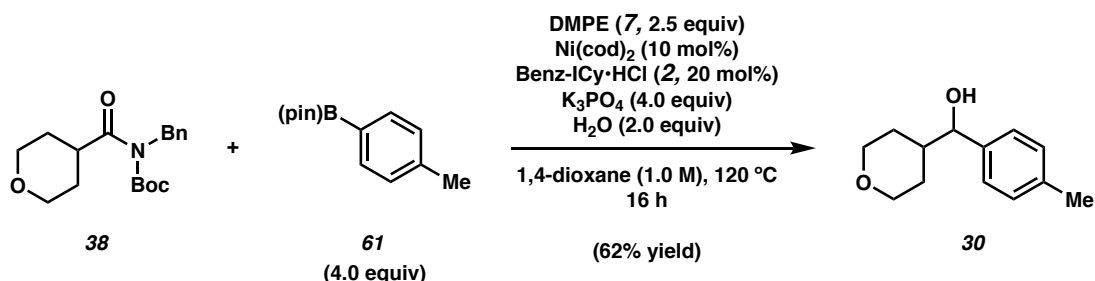

**Alcohol 30.** Crude alcohol **30** was synthesized following General Procedure B. Purification by flash chromatography (19:1 Hexanes:EtOAc  $\rightarrow$  3:1 Hexanes:EtOAc) afforded alcohol **30** (62% yield, average of two experiments) as a white solid. Alcohol **30**: mp: 71–74 °C;  $R_f$  0.25 (2:1 Hexanes:EtOAc);  $^1\text{H}$  NMR (500 MHz,  $\text{CDCl}_3$ ):  $\delta$  7.24–7.13 (m, 4H), 4.33 (d,  $J = 7.9$ , 1H), 4.02 (dd,  $J = 11.8, 4.4$ , 1H), 3.89 (dd,  $J = 11.2, 4.8$ , 1H), 3.37 (td,  $J = 11.9, 2.3$ , 1H), 3.28 (td,  $J = 11.9, 2.3$ , 1H), 2.34 (s, 3H), 1.94–1.91 (m, 1H), 1.86–1.79 (m, 1H), 1.46 (qd,  $J = 12.3, 4.7$ , 1H), 1.30 (qd,  $J = 12.3, 4.7$ , 1H), 1.17–1.13 (m, 1H);  $^{13}\text{C}$  NMR (125 MHz,  $\text{CDCl}_3$ ):  $\delta$  143.0, 137.6, 129.2, 126.7, 78.8, 68.0, 67.8, 42.5, 29.6, 29.3, 21.3; IR (film): 3410, 2950, 2847, 1089, 1033, 1017  $\text{cm}^{-1}$ ; HRMS-APCI ( $m/z$ )  $[\text{M} + \text{H}]^+$  calcd for  $\text{C}_{13}\text{H}_{19}\text{O}_2^+$ , 207.13796; found 207.13823.

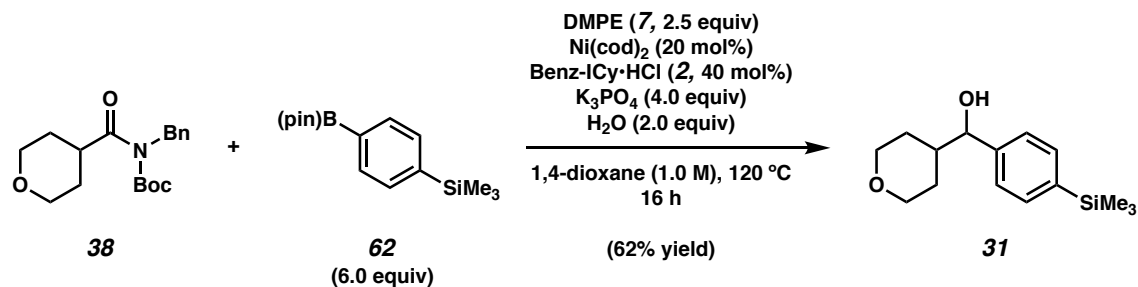

**Alcohol 31.** Crude alcohol **31** was synthesized following General Procedure B. Purification by flash chromatography (PhH → 9:1 PhH:Acetone) afforded alcohol **31** (62% yield, average of two experiments) as a clear oil. Alcohol **31**:  $R_f$  0.26 (9:1 PhH:Acetone); <sup>1</sup>H NMR (500 MHz, CDCl<sub>3</sub>): δ 7.51 (d,  $J$  = 8.1, 2H), 7.30 (d,  $J$  = 8.1, 2H), 4.37 (d,  $J$  = 7.5, 1H), 4.02 (dd,  $J$  = 11.4, 4.6, 1H), 3.90 (dd,  $J$  = 11.4, 4.6, 1H), 3.37 (td,  $J$  = 12.0, 2.3, 1H), 2.29 (td,  $J$  = 12.0, 2.3, 1H), 1.95–1.89 (m, 1H), 1.89–1.74 (m, 2H), 1.47 (app qd,  $J$  = 12.6, 4.7, 1H), 1.39–1.29 (m, 1H), 1.22–1.16 (m, 1H), 0.26 (s, 9H); <sup>13</sup>C NMR (125 MHz, CDCl<sub>3</sub>): δ 143.5, 140.2, 133.6, 126.1, 79.0, 68.0, 67.8, 42.4, 29.4, 29.3, –0.98; IR (film): 3409, 2953, 2846, 1247, 831 cm<sup>-1</sup>; HRMS-APCI ( $m/z$ ) [ $M + K$ ]<sup>+</sup> calcd for C<sub>15</sub>H<sub>24</sub>O<sub>2</sub>SiK<sup>+</sup>, 303.11771; found 303.11798.

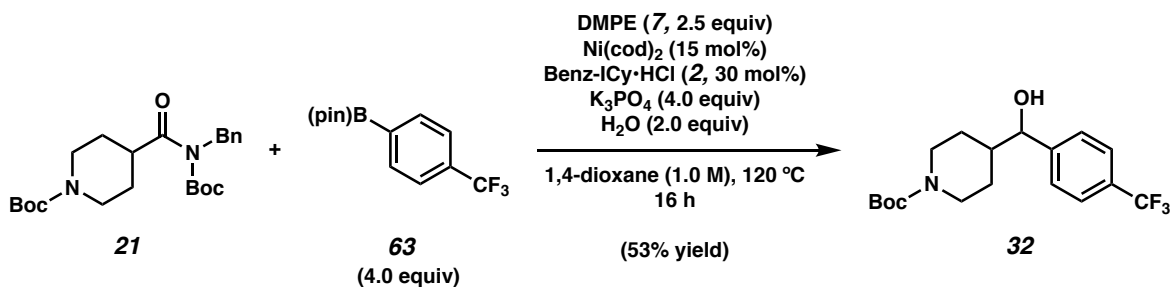

**Alcohol 32.** Crude alcohol **32** was synthesized following General Procedure B. Purification by flash chromatography (PhH → 9:1 PhH:Acetone) afforded alcohol **32** (53% yield, average of two experiments) as a clear oil. Alcohol **32**: mp: 140–143 °C;  $R_f$  0.29 (9:1 PhH:Acetone). <sup>1</sup>H NMR (500 MHz, CDCl<sub>3</sub>): δ 7.61 (d,  $J$  = 8.3, 2H), 7.43 (d,  $J$  = 8.3, 2H), 4.48 (d,  $J$  = 7.1, 1H), 4.29–3.93 (m, 2H), 2.77–2.45 (m, 2H), 2.01 (br s, 1H), 1.93–1.84 (m, 1H), 1.80–1.69 (m, 1H), 1.44 (s, 9H), 1.34–1.12 (m, 4H); <sup>13</sup>C NMR (125 MHz, CDCl<sub>3</sub>): δ 154.9, 147.1, 130 (q,  $J$  = 32), 127.0, 125.4 (q,  $J$  = 3.6), 125.4, 125.3, 123.1, 79.6, 77.9, 43.7, 28.6, 28.4, 27.9; IR (film): 3418,

2932, 2859, 1666, 1325, 1162, 1125  $\text{cm}^{-1}$ ; HRMS-APCI ( $m/z$ )  $[\text{M}]^+$  calcd for  $\text{C}_{18}\text{H}_{24}\text{F}_3\text{NO}_3^+$ , 359.17028; found 359.17126.

*Note: 32 was obtained as a mixture of rotamers. These data represent empirically observed chemical shifts from the  $^1\text{H}$  NMR and  $^{13}\text{C}$  NMR spectra.*

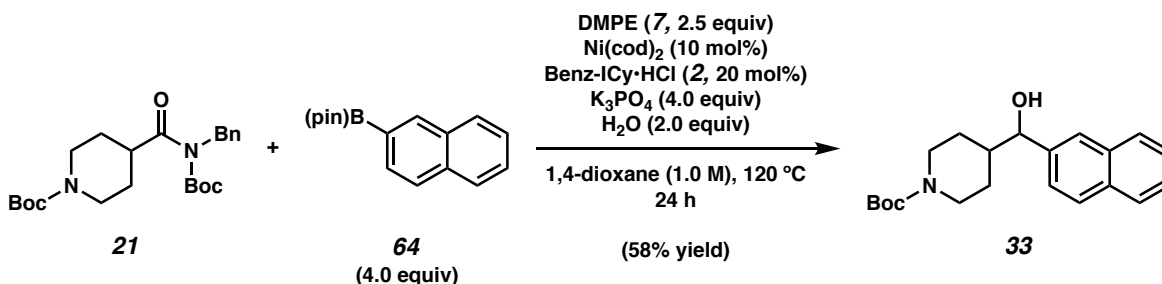

**Alcohol 33.** Crude alcohol **33** was synthesized following General Procedure B. Purification by flash chromatography (PhH → 9:1 PhH:Acetone) afforded alcohol **33** (58% yield, average of two experiments) as a clear oil. Alcohol **33**:  $R_f$  0.39 (9:1 PhH:Acetone);  $^1\text{H}$  NMR (500 MHz,  $\text{CDCl}_3$ ):  $\delta$  7.89–7.80 (m, 3H), 7.73, (s, 1H), 7.53–7.43 (m, 3H), 4.56 (d,  $J = 7.5$ , 1H), 4.17 (app d,  $J = 13.4$ , 1H), 4.04 (app d,  $J = 13.4$ , 1H), 2.68 (td,  $J = 12.9$ , 2.7, 1H), 2.58 (td,  $J = 12.9$ , 2.7, 1H), 2.04–1.98 (m, 1H), 1.89–1.82 (m, 1H), 1.43 (s, 9H), 1.36–1.15 (m, 4H);  $^{13}\text{C}$  NMR (125 MHz,  $\text{CDCl}_3$ , 16 of 17 observed):  $\delta$  154.9, 140.5, 133.3, 133.2, 128.4, 128.0, 127.8, 126.4, 126.1, 125.7, 124.5, 79.4, 78.8, 43.5, 28.6, 28.4; IR (film): 3418, 2974, 2929, 2856, 1666, 1425, 1162  $\text{cm}^{-1}$ ; HRMS-APCI ( $m/z$ )  $[\text{M} + \text{H}]^+$  calcd for  $\text{C}_{21}\text{H}_{28}\text{NO}_3^+$ , 342.20637; found 342.20615.

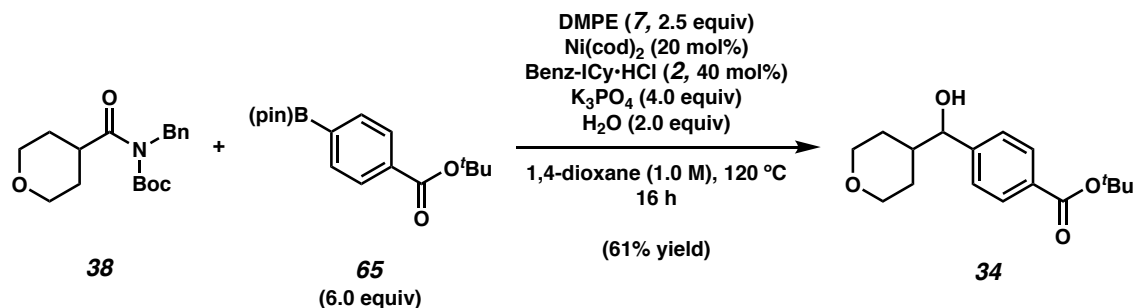

**Alcohol 34.** Crude alcohol **34** was synthesized following General Procedure B. Purification by flash chromatography (19:1 Hexanes:EtOAc → 3:1 Hexanes:EtOAc) generated alcohol **34** (61% yield, average of two experiments) as a clear oil. Alcohol **34**:  $R_f$  0.18 (2:1 Hexanes:EtOAc);  $^1\text{H}$  NMR (500 MHz,  $\text{CDCl}_3$ ):  $\delta$  8.00–7.95 (m, 2H), 7.39–7.34 (m, 2H), 4.45 (d,  $J = 7.2$ , 1H), 4.01 (app dd,  $J = 11.4$ , 4.2, 1H), 3.90 (app dd,  $J = 11.4$ , 4.2, 1H), 3.35 (td,  $J = 12.0$ , 2.0, 1H), 3.27 (td,  $J = 12.0$ , 2.0, 1H), 1.91 (br s, 1H), 1.88–1.78 (m, 2H), 1.59 (s, 9H), 1.52–1.42 (m, 1H), 1.40–1.31 (m, 1H), 1.18–1.14 (m, 1H);  $^{13}\text{C}$  NMR (125 MHz,  $\text{CDCl}_3$ ):  $\delta$  165.7, 147.5, 131.6, 129.7, 128.5, 126.5, 81.2, 78.4, 68.0, 67.7, 42.6, 29.3, 29.1, 28.3; IR (film): 3417, 2953, 2848, 1710, 1292, 1117  $\text{cm}^{-1}$ ; HRMS-APCI ( $m/z$ )  $[\text{M} + \text{H}]^+$  calcd for  $\text{C}_{17}\text{H}_{25}\text{O}_4^+$ , 293.17474; found 293.17416.

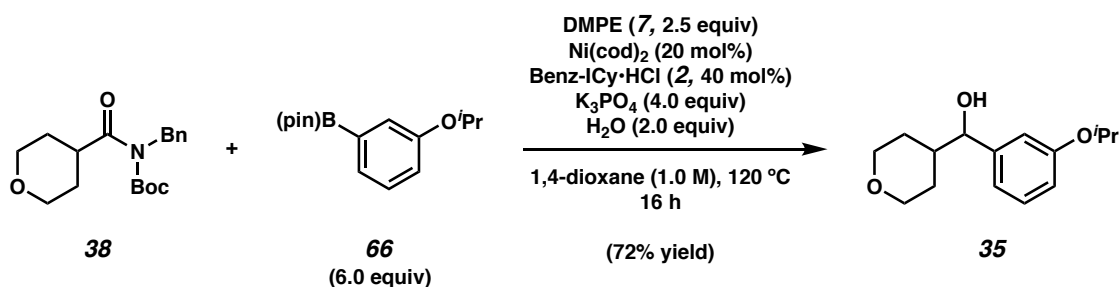

**Alcohol 35.** Crude alcohol **35** was synthesized following General Procedure B. Purification by flash chromatography (PhH → 9:1 PhH:Acetone) generated alcohol **35** (72% yield, average of two experiments) as a clear oil. Alcohol **35**:  $R_f$  0.31 (9:1 PhH:Acetone);  $^1\text{H}$  NMR (500 MHz,  $\text{CDCl}_3$ ):  $\delta$  7.24 (t,  $J = 8.1$ , 1H), 6.87–6.84 (m, 2H), 6.81 (ddd,  $J = 8.1$ , 2.5, 0.85, 1H), 4.56 (sept,  $J = 6.0$ , 1H), 4.32 (d,  $J = 7.6$ , 1H), 4.02 (app dd,  $J = 11.4$ , 4.2, 1H), 3.90 (app dd,  $J = 11.4$ , 4.2, 1H), 3.36 (td,  $J = 12.0$ , 2.2, 1H), 3.28 (td,  $J = 11.8$ , 2.2, 1H), 1.94–1.87 (m, 1H), 1.87–1.78 (m,

1H), 1.58 (br s, 1H) 1.46 (qd,  $J = 12.3, 4.6$ , 1H), 1.34 (d,  $J = 6.1$ ), 1.33 (qd,  $J = 12.3, 4.4$ ) (7H total), 1.23–1.15 (m, 1H);  $^{13}\text{C}$  NMR (125 MHz,  $\text{CDCl}_3$ ):  $\delta$  158.1, 144.7, 129.5, 118.9, 115.0, 114.3, 78.9, 69.9, 68.0, 67.8, 42.5, 29.4, 29.3, 22.2; IR (film): 3406, 2974, 2847, 1599, 1583, 1253, 1116  $\text{cm}^{-1}$ ; HRMS-APCI ( $m/z$ ) [ $\text{M}]^+$  calcd for  $\text{C}_{15}\text{H}_{22}\text{O}_3^+$ , 250.15635; found 250.15623.

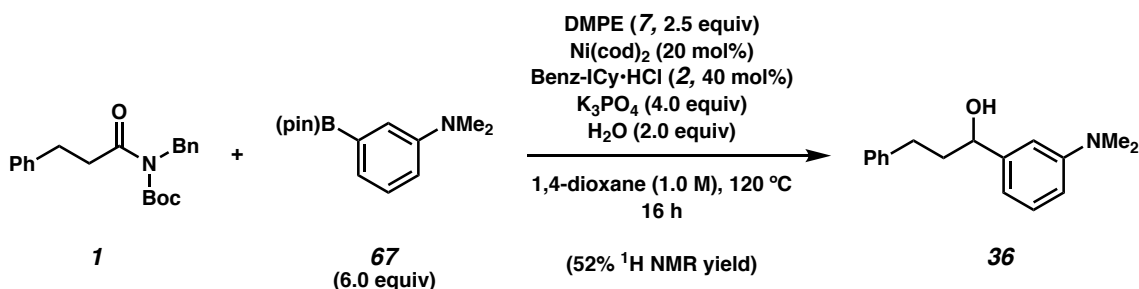

**Alcohol 36.** Crude alcohol **36** was synthesized following General Procedure C.  $^1\text{H}$  NMR analysis of the crude reaction mixture indicated an 52% yield of alcohol **36** relative to 1,3,5-trimethoxybenzene external standard (average of two experiments). Purification by preparative thin-layer chromatography (9:1 PhH:Acetone) provided an analytical sample of alcohol **36** as a clear oil. Alcohol **36**:  $R_f$  0.54 (2:1 Hex:EtOAc);  $^1\text{H}$  NMR (500 MHz,  $\text{CDCl}_3$ ):  $\delta$  7.30–7.26 (m, 2H), 7.25–7.14 (m, 3H), 6.75–6.72 (m, 1H), 6.70 (app d,  $J = 7.5$ , 1H), 6.66 (ddd,  $J = 8.5, 2.6, 0.8$ , 1H), 4.62 (ddd,  $J = 8.3, 5.4, 3.3$ , 1H), 2.96 (s, 6H), 2.77 (ddd,  $J = 14.5, 9.8, 5.8$ , 1H), 2.69 (ddd,  $J = 14.5, 9.8, 6.4$ , 1H), 2.20–2.10 (m, 1H), 2.10–1.99 (m, 1H), 1.81 (d,  $J = 3.3$ , 1H);  $^{13}\text{C}$  NMR (125 MHz,  $\text{CDCl}_3$ ):  $\delta$  151.0, 145.7, 142.1, 129.4, 128.6, 128.5, 125.9, 114.3, 112.1, 110.1, 74.6, 40.8, 40.4, 32.3; IR (film): 3366, 3025, 2918, 2858, 2801, 1602, 1495, 697  $\text{cm}^{-1}$ ; HRMS-APCI ( $m/z$ ) [ $\text{M} + \text{H}]^+$  calcd for  $\text{C}_{17}\text{H}_{22}\text{NO}^+$ , 256.16959; found 256.16915.



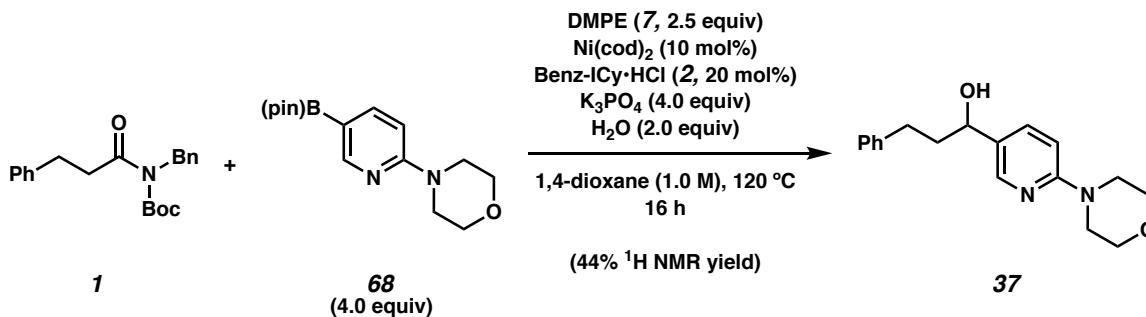

**Alcohol 37.** Crude alcohol **37** was synthesized following General Procedure C. <sup>1</sup>H NMR analysis of the crude reaction mixture indicated a 44% yield of alcohol **37** and 56% yield of the corresponding ketone intermediate relative to 1,3,5-trimethoxybenzene external standard (average of two experiments). Preparation of an authentic sample of alcohol **37** (see Section G for experimental details) allowed for direct comparison with the <sup>1</sup>H NMR spectrum of the crude reaction mixture and full characterization. Alcohol **37**: R<sub>f</sub> 0.45 (3:1 PhH:Acetone); <sup>1</sup>H NMR (500 MHz, CDCl<sub>3</sub>): δ 8.15 (d, *J* = 2.4, 1H), 7.55 (dd, *J* = 8.8, 2.4, 1H), 7.31–7.26 (m, 2H), 7.22–7.15 (m, 3H), 6.65 (d, *J* = 8.8, 1H), 4.65–4.59 (m, 1H), 3.83 (app t, *J* = 4.8, 4H), 3.50 (app t, *J* = 4.8, 4H), 2.76–2.58 (m, 2H), 2.20–2.10 (m, 1H), 2.06–1.95 (m, 1H), 1.78–1.68 (m, 1H); <sup>13</sup>C NMR (125 MHz, CDCl<sub>3</sub>): δ 159.6, 146.3, 141.7, 135.8, 129.5, 128.56, 128.55, 126.1, 107.1, 71.6, 66.9, 45.8, 40.0, 32.2; IR (film): 3391, 3025, 2918, 2855, 1605, 1494, 1245 cm<sup>-1</sup>; HRMS-APCI (*m/z*) [M + H]<sup>+</sup> calcd for C<sub>18</sub>H<sub>23</sub>N<sub>2</sub>O<sub>2</sub><sup>+</sup>, 299.17540; found 299.17471.

*Note: <sup>1</sup>H NMR and <sup>13</sup>C NMR spectra of the authentic material, as prepared in section G, are provided. A <sup>1</sup>H NMR spectrum of the crude material obtained using the reaction conditions above is also provided and matches the <sup>1</sup>H NMR spectrum of the authentic material.*

## F. Syntheses of Alcohols 40 and 43

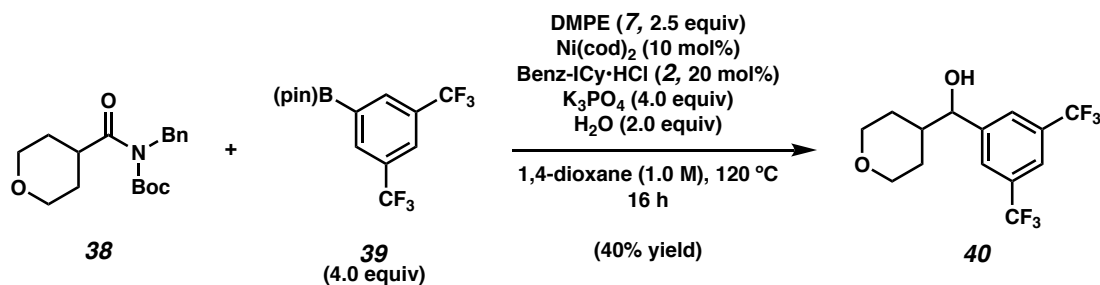

**Alcohol 40.** Crude alcohol **40** was synthesized following General Procedure B. Purification by flash column chromatography (19:1 Hexanes:EtOAc → 3:1 Hexanes:EtOAc) afforded alcohol **40** (40% yield, average of two experiments) as a clear oil. Alcohol **40**:  $R_f$  0.45 (2:1 Hexanes:EtOAc); <sup>1</sup>H NMR (500 MHz, CDCl<sub>3</sub>): δ 7.81 (s, 1H), 7.78 (s, 2H), 4.58 (dd,  $J = 6.9$ , 3.5, 1H), 4.03 (app dd,  $J = 11.6$ , 4.3, 1H), 3.95 (app dd,  $J = 11.6$ , 4.2, 1H), 3.36 (td,  $J = 12.1$ , 2.0), 3.32 (td,  $J = 12.1$ , 2.0) (2H total), 2.08 (d,  $J = 3.5$ , 1H), 1.90–1.80 (m, 1H), 1.79–1.72 (m, 1H), 1.49 (qd, 12.3, 4.6), 1.43 (qd,  $J = 12.3$ , 4.7) (2H total), 1.29–1.19 (m, 1H); <sup>13</sup>C NMR (125 MHz, CDCl<sub>3</sub>): δ 145.6, 131.8 (q,  $J = 33$ ), 126.8, 126.7, 124.5, 122.3, 121.8 (sept,  $J = 3.7$ ), 77.5, 67.8, 67.6, 42.6, 29.1, 28.4; IR (film): 3401, 2956, 2855, 1277, 1128 cm<sup>-1</sup>; HRMS-APCI ( $m/z$ ) [M + H]<sup>+</sup> calcd for C<sub>14</sub>H<sub>15</sub>F<sub>6</sub>O<sub>2</sub><sup>+</sup>, 329.09708; found 329.09637.

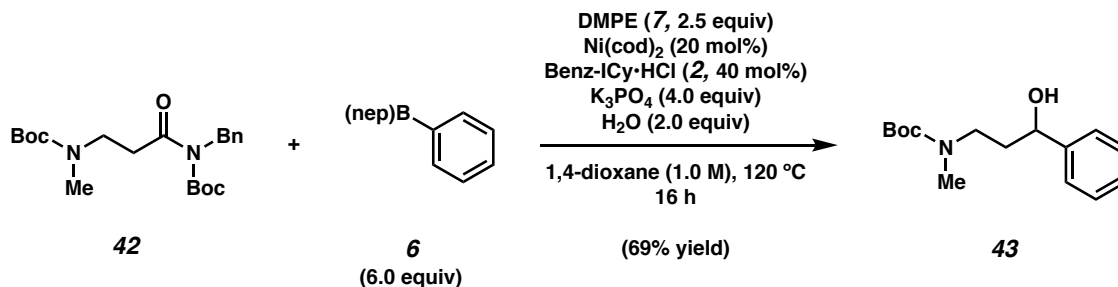

**Alcohol 43.** Crude alcohol **43** was synthesized following General Procedure B. Purification by flash column chromatography (PhH → 9:1 PhH:Acetone) yield alcohol **43** (69% yield, average of two experiments) as a clear oil. Alcohol **43**:  $R_f$  0.48 (2:1 Hexanes:EtOAc); <sup>1</sup>H NMR (400 MHz, CDCl<sub>3</sub>): δ 7.42–7.18 (m, 5H), 4.60 (br s, 1H), 4.33 (br s), 3.90 (br s), 3.47 (br s), 3.30–

2.92 (m), 2.50 (br s), (total 3H), 2.87 (s, 3H), 2.00–1.88 (m, 1H), 1.88–1.67 (m, 1H), 1.47 (s, 9H). Spectral data match those previously reported.<sup>15</sup>

*Note: 43 was obtained as a mixture of rotamers. These data represent empirically observed chemical shifts from the <sup>1</sup>H NMR spectrum.*

### G. Syntheses of Authentic Samples of Alcohols 13 and 37

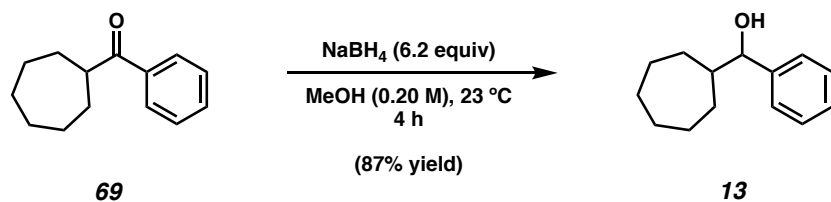

To a flame-dried 1-dram vial equipped with a magnetic stir bar was added the ketone **69** (11.4 mg, 0.0560 mmol, 1.00 equiv) in MeOH. The solvent was then evaporated under reduced pressure. The vial was then capped with a septum cap, and the atmosphere was purged with N<sub>2</sub>. To the vial was added MeOH (0.300 mL, 0.190 M) and the reaction was stirred to give a homogeneous solution. NaBH<sub>4</sub> (6.80 mg, 0.180 mmol, 3.20 equiv) was added in a single portion and the vial was stirred at 23 °C. After 1 h, NaBH<sub>4</sub> (6.40 mg, 0.170 mmol, 3.00 equiv) was added in a single portion and the vial was stirred at 23 °C. After 3 h, the reaction was quenched with H<sub>2</sub>O (2 mL). The aqueous layer was extracted with EtOAc (4 x 3 mL), the combined organic layers were dried over anhydrous MgSO<sub>4</sub>, and the volatiles were removed under reduced pressure. The resulting crude residue was purified by preparative thin-layer chromatography (5:1 Hexanes:EtOAc) to yield alcohol **13** as a clear oil (10.0 mg, 87% yield).

*Note: See section D for chemical shifts from the <sup>1</sup>H NMR and <sup>13</sup>C NMR spectra.*

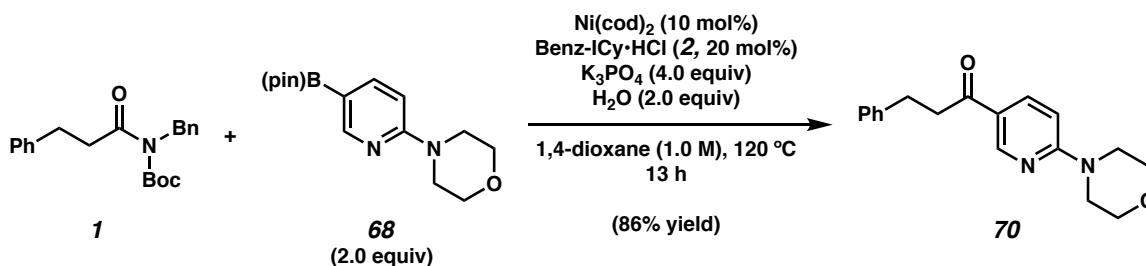

A 1-dram vial was charged with anhydrous powder  $\text{K}_3\text{PO}_4$  (170 mg, 0.800 mmol, 4.00 equiv) and a magnetic stir bar. The vial and its contents were flame-dried under reduced pressure and allowed to cool under  $\text{N}_2$ . Amide substrate **1** (67.9 mg, 0.200 mmol, 1.00 equiv) and boronate ester nucleophile **68** (116 mg, 0.400 mmol, 2.00 equiv) were added. The vial was flushed with  $\text{N}_2$  for 5 min, then water (7.21  $\mu\text{L}$ , 0.400 mmol, 2.00 equiv), which had been sparged with  $\text{N}_2$  for 10 min, was added. The vial was taken into a glovebox and charged with  $\text{Ni}(\text{cod})_2$  (5.50 mg, 10 mol%) and Benz-ICy·HCl (**2**, 12.8 mg, 20 mol%). Subsequently, 1,4-dioxane (200  $\mu\text{L}$ , 1.00 M) was added. The vial was sealed with a Teflon-lined screw cap, removed from the glovebox, and stirred vigorously (800 RPM) at 120 °C for 13 h. After cooling to 23 °C, the mixture was quenched by the addition of saturated aqueous  $\text{NH}_4\text{Cl}$  (1 mL) and extracted with EtOAc (3 x 2 mL). The combined organic layers were then filtered over a plug of silica gel (3 cm) and  $\text{Na}_2\text{SO}_4$  (3 cm) using EtOAc (10 mL) as eluent. The volatiles were removed under reduced pressure and the resulting crude residue was purified by flash column chromatography (9:1 Hexanes:EtOAc  $\rightarrow$  EtOAc) to yield ketone **70** as a clear oil (10.0 mg, 87% yield). Alcohol **70**:  $^1\text{H}$  NMR (500 MHz,  $\text{CDCl}_3$ ):  $\delta$  8.78 (d,  $J = 2.3$ , 1H), 8.05 (dd,  $J = 9.1, 2.3$ , 1H), 7.32–7.28 (m, 2H), 7.26–7.18 (m, 3H), 6.60 (d,  $J = 9.1$ , 1H), 3.81 (t,  $J = 5.0$ , 4H), 3.67 (t,  $J = 5.0$ , 4H), 3.19 (t,  $J = 7.5$ , 4H), 3.05 (t,  $J = 7.5$ , 4H). Spectral data match those previously reported.<sup>16</sup>

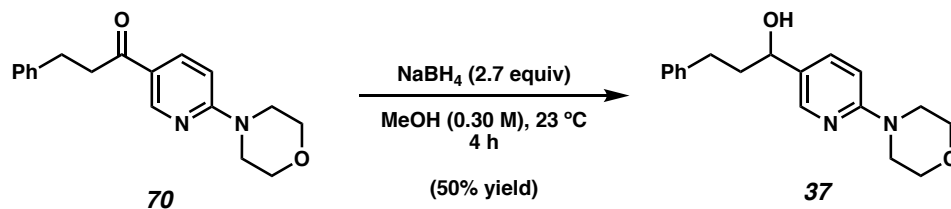

To a flame-dried 1-dram vial equipped with a magnetic stir bar was added  $\text{NaBH}_4$  (17.0 mg, 0.450 mmol, 2.70 equiv). The ketone **70** (50.0 mg, 0.0170 mmol, 1.00 equiv) was dissolved in MeOH (0.60 mL, 0.30 M) and added to the vial. After 1 h, the reaction was quenched with  $\text{H}_2\text{O}$  (2 mL). The aqueous layer was extracted with EtOAc (4 x 3 mL), the combined organic layers were dried over anhydrous  $\text{NaSO}_4$ , and the volatiles were removed under reduced pressure. The resulting crude residue was purified by preparative TLC (1:1 Hexanes:EtOAc) to yield alcohol **37** as a clear oil (25.0 mg, 50% yield).

*Note: See section E for chemical shifts from the  $^1\text{H}$  NMR and  $^{13}\text{C}$  NMR spectra.*

## H. Robustness Screen

Table S2: Evaluation of Functional Group Compatibility in the Suzuki–Miyaura Coupling and Transfer Hydrogenation Cascade

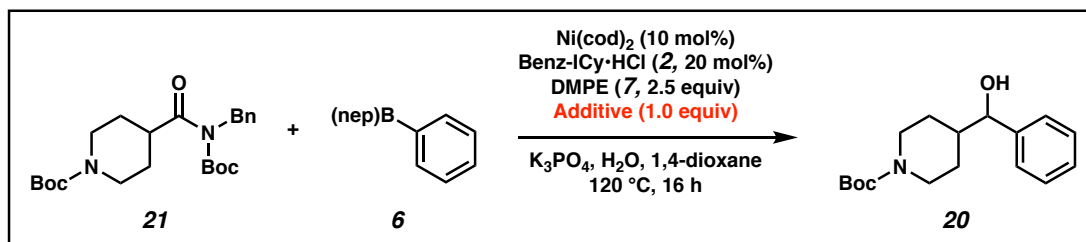

| Entry | Additive | Yield of <b>20</b> (%) | Additive Remaining (%) | SM Remaining (%) | Entry | Additive | Yield of <b>20</b> (%) | Additive Remaining (%) | SM Remaining (%) |
|-------|----------|------------------------|------------------------|------------------|-------|----------|------------------------|------------------------|------------------|
| 1     | –        | 81                     | N.D.                   | 0                | 9     |          | 13                     | 0                      | 0                |
| 2     |          | 89                     | >99                    | 0                | 10    |          | 58                     | 88                     | 0                |
| 3     |          | 83                     | >99                    | 0                | 11    |          | 68                     | 0                      | 0                |
| 4     |          | 42                     | N.D. <sup>b</sup>      | 0                | 12    |          | 22                     | 18                     | 0                |
| 5     |          | 43                     | 0                      | 0                | 13    |          | 88                     | 98                     | 0                |
| 6     |          | 0                      | 0                      | 0                | 14    |          | 68                     | 94                     | 0                |
| 7     |          | 0                      | 0                      | 0                | 15    |          | 25                     | 0                      | 0                |
| 8     |          | 31                     | 0                      | 0                | 16    |          | 78                     | 80                     | 0                |

Conditions: amide **21** (0.20 mmol, 1.00 equiv), PhB(nep) (**6**, 0.80 mmol, 4.00 equiv), DMPE (**7**, 0.50 mmol, 2.50 equiv), additive (0.20 mmol, 1.00 equiv),  $\text{Ni}(\text{cod})_2$  (0.020 mmol, 10 mol%), Benz-ICy·HCl (**2**, 0.040 mmol, 20 mol%),  $\text{K}_3\text{PO}_4$  (0.80 mmol, 4.00 equiv),  $\text{H}_2\text{O}$  (0.40 mmol, 2.00 equiv), and 1,4-dioxane (1.0 M) in a sealed vial at 120 °C for 16 h. Yields of coupled product, remaining additive, and remaining starting material were determined by  $^1\text{H}$  NMR analysis using 1,3,5-trimethoxybenzene or hexamethylbenzene as an external standard.

## I. Benchtop Variants of Methodology

**Procedure A: Employing a paraffin wax encapsulation approach.** Note: The supporting information for the preparation of Ni(cod)<sub>2</sub>/Benz-ICy–paraffin capsules has been previously reported.<sup>17</sup>

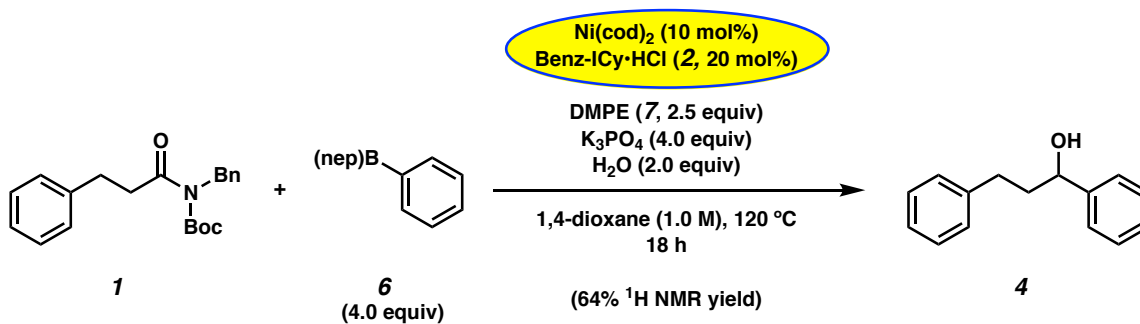

A 2-dram vial was charged with anhydrous powder K<sub>3</sub>PO<sub>4</sub> (340 mg, 1.60 mmol, 4.00 equiv) and a magnetic stir bar (egg-shaped 3/8 x 3/16 in). The vial and its contents were flame-dried under reduced pressure and allowed to cool under N<sub>2</sub>. The vial was then charged with amide substrate **1** (136 mg, 0.40 mmol, 1.00 equiv), boronate ester nucleophile **6** (304 mg, 1.60 mmol, 4.00 equiv), DMPE (**7**, 165 mg, 1.00 mmol, 2.50 equiv), and a paraffin wax capsule containing Ni(cod)<sub>2</sub> (11.0 mg, 0.0400 mmol, 10 mol%) and Benz-ICy•HCl (**2**, 25.5 mg, 0.0800 mmol, 20 mol%) were added. The vial was purged with N<sub>2</sub> and subsequently deionized water (14.0 μL, 0.80 mmol, 2.00 equiv) and 1,4-dioxane (0.400 mL, 1.00 M), which had been sparged with N<sub>2</sub> for 10 min, were added. The vial was capped with a Teflon-lined screw cap under a flow of N<sub>2</sub> and the reaction mixture was stirred vigorously (800 RPM) at 120 °C for 18 h. After removing the vial from heat, the reaction mixture was transferred to a 100 mL pear-shaped flask containing 2.0 g of silica gel with hexanes (6 mL) and CH<sub>2</sub>Cl<sub>2</sub> (6 mL). The mixture was adsorbed onto the silica gel under reduced pressure and filtered over a plug of silica gel (4.0 cm OD x 3.0 cm, 300 mL of hexanes eluent to remove paraffin, then 250 mL of EtOAc eluent). The volatiles were removed under reduced pressure. <sup>1</sup>H NMR analysis of the crude reaction mixture indicated a 64% yield of alcohol **4** relative to 1,3,5-trimethoxybenzene external standard (average of two experiments).

**Procedure B: Employing an air-stable Ni(II) precatalyst**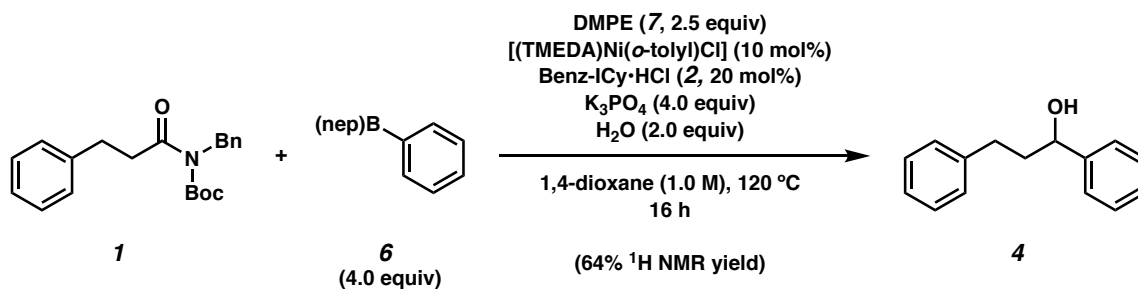

A 1-dram vial was charged with anhydrous powder K<sub>3</sub>PO<sub>4</sub> (170 mg, 0.800 mmol, 4.00 equiv) and a magnetic stir bar. The vial and its contents were flame-dried under reduced pressure and allowed to cool under N<sub>2</sub>. Amide substrate **1** (67.9 mg, 0.200 mmol, 1.00 equiv), boronate ester nucleophile **6** (152 mg, 0.800 mmol, 4.00 equiv), DMPE (**7**, 82.6 mg, 0.500 mmol, 2.50 equiv), [(TMEDA)Ni(*o*-tolyl)Cl]<sup>3</sup> (6.03 mg, 0.0200 mmol, 10 mol%), and Benz-ICy·HCl (**2**, 12.8 mg, 0.0400 mmol, 20 mol%) were added. The vial was flushed with N<sub>2</sub> for 5 min, then water (7.21 μL, 0.400 mmol, 2.00 equiv) and 1,4-dioxane (200 μL, 1.00 M), which had been sparged with N<sub>2</sub> for 10 min, were added. The vial was capped with a Teflon-lined screw cap under a flow of N<sub>2</sub> and the reaction mixture was stirred vigorously (800 RPM) at 120 °C for 16 h. After cooling to 23 °C, the mixture was quenched by the addition of saturated aqueous NH<sub>4</sub>Cl (1 mL) and extracted with EtOAc (3 x 2 mL). The combined organic layers were then filtered over a plug of silica gel (3 cm) and Na<sub>2</sub>SO<sub>4</sub> (3 cm) using EtOAc (10 mL) as eluent. The volatiles were removed under reduced pressure. <sup>1</sup>H NMR analysis of the crude reaction mixture indicated a 64% yield of alcohol **4** relative to 1,3,5-trimethoxybenzene external standard.



## J. Enantioselectivity Experiments

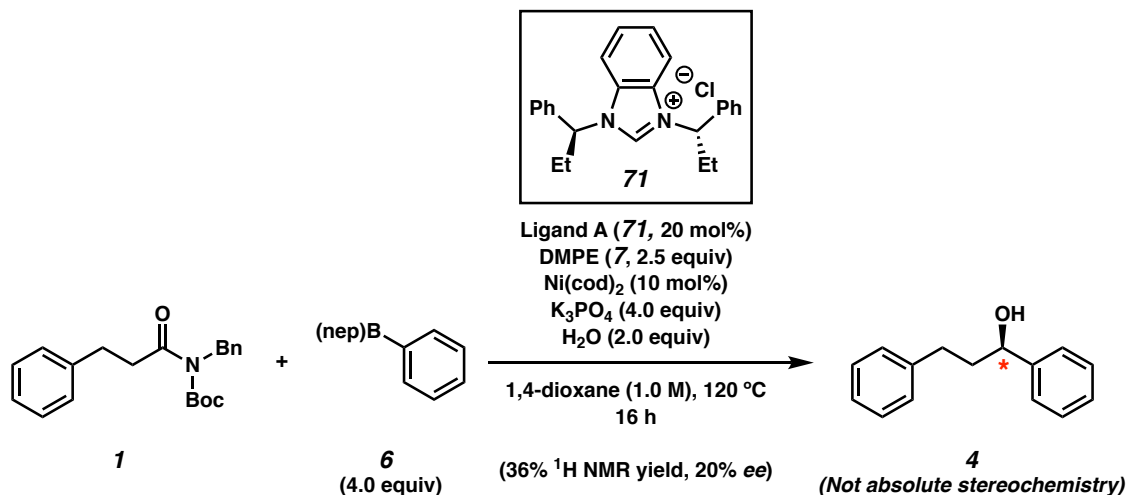

A 1-dram vial was charged with anhydrous powder K<sub>3</sub>PO<sub>4</sub> (170 mg, 0.800 mmol, 4.00 equiv) and a magnetic stir bar. The vial and its contents were flame-dried under reduced pressure and allowed to cool under N<sub>2</sub>. Amide substrate **1** (67.9 mg, 0.200 mmol, 1.00 equiv), boronate ester nucleophile **6** (152 mg, 0.800 mmol, 4.00 equiv), and DMPE (**7**, 82.6 mg, 0.500 mmol, 2.50 equiv) were added. The vial was flushed with N<sub>2</sub> for 5 min, then water (7.21 μL, 0.400 mmol, 2.00 equiv), which had been sparged with N<sub>2</sub> for 10 min, was added. The vial was taken into a glovebox and charged with Ni(cod)<sub>2</sub> (5.50 mg, 0.0200 mmol, 10 mol%) and Ligand A (**71**, 15.6 mg, 0.0400 mmol, 20 mol%). Subsequently, 1,4-dioxane (200 μL, 1.00 M) was added. The vial was sealed with a Teflon-lined screw cap, removed from the glovebox, and stirred vigorously (800 RPM) at 120 °C for 16 h. After cooling to 23 °C, the mixture was quenched by the addition of saturated aqueous NH<sub>4</sub>Cl (1 mL) and extracted with EtOAc (3 x 2 mL). The combined organic layers were then filtered over a plug of silica gel (3 cm) and Na<sub>2</sub>SO<sub>4</sub> (3 cm) using EtOAc (10 mL) as eluent. <sup>1</sup>H NMR analysis of the crude reaction mixture indicated a 36% yield of alcohol **4** relative to 1,3,5-trimethoxybenzene external standard. Purification by preparative thin-layer chromatography (4:1 Hexanes:EtOAc) provided an analytical sample of enantioenriched alcohol **4** as a clear oil. The spectral data match those previously reported in section D of Experimental Procedures for *rac*-**4**.

## K. Verification of Enantioenrichment.

## Chiral SFC Assay

| Compound                                                                                                      | Method<br>Column/Temp.         | Solvent                                 | Method<br>Flow Rate | Retention<br>Times<br>(min) | Enantiomeric<br>Ratio<br>(er) |
|---------------------------------------------------------------------------------------------------------------|--------------------------------|-----------------------------------------|---------------------|-----------------------------|-------------------------------|
| 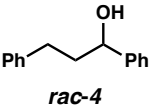<br><i>rac-4</i>             | Daicel ChiralPak<br>AD-H/35 °C | 1%<br>isopropanol in<br>CO <sub>2</sub> | 3.5 mL/min          | 7.35/8.12                   | 50:50                         |
| <br><i>enantioenriched-4</i> | Daicel ChiralPak<br>AD-H/35 °C | 1%<br>isopropanol in<br>CO <sub>2</sub> | 3.5 mL/min          | 7.43/8.12                   | 40:60                         |

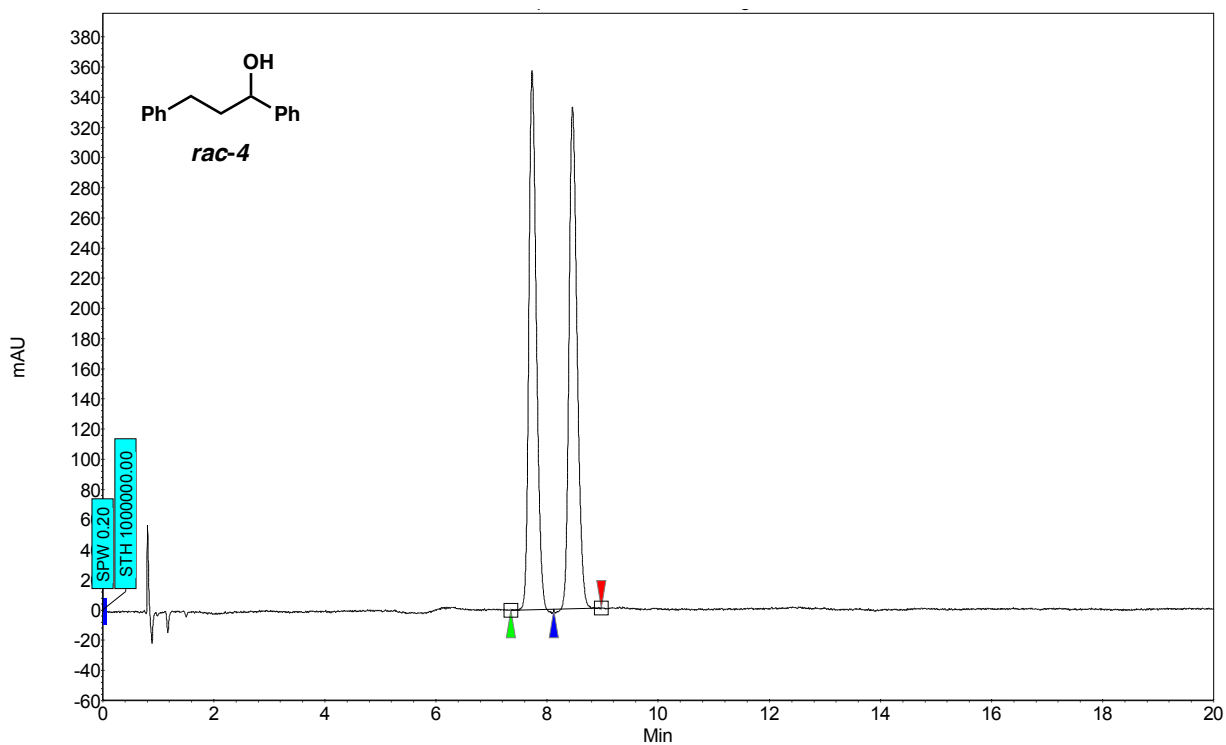

| Index | Name    | Start | Time  | End   | RT Offset | Quantity | Height     | Area           | Area    |
|-------|---------|-------|-------|-------|-----------|----------|------------|----------------|---------|
|       |         | [Min] | [Min] | [Min] | [Min]     | [% Area] | [ $\mu$ V] | [ $\mu$ V.Min] | [%]     |
| 1     | UNKNOWN | 7.35  | 7.73  | 8.12  | 0.00      | 49.91    | 357.5      | 55.6           | 49.913  |
| 2     | UNKNOWN | 8.12  | 8.46  | 8.98  | 0.00      | 50.09    | 332.4      | 55.8           | 50.087  |
| Total |         |       |       |       |           | 100.00   | 689.9      | 111.4          | 100.000 |

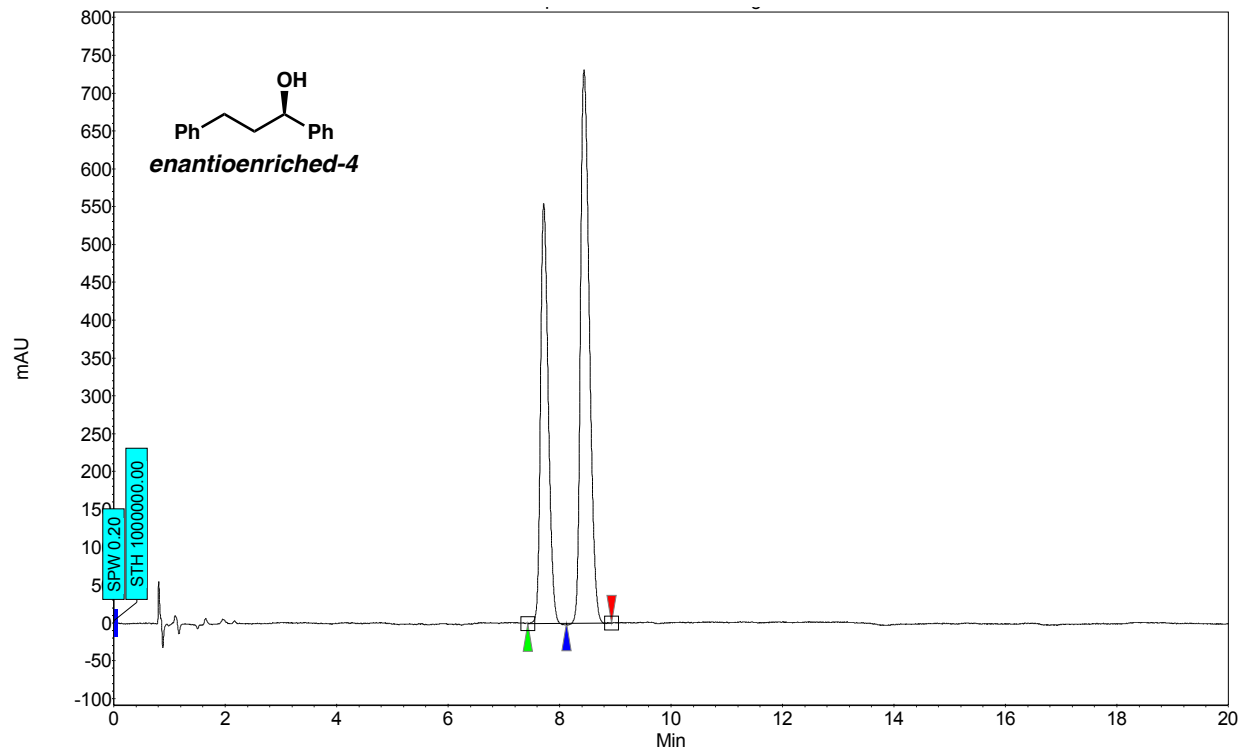

| Index | Name    | Start | Time  | End   | RT Offset | Quantity | Height     | Area           | Area    |
|-------|---------|-------|-------|-------|-----------|----------|------------|----------------|---------|
|       |         | [Min] | [Min] | [Min] | [Min]     | [% Area] | [ $\mu$ V] | [ $\mu$ V.Min] | [%]     |
| 1     | UNKNOWN | 7.43  | 7.72  | 8.12  | 0.00      | 39.72    | 554.9      | 88.6           | 39.725  |
| 2     | UNKNOWN | 8.12  | 8.44  | 8.94  | 0.00      | 60.28    | 731.0      | 134.5          | 60.275  |
| Total |         |       |       |       |           | 100.00   | 1285.9     | 223.1          | 100.000 |

## L. Deuterium Incorporation Experiments

### A. Preparation of deuterated reducing agent *d*-DMPE (*d*-7)

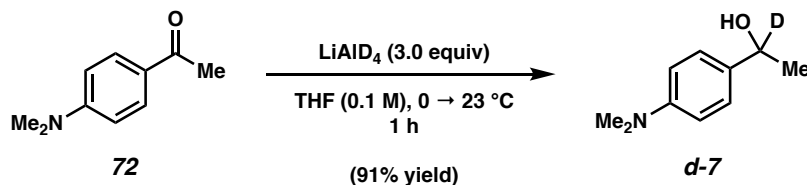

To a flame-dried flask equipped with a magnetic stir bar was added ketone **72** (50.0 mg, 0.307 mmol, 1.00 equiv) and THF (3.0 mL, 0.10 M). The flask was cooled to 0 °C and lithium aluminum deuteride (39 mg, 0.921 mmol, 3.00 equiv) was added in a single portion. The reaction was then warmed to 23 °C and stirred for 1 h. The reaction was cooled to 0 °C and quenched by the sequential addition of MeOH (5 mL), and deionized water (3 mL) and the resulting mixture was transferred to a separatory funnel with CH<sub>2</sub>Cl<sub>2</sub> (10 mL) and water (10 mL). The aqueous layer was extracted with CH<sub>2</sub>Cl<sub>2</sub> (3 x 10 mL), then the organic layers were combined, dried over Na<sub>2</sub>SO<sub>4</sub>, and evaporated under reduced pressure. Purification of the crude residue by flash chromatography (4:1 Hexanes:EtOAc) afforded deuterated alcohol ***d*-7** (46 mg, 91% yield) as a white solid. Alcohol ***d*-7**: R<sub>f</sub> 0.33 (3:1 Hexanes:EtOAc). <sup>1</sup>H NMR (500 MHz, CDCl<sub>3</sub>): δ 7.26 (d, *J* = 9.0, 2H), 6.73 (d, *J* = 9.0, 2H), 2.94 (s, 3 H), 1.62 (s, 1H), 1.48 (s, 3H).

### A. Deuterium incorporation experiments using *d*-DMPE (*d*-7).

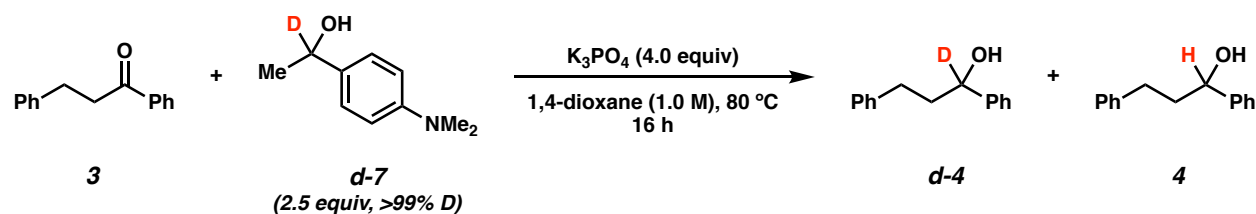

| Conversion | Yield of <i>d</i> -4 | Yield of 4 |
|------------|----------------------|------------|
| 75%        | 75%                  | 0%         |

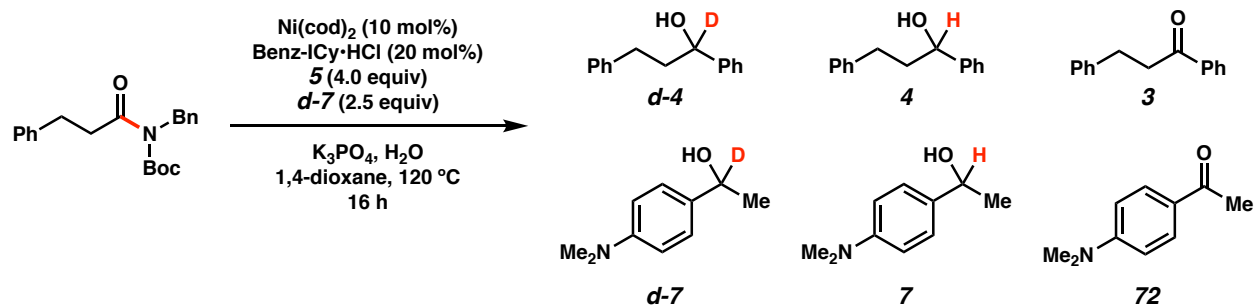

| Conversion | Yield<br><i>d-4</i> | Yield<br><i>4</i> | Yield<br><i>3</i> | Yield<br><i>d-7</i> | Yield<br><i>7</i> | Yield<br><i>72</i> |
|------------|---------------------|-------------------|-------------------|---------------------|-------------------|--------------------|
| 100%       | 0%                  | 72%               | 15%               | 58%                 | 1%                | 30%                |

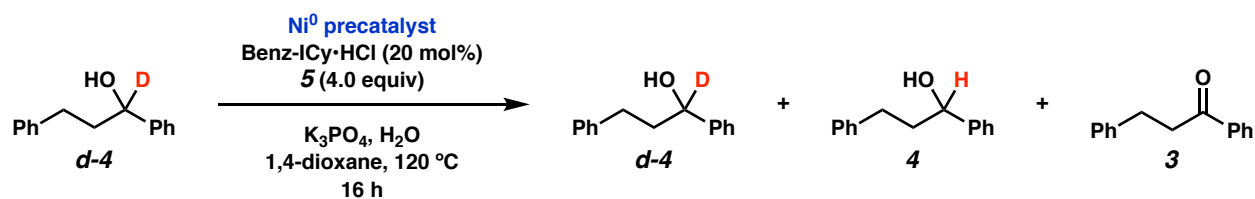

| Ni <sup>0</sup> precatalyst    | Yield<br><i>d-4</i> | Yield<br><i>4</i> | Yield<br><i>3</i> |
|--------------------------------|---------------------|-------------------|-------------------|
| None                           | 95%                 | 0%                | 0%                |
| Ni(cod) <sub>2</sub> (10 mol%) | 12%                 | 22%               | 20%               |

## References

- <sup>1</sup> Boit, T. B.; Mehta, M. M.; Garg, N. K. Base-mediated Meerwein–Ponndorf–Verley reduction of aromatic and heteroaromatic ketones. *Org. Lett.* **2019**, *21*, 6447–6451.
- <sup>2</sup> Fier, P. S.; Luo, J.; Hartwig, J. F. Copper-mediated fluorination of arylboronate esters. Identification of a copper(III) fluoride complex. *J. Am. Chem. Soc.* **2013**, *135*, 2552–2559
- <sup>3</sup> Shields, J. D.; Gray, E. E.; Doyle, A. G. A modular air-stable nickel precatalyst. *Org. Lett.* **2020**, *17*, 2166–2169.
- <sup>4</sup> He, W.; Zhao, W.; Zhou, B.; Liu, H.; Li, X.; Li, L.; Li, J.; Shi, J. Synthesis of C<sub>2</sub>-symmetric benzimidazolium salts and their application in palladium-catalyzed enantioselective intramolecular  $\alpha$ -arylation of amides. *Molecules* **2016**, *21*, 742–748.
- <sup>5</sup> Hie, L.; Baker, E. L.; Anthony, S. M.; Desrosiers, J. -N.; Senanayake, C.; Garg, N. K. Nickel-catalyzed esterification of aliphatic amides. *Angew. Chem., Int. Ed.*, **2016**, *65*, 15129–15132.
- <sup>6</sup> Boit, T. B.; Weires, N. A.; Kim, J.; Garg, N. K. Nickel-catalyzed Suzuki–Miyaura coupling of aliphatic amides. *ACS Catal.* **2018**, *8*, 1003–1008.
- <sup>7</sup> Dander, J. E.; Baker, E. L.; Garg, N. K. Nickel-catalyzed transamidation of aliphatic amide derivatives. *Chem. Sci.* **2017**, *8*, 6433–6438.
- <sup>8</sup> Lamani, M.; Ravikumara, G. S.; Prabhu, K. R. Iron(III) chloride-catalysed aerobic reduction of olefins using aqueous hydrazine at ambient temperature. *Adv. Synth. Catal.* **2012**, *354*, 1437–1442.
- <sup>9</sup> Genc, S.; Arslan, B.; Gulcemal, S.; Gunnaz, S.; Cetinkaya, B.; Gulcemal, D. Iridium(I)-catalyzed C–C and C–N bond forming reactions via the borrowing hydrogen strategy. *J. Org. Chem.* **2019**, *84*, 6286–6297.
- <sup>10</sup> Rahaim, R. J.; Maleczka, R. E. C–O hydrogenolysis catalyzed by Pd-PMHS nanoparticles in the company of chloroarenes. *Org. Lett.* **2011**, *13*, 584–587.
- <sup>11</sup> Kabalka, G. W.; Wu, Z.; Ju, W. Alkylation of aromatic aldehydes with alkylboron chloride derivatives. *Tetrahedron*, **2001**, *57*, 1663–1670.
- <sup>12</sup> Gaykar, R. N.; Bhunia, A.; Biju, A. T. Employing arynes for the generation of aryl anion equivalents and subsequent reaction with aldehydes. *J. Org. Chem.* **2018**, *83*, 11333–11340.
- <sup>13</sup> Orjales, A.; Mosquera, R.; Toledo, A.; Pumar, M. C.; Garcia, N.; Cortizo, L.; Labeaga, L.; Innerarity, A. Syntheses and binding studies of new [(aryl)(aryloxy)methyl]piperidine

derivatives and related compounds as potential antidepressant drugs with high affinity for serotonin (5-HT) and norepinephrine (NE) transporters. *J. Med. Chem.* **2003**, *46*, 5512–5532.

<sup>14</sup> Van Orden, L. J.; Van Dyke, P. M.; Saito, D. R.; Church, T. J.; Chang, R.; Smith, J. A. M.; Martin, W. J.; Jaw-Tsai, S.; Strangeland, E. L. A novel class of 3-(phenoxy-phenyl-methyl)-pyrrolidines as potent and balanced norepinephrine and serotonin reuptake inhibitors: synthesis and structure-activity relationships. *Bioorg & Med Chem. Lett.* **2013**, *23*, 1456–1461.

<sup>15</sup> Jakobsson, J. E.; Gronnevik, G.; Riss, P. J. Organocatalyst-assisted Ar–<sup>18</sup>F bond formation: a universal procedure for direct aromatic radiofluorination. *Chem. Commun.* **2017**, *53*, 12906–12909.

<sup>16</sup> Perner, R. J.; Gu, Y.-G.; Lee, C.-H.; Bayburt, E. K.; McKie, J.; Alexander, K. M.; Kohlhaas, K. L.; Wismer, C. T.; Mikusa, J.; Jarvis, M. F.; Kowaluk, E. A.; Bhagwat, S. S. 5,6,7-Trisubstituted 4-Aminopyrido[2,3-*d*]pyrimidines as novel inhibitors of adenosine kinase. *J. Med. Chem.* **2003**, *46*, 5249–5257.

<sup>17</sup> Mehta, M. M.; Boit, T. B.; Dander, J. E.; Garg, N. K. Ni-catalyzed Suzuki–Miyaura cross-coupling of aliphatic amides on the benchtop. *Org. Lett.* **2020**, *22*, 1–5.

# <sup>1</sup>H NMR Spectra



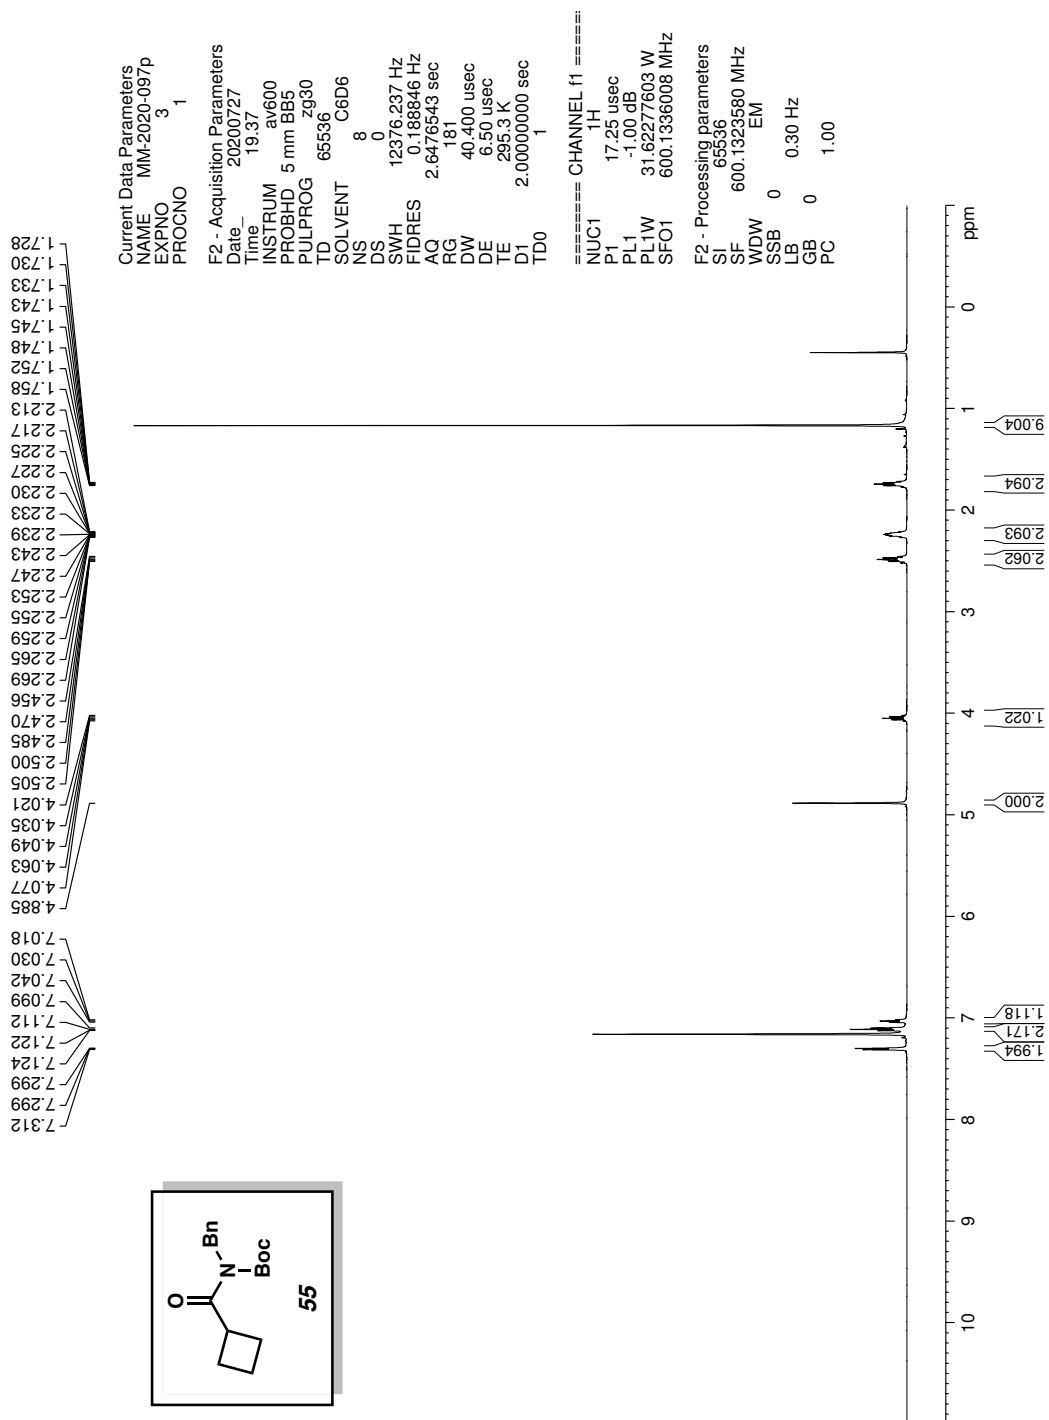

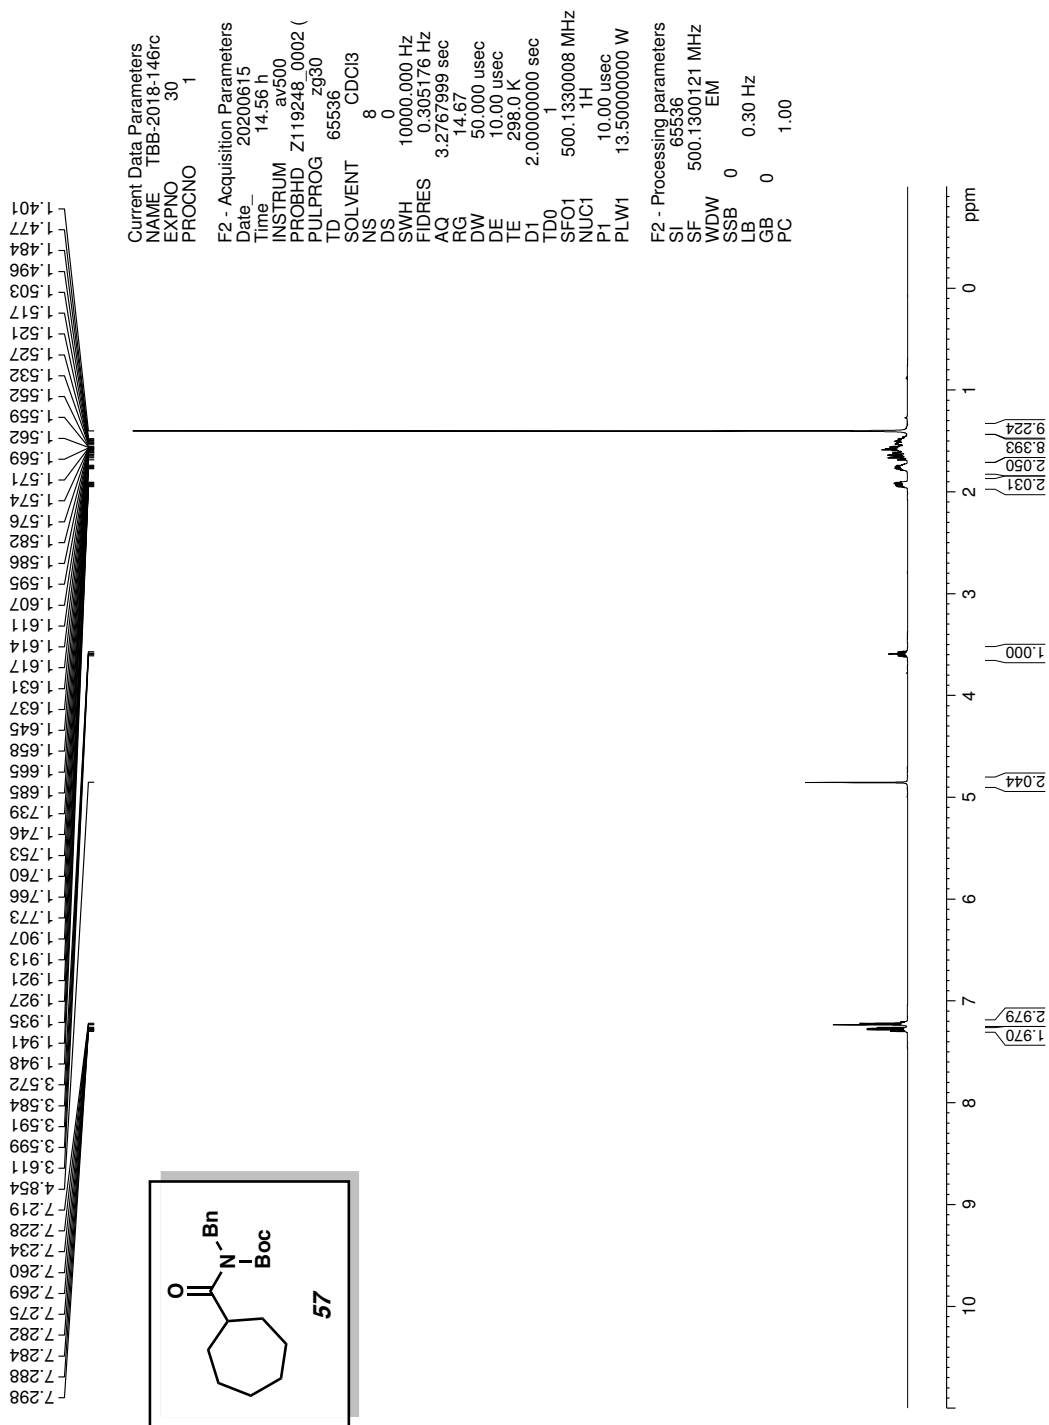

Current Data Parameters  
 NAME TBB-2020-075p  
 EXPNO 20  
 PROGNO 1

F2 - Acquisition Parameters  
 Date\_ 20200731  
 Time 8.21 h  
 INSTRUM av500  
 PROBHD Z119248\_0002 (Zg30)  
 PULPROG zg30  
 TD 65536  
 SOLVENT CDCI3  
 NS 8  
 DS 0  
 SWH 10000.000 Hz  
 FIDRES 0.305176 Hz  
 AQ 3.2767999 sec  
 RG 14.67  
 DW 50.000 usec  
 DE 10.00 usec  
 TE 298.0 K  
 D1 2.00000000 sec  
 TD0 1  
 SFO1 500.1330008 MHz  
 NUC1 1H  
 P1 10.00 usec  
 PLW1 13.50000000 W

F2 - Processing parameters  
 SI 65536  
 SF 500.1300121 MHz  
 WDW EM  
 SSB 0  
 LB 0.30 Hz  
 GB 0  
 PC 1.00

1.403  
 1.448

2.861  
 3.146  
 3.550

4.867

7.225  
 7.234  
 7.240  
 7.260  
 7.273  
 7.285  
 7.302

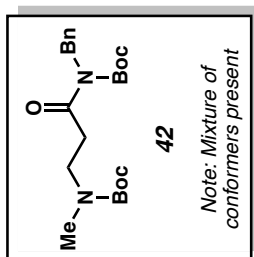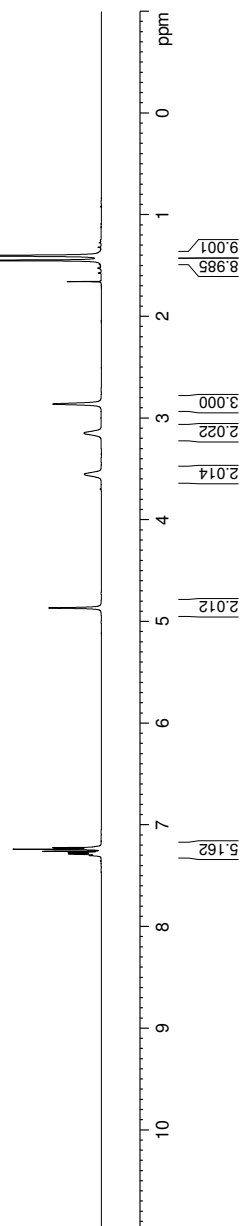

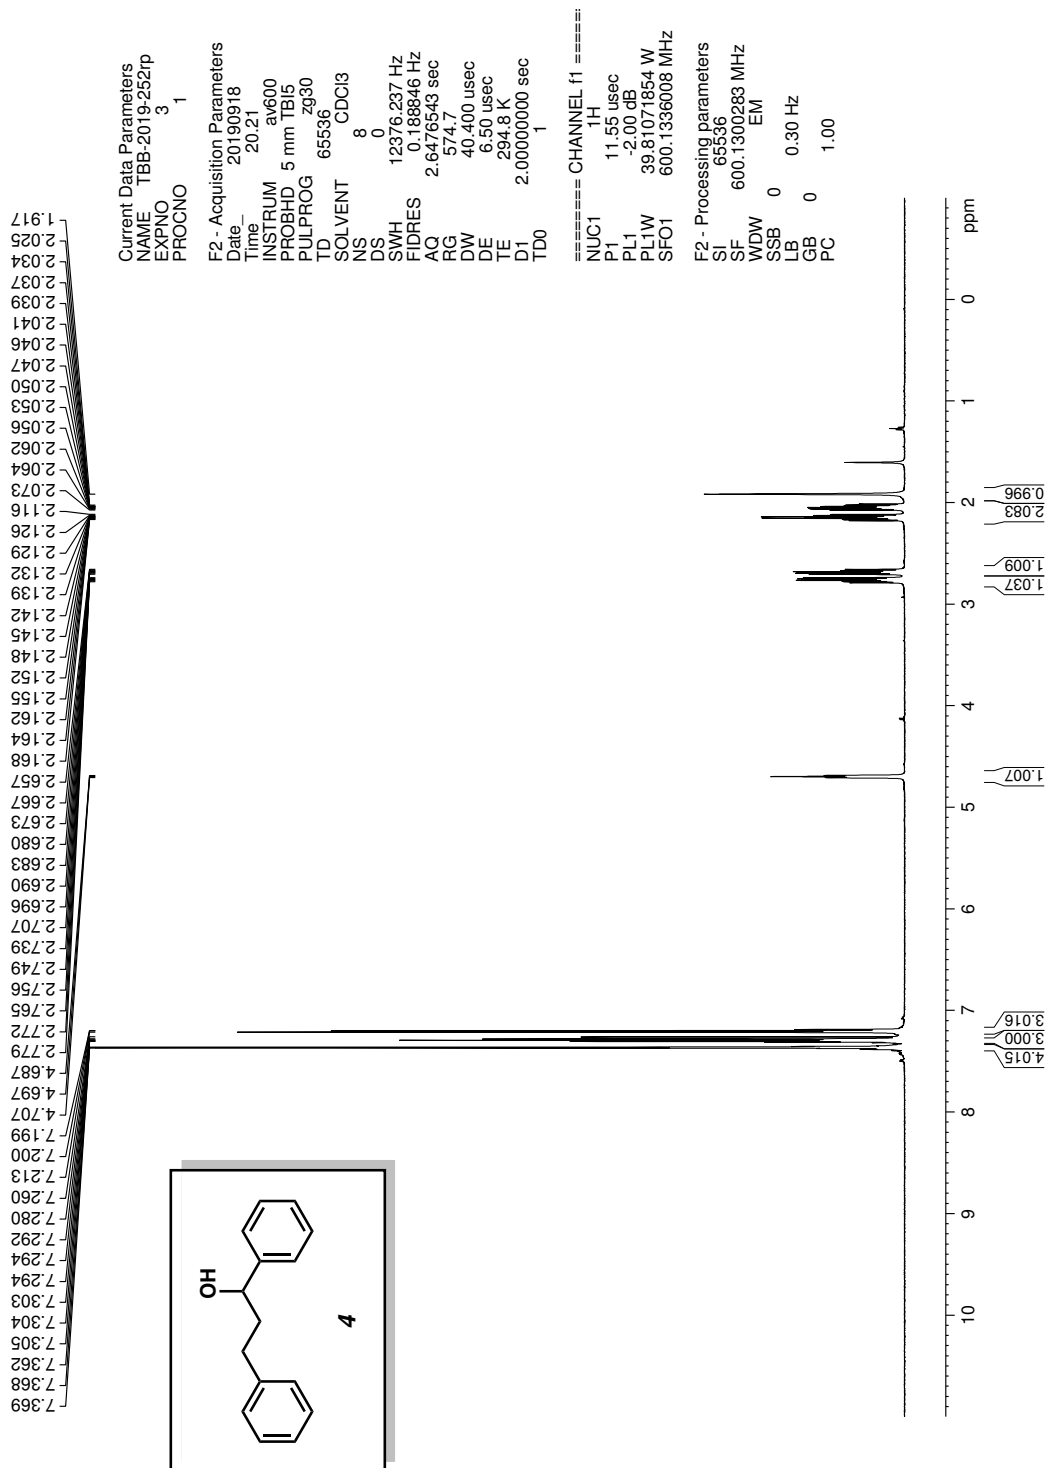

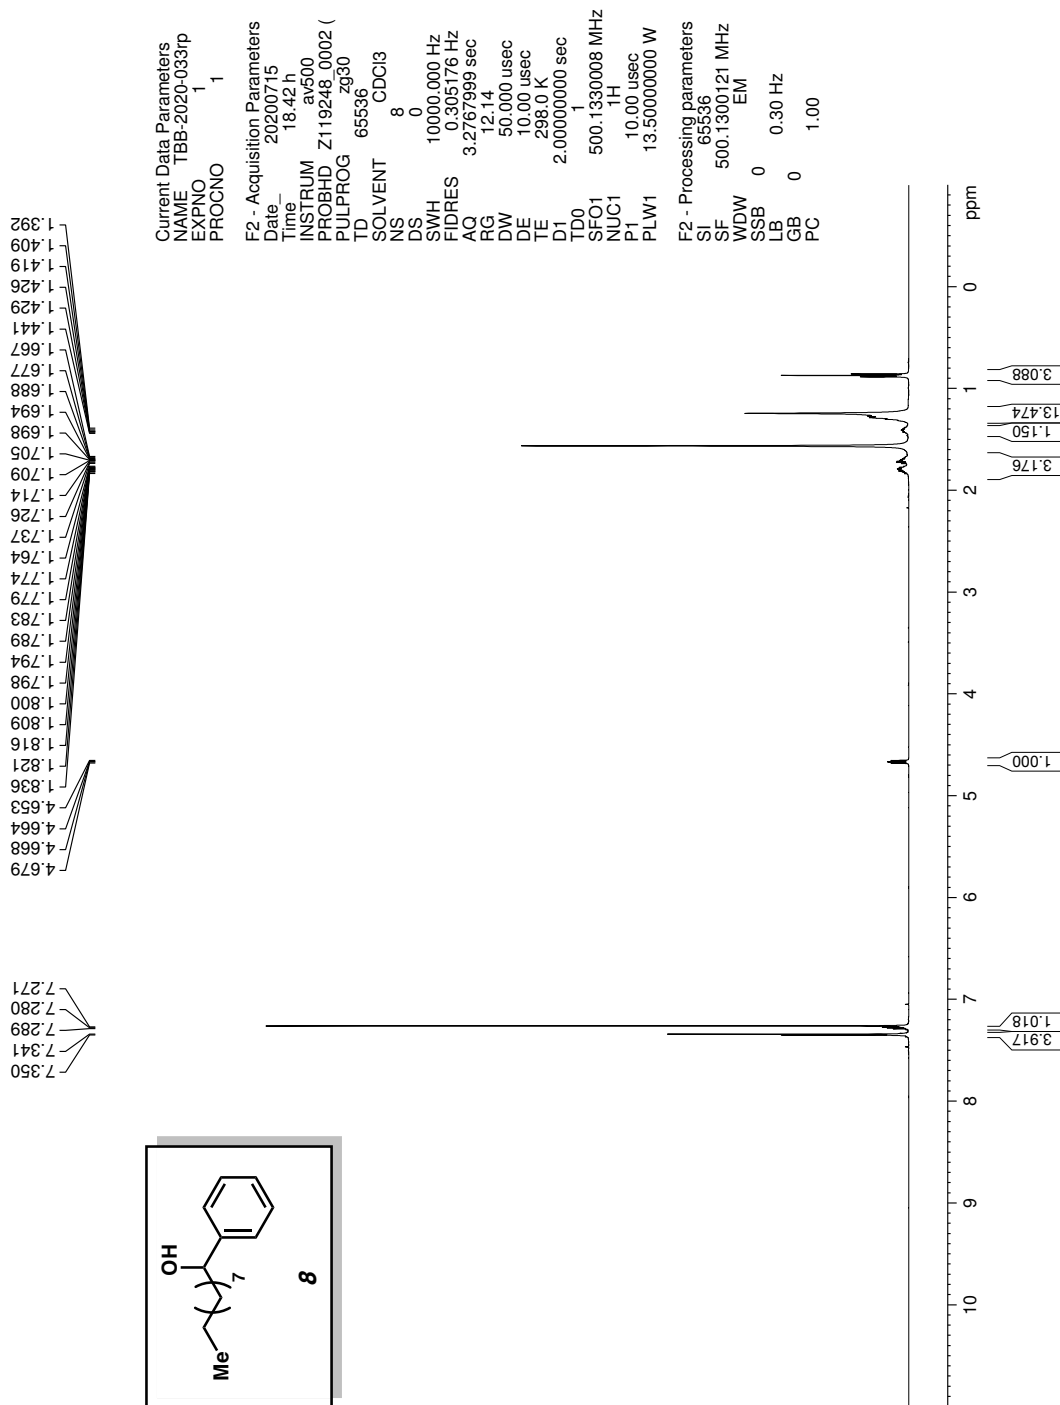

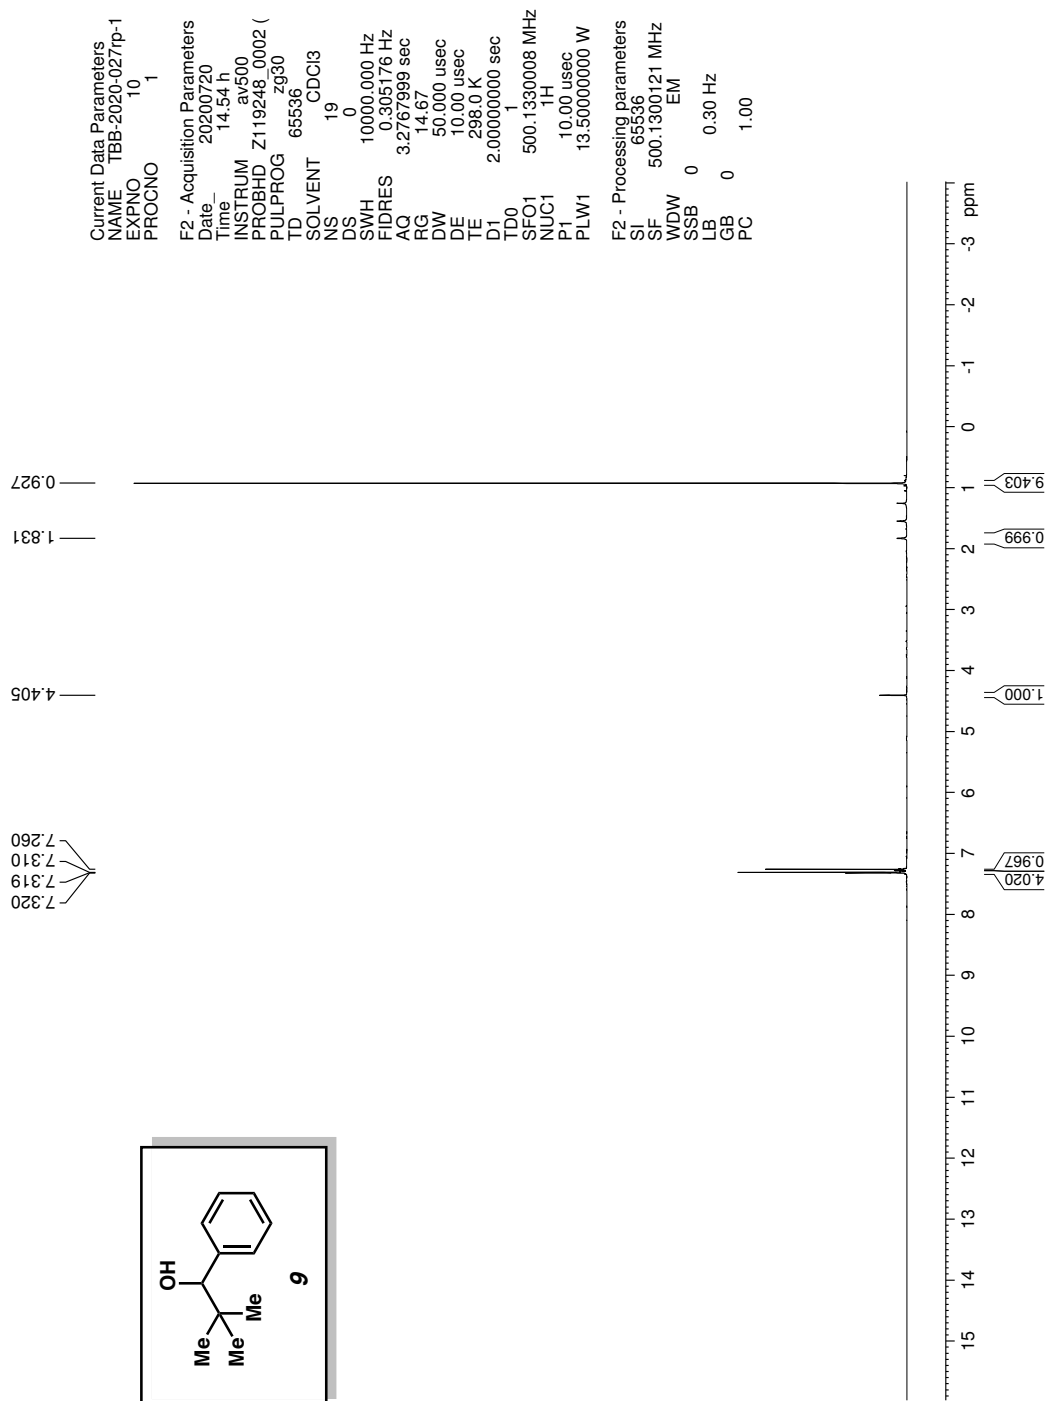

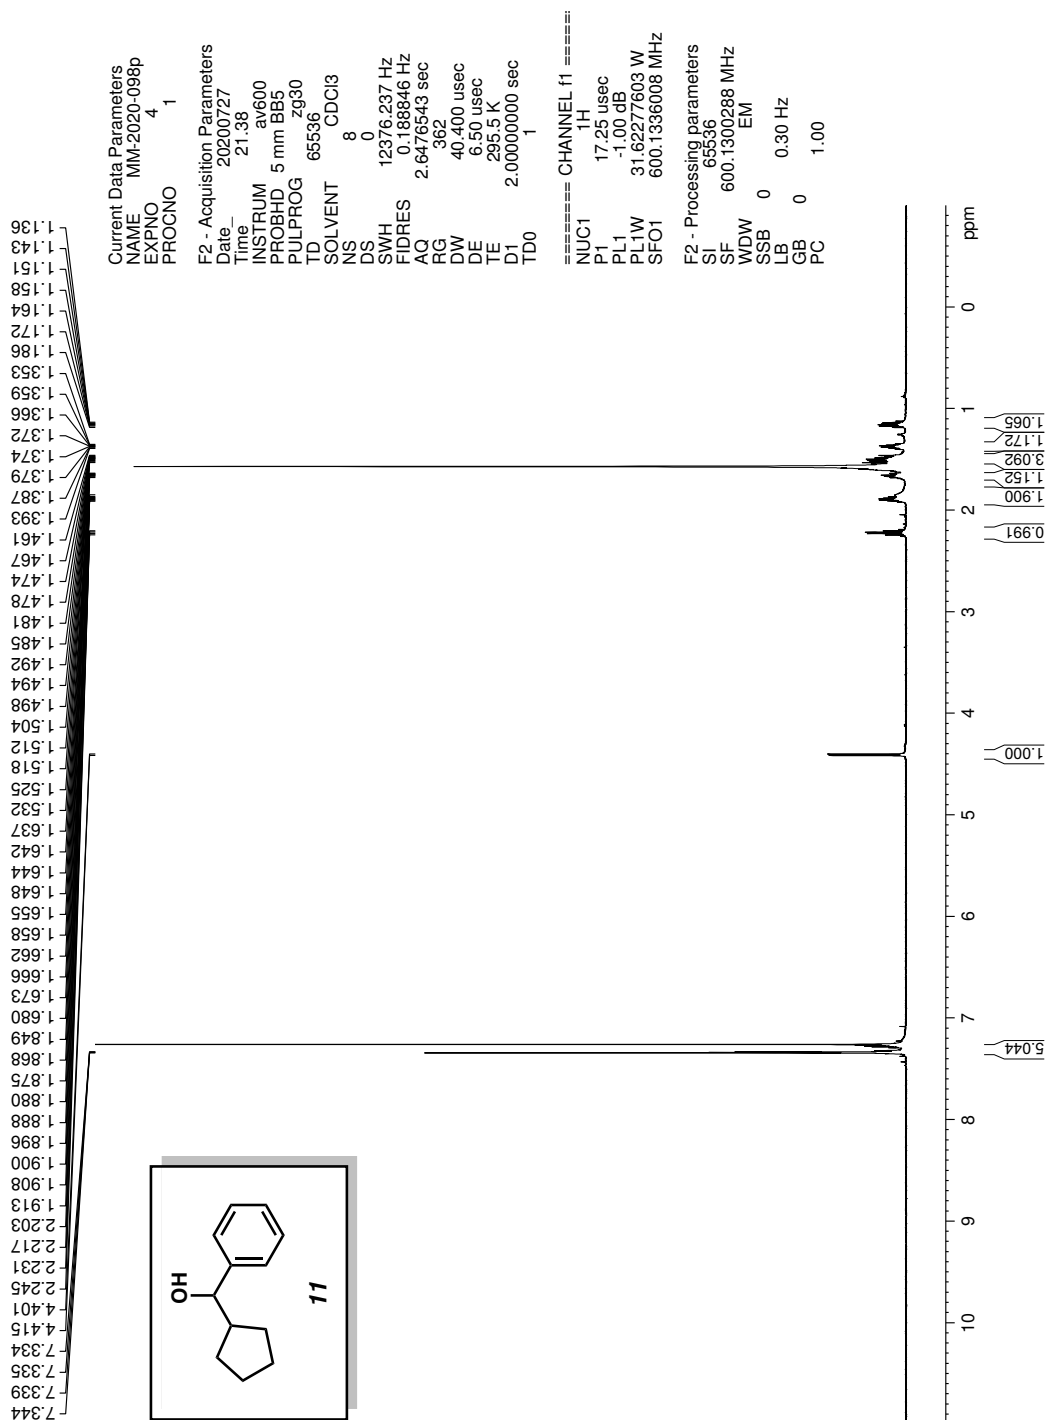

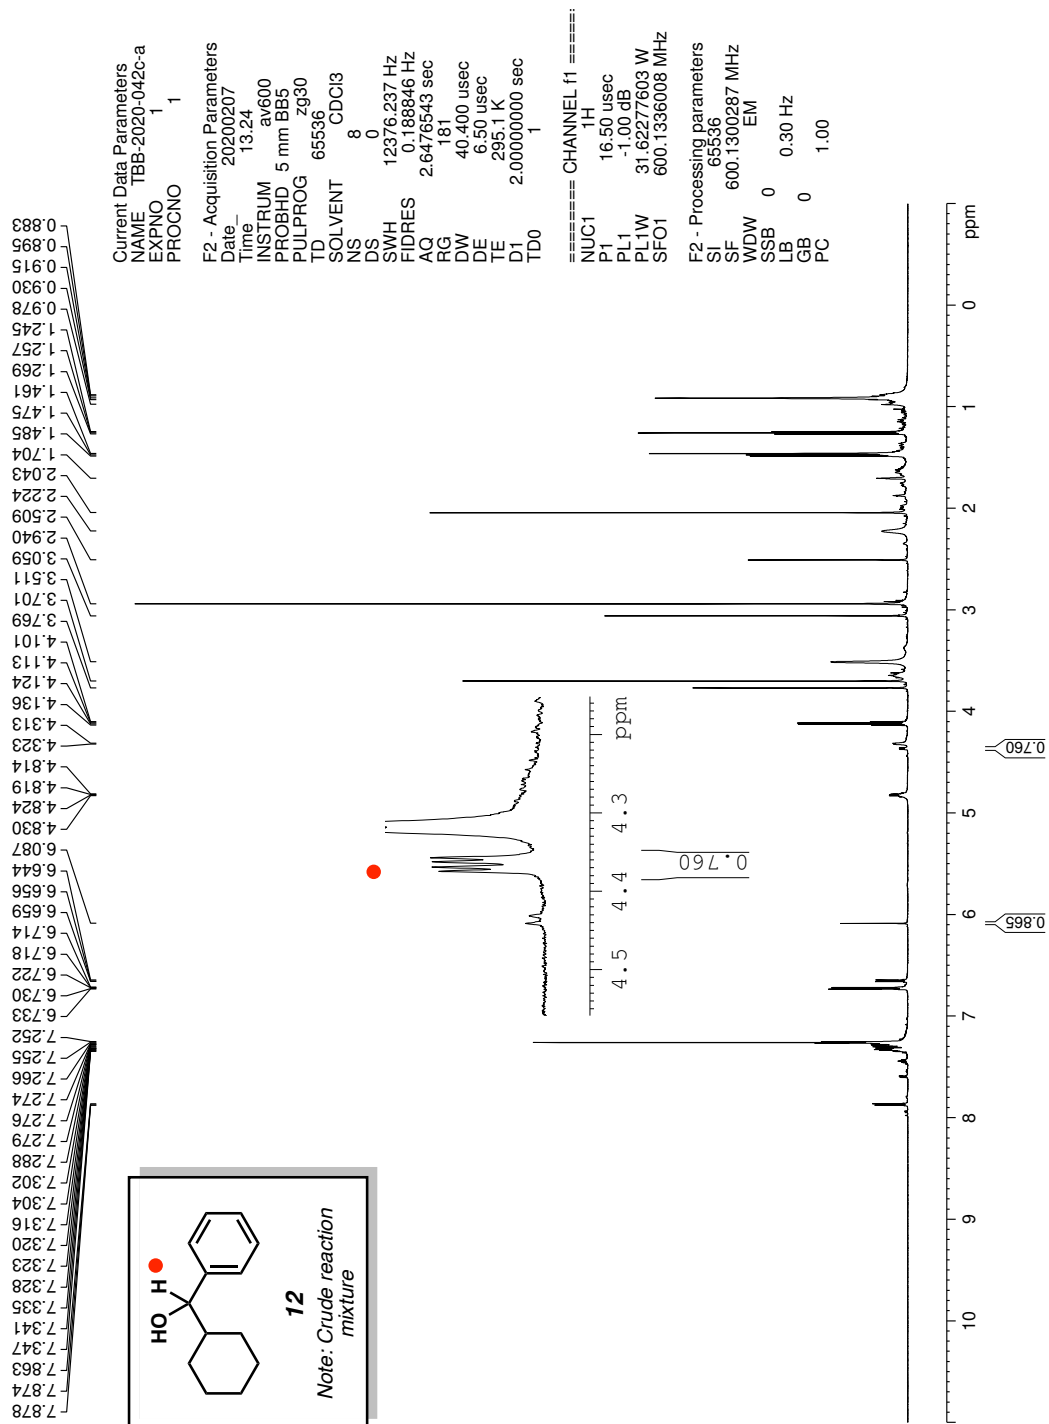



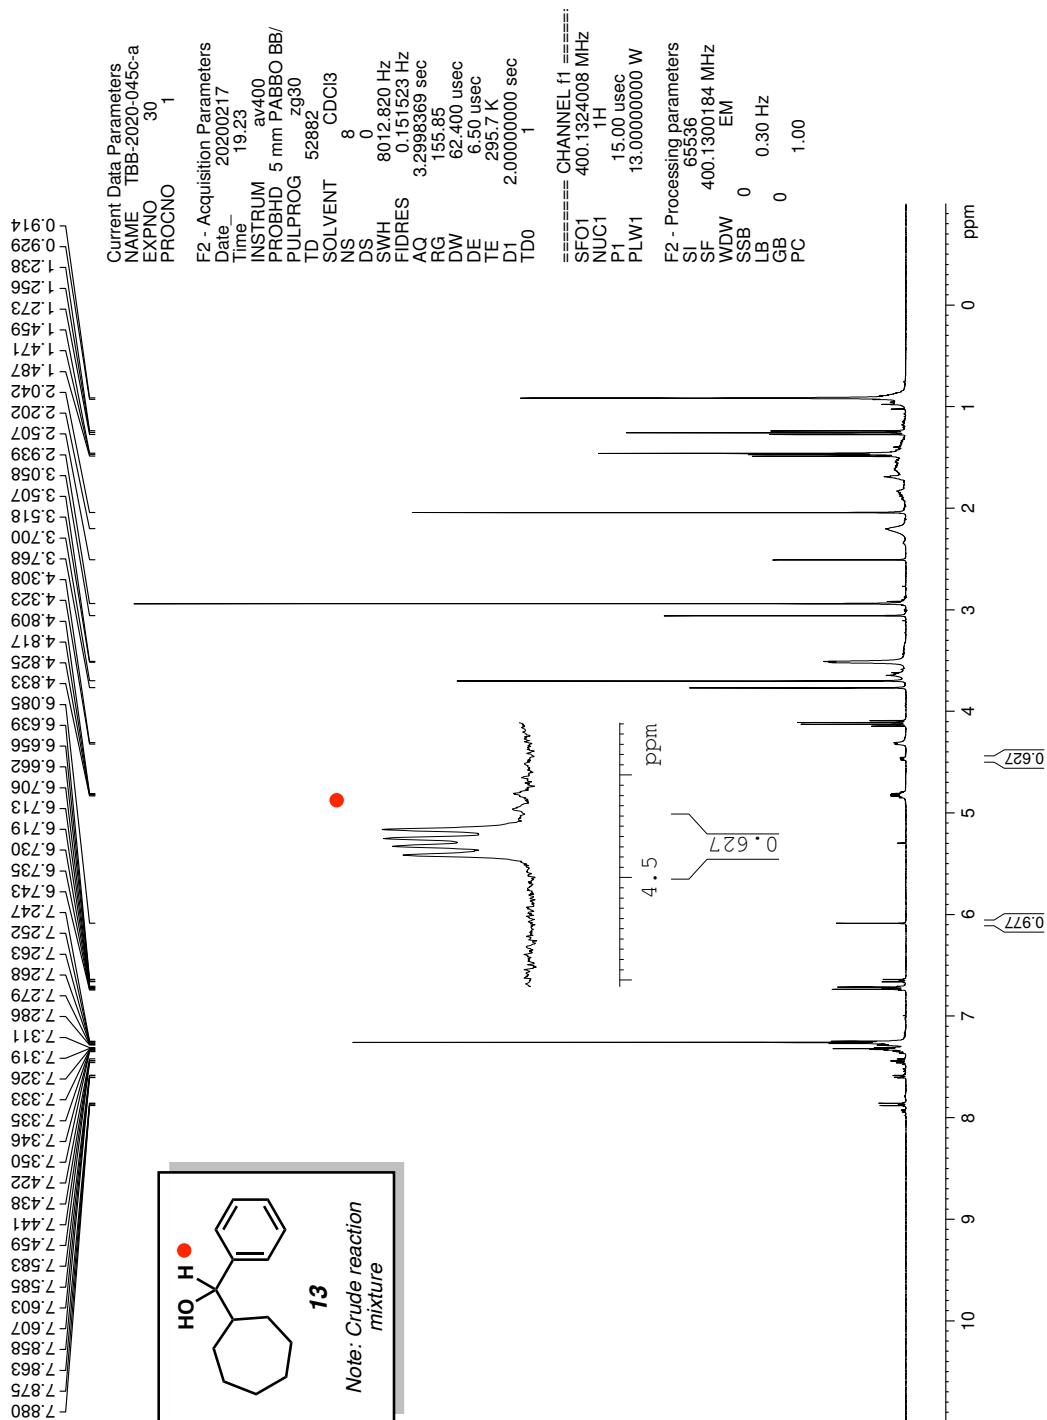

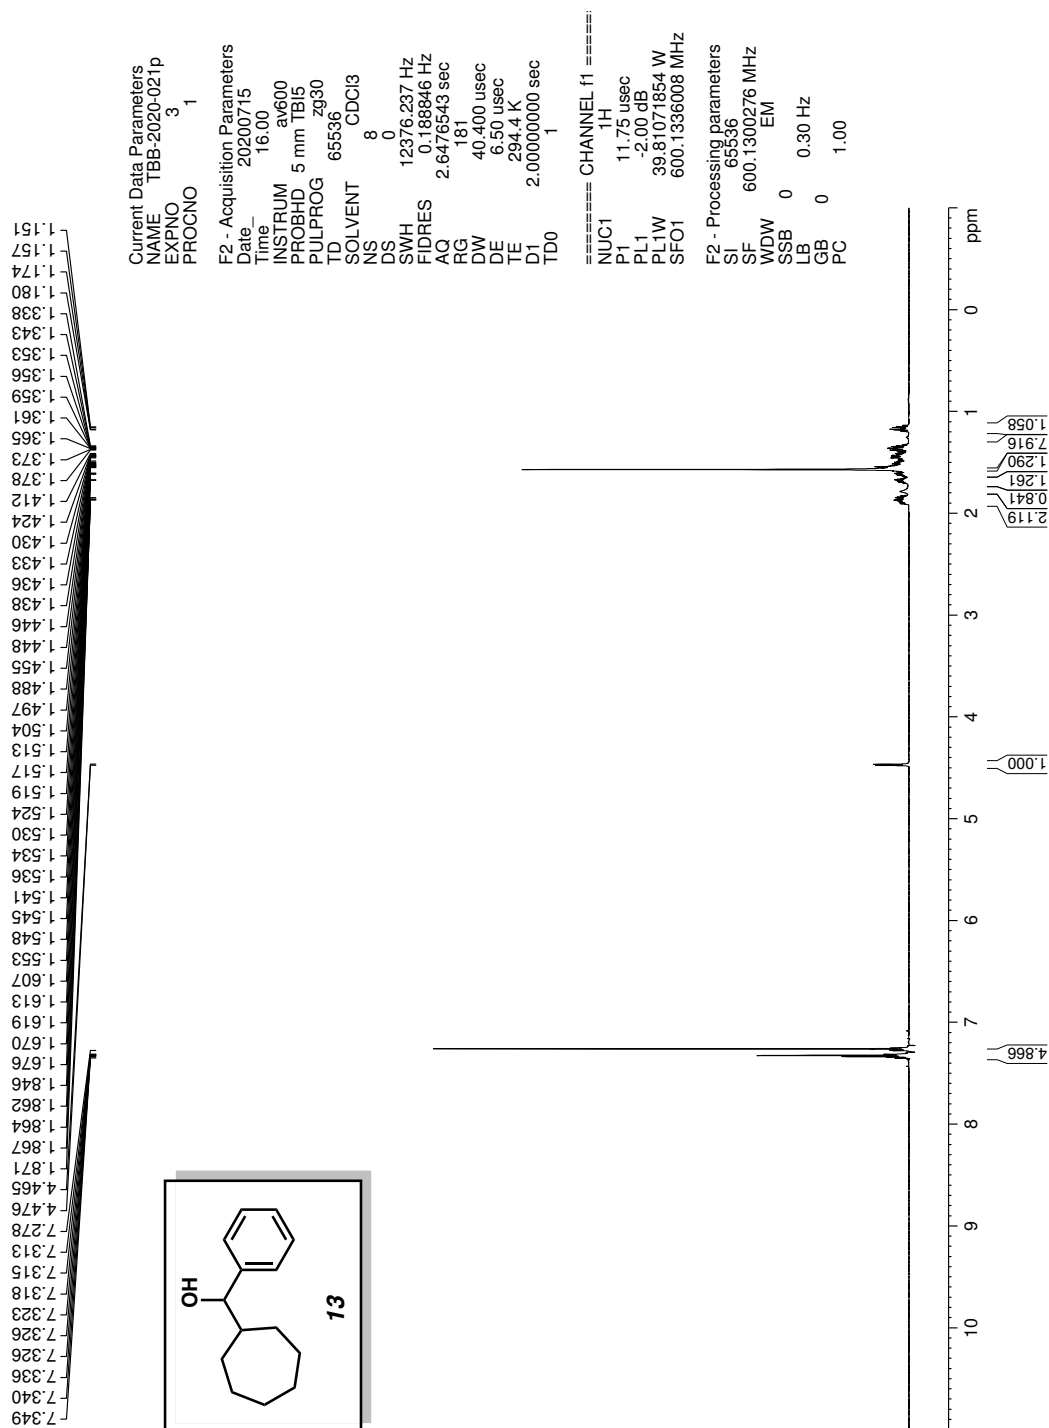

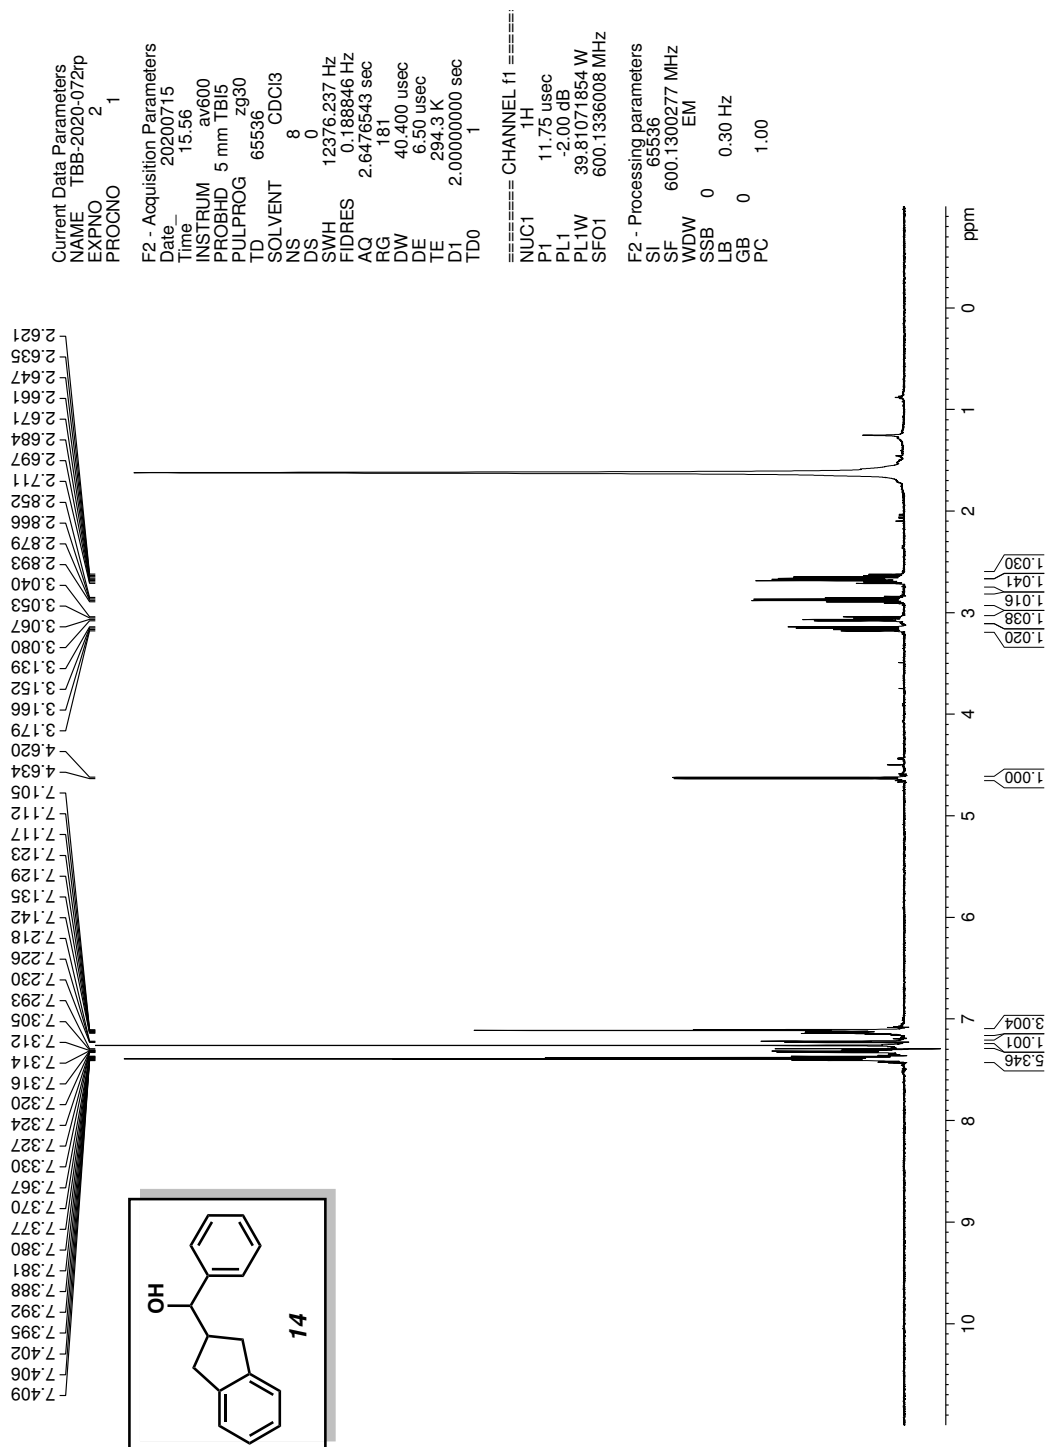

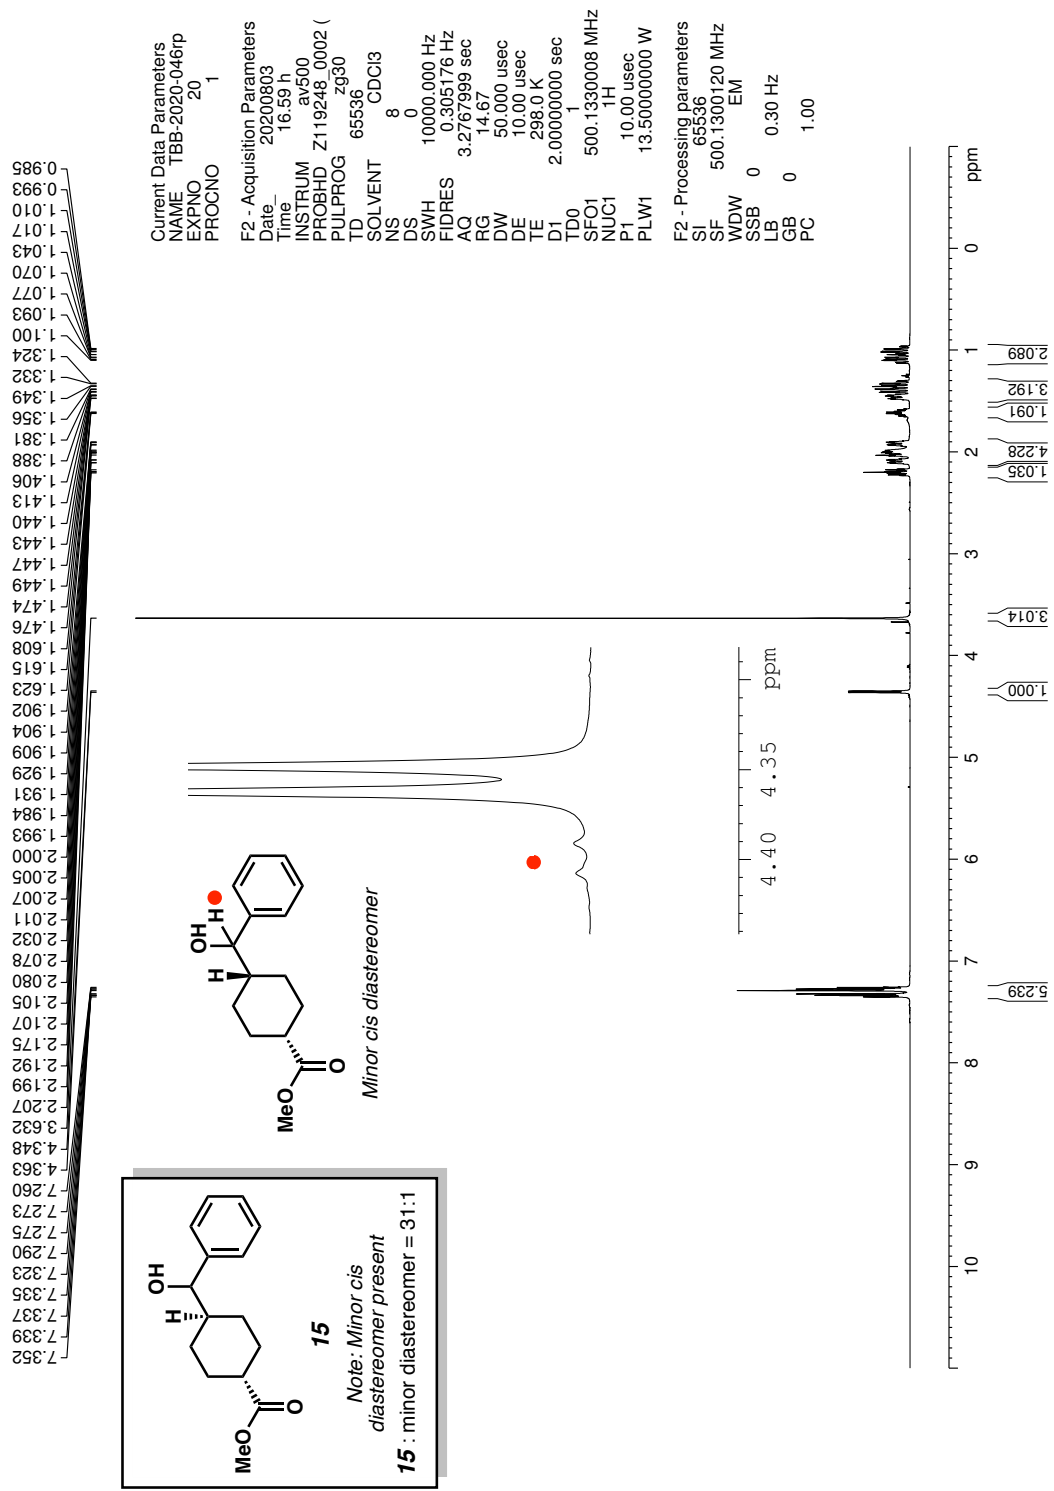

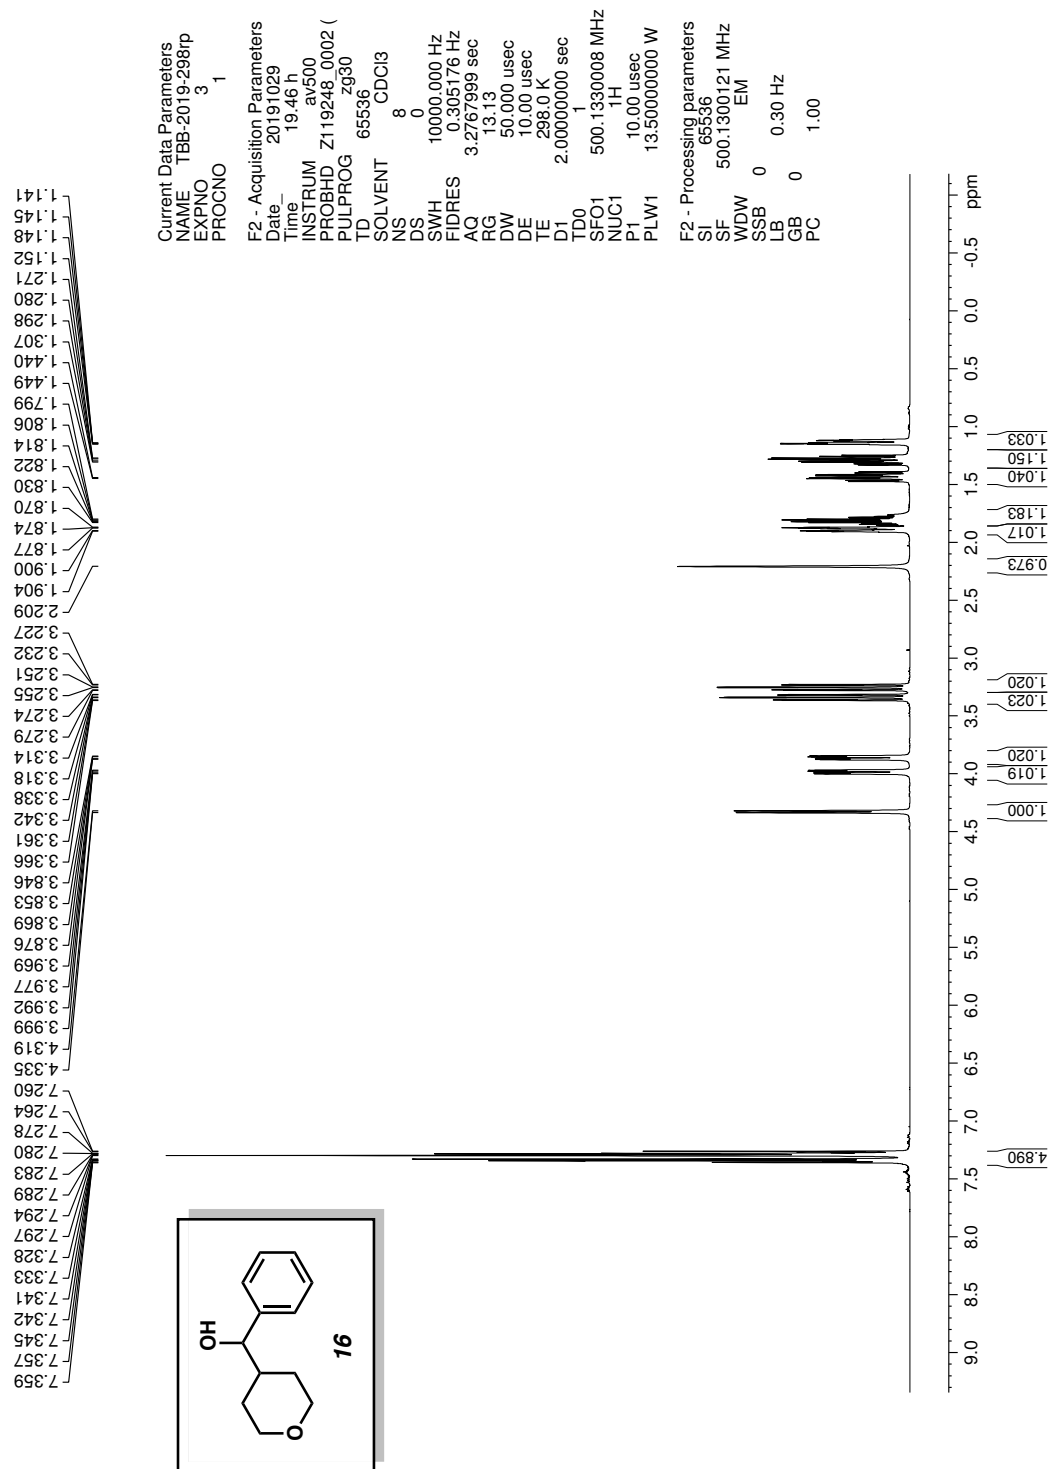

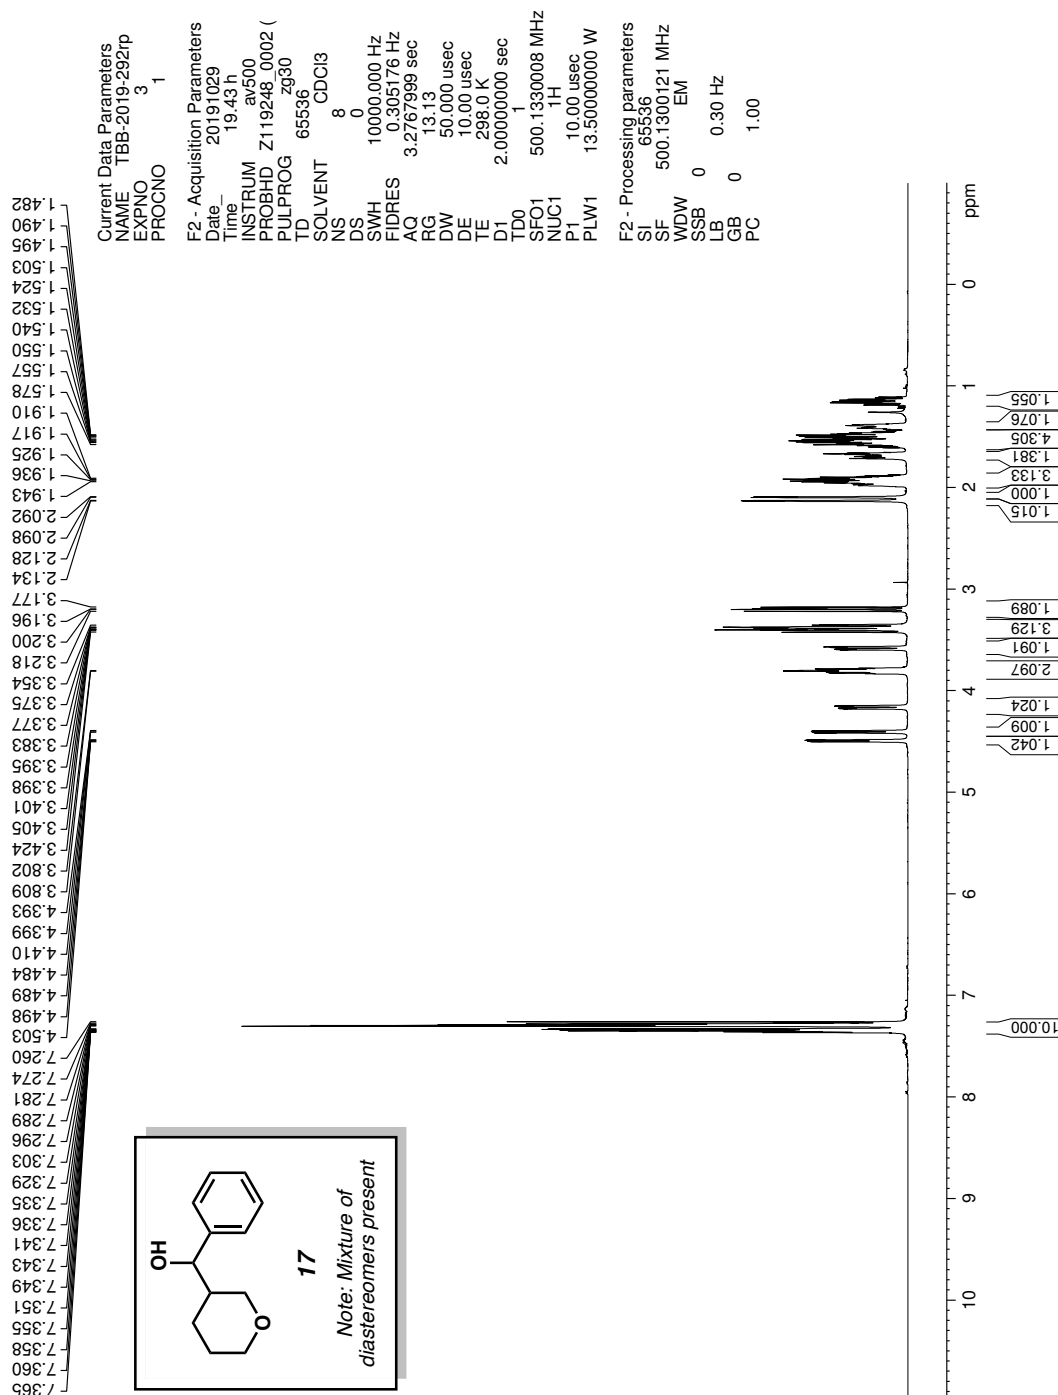

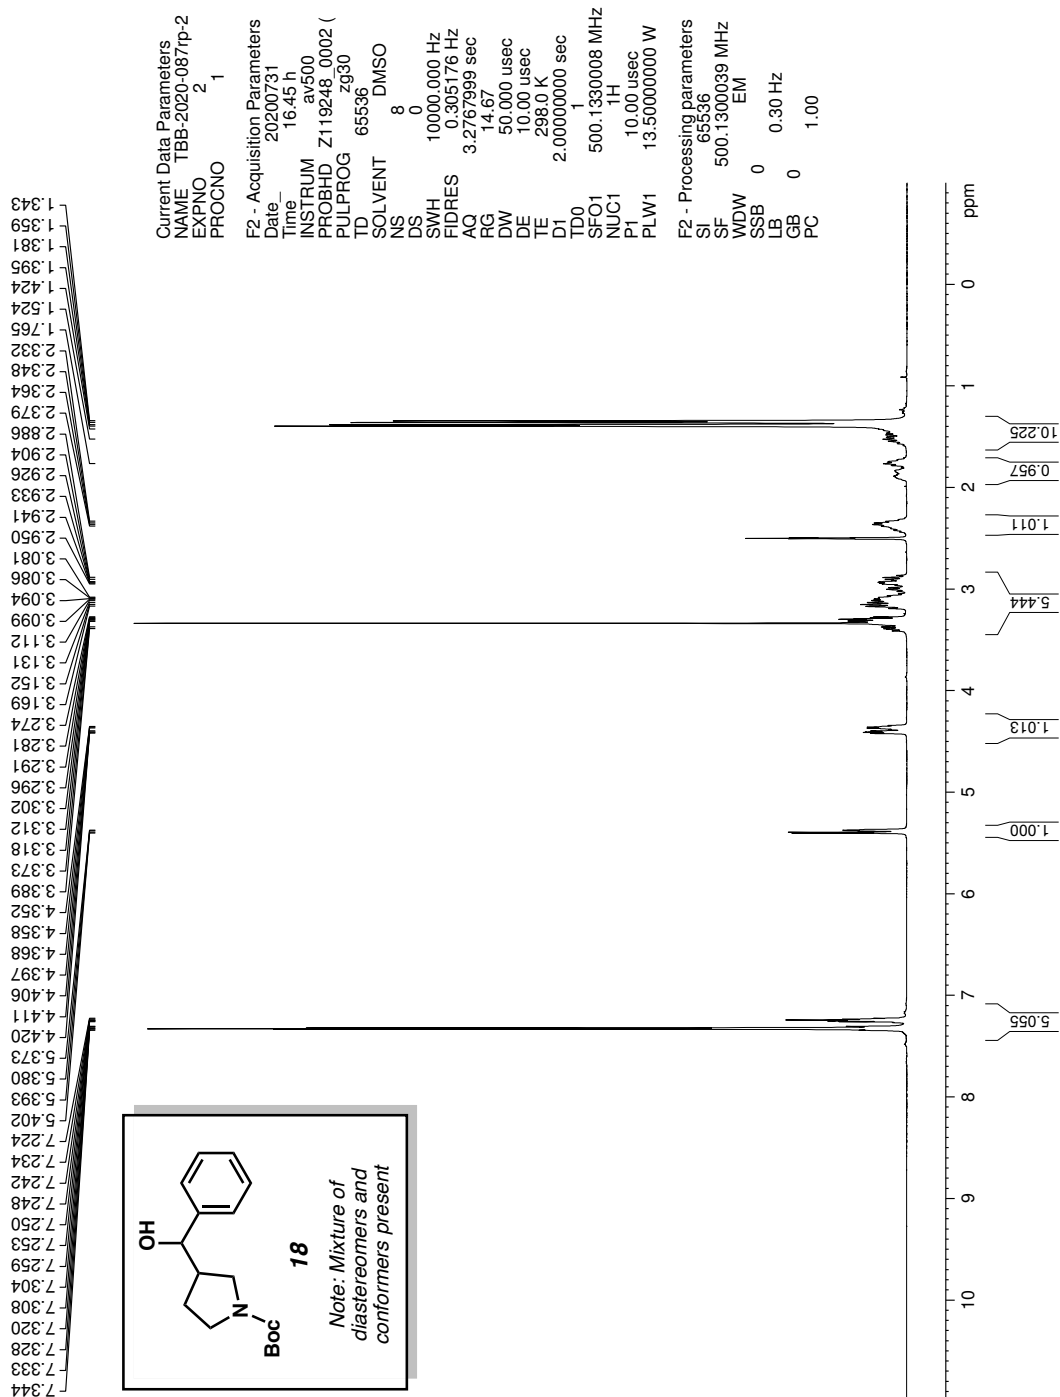

Current Data Parameters  
 NAME TBB-2019-322rp  
 EXPNO 3  
 PROCNO 1

F2 - Acquisition Parameters  
 Date\_ 20200803  
 Time 19.20 h  
 INSTRUM av500  
 PROBHD Z119248\_0002 (  
 PULPROG zg30  
 TD 65536  
 SOLVENT CDCI3  
 NS 8  
 DS 0  
 SWH 10000.000 Hz  
 FIDRES 0.305176 Hz  
 AQ 3.2767999 sec  
 RG 12.14  
 DW 50.000 usec  
 DE 10.00 usec  
 TE 298.0 K  
 D1 2.00000000 sec  
 TD0 1  
 SFO1 500.1330008 MHz  
 NUC1 1H  
 P1 10.00 usec  
 PLW1 13.50000000 W

F2 - Processing parameters  
 SI 65536  
 SF 500.1300121 MHz  
 WDW EM  
 SSB 0  
 LB 0.30 Hz  
 GB 0  
 PC 1.00

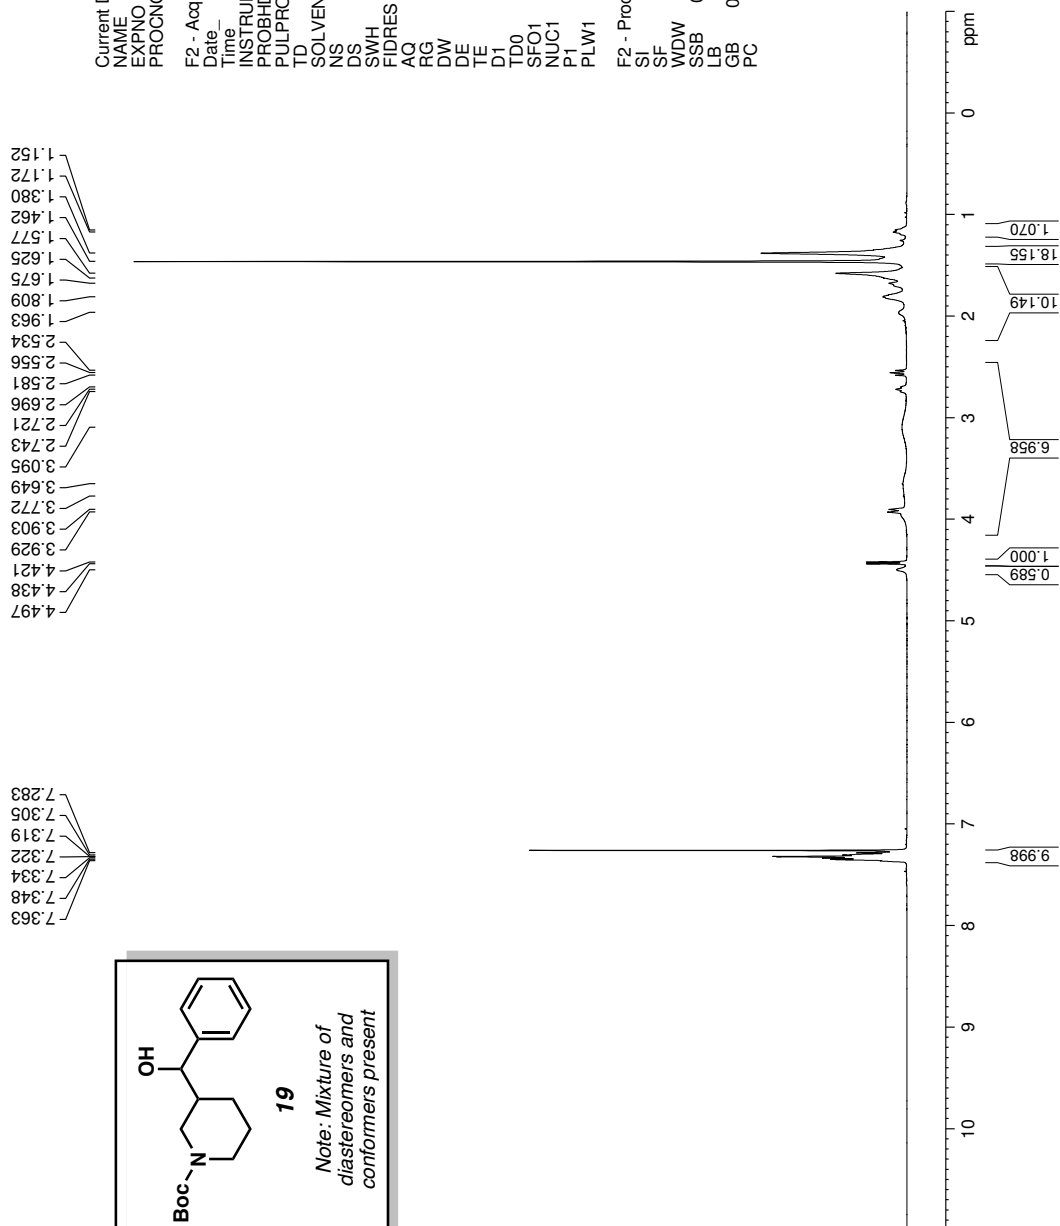



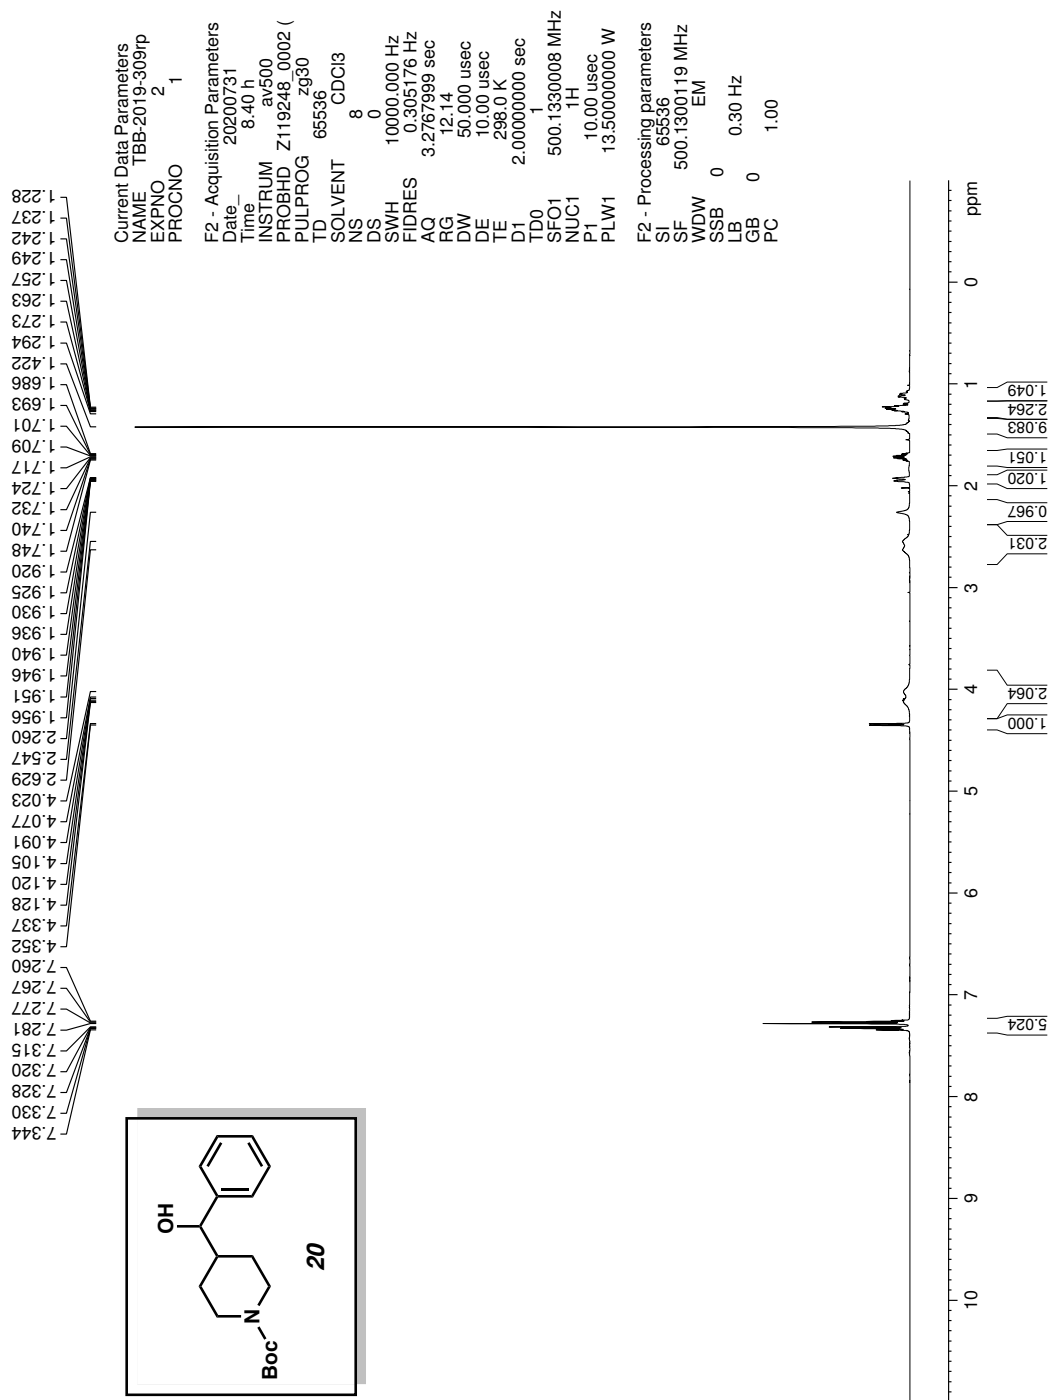

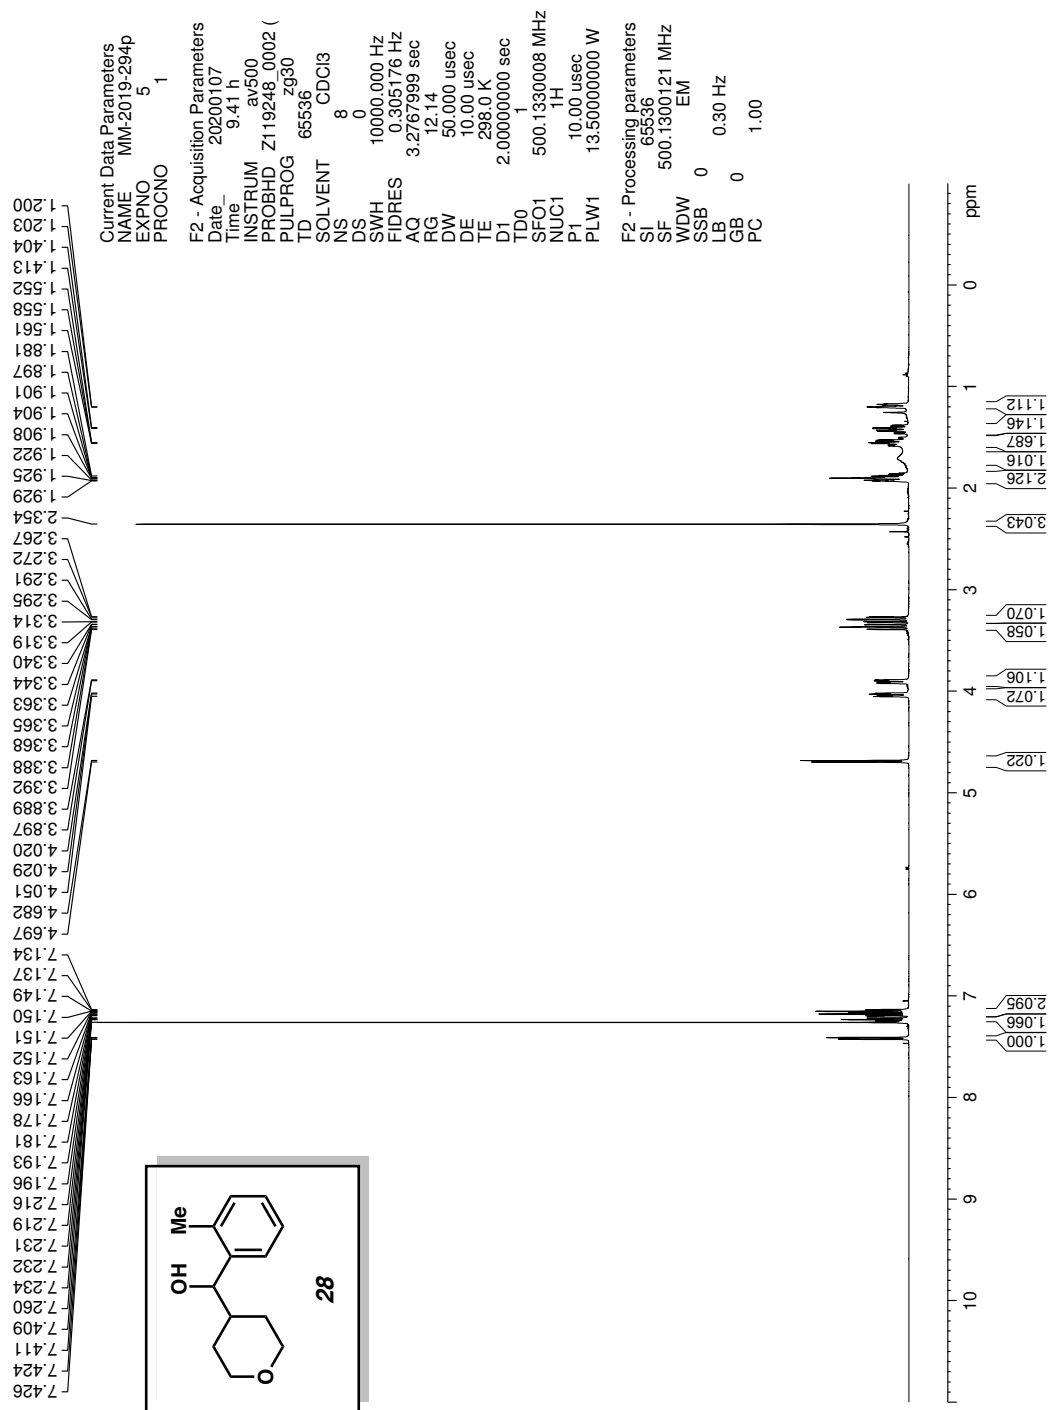

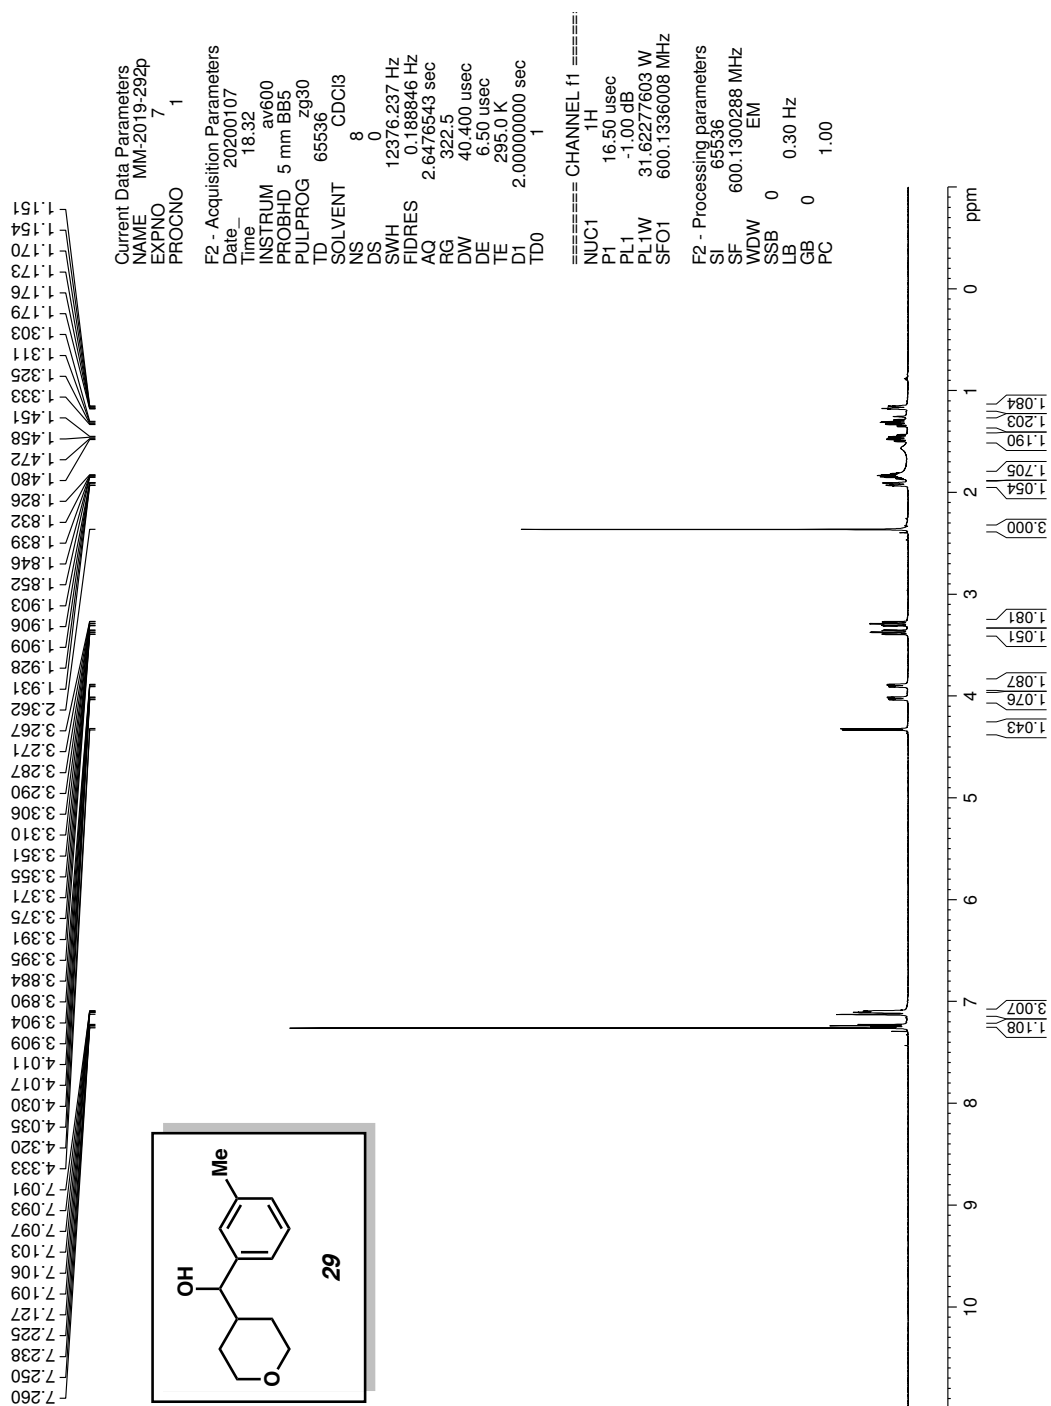

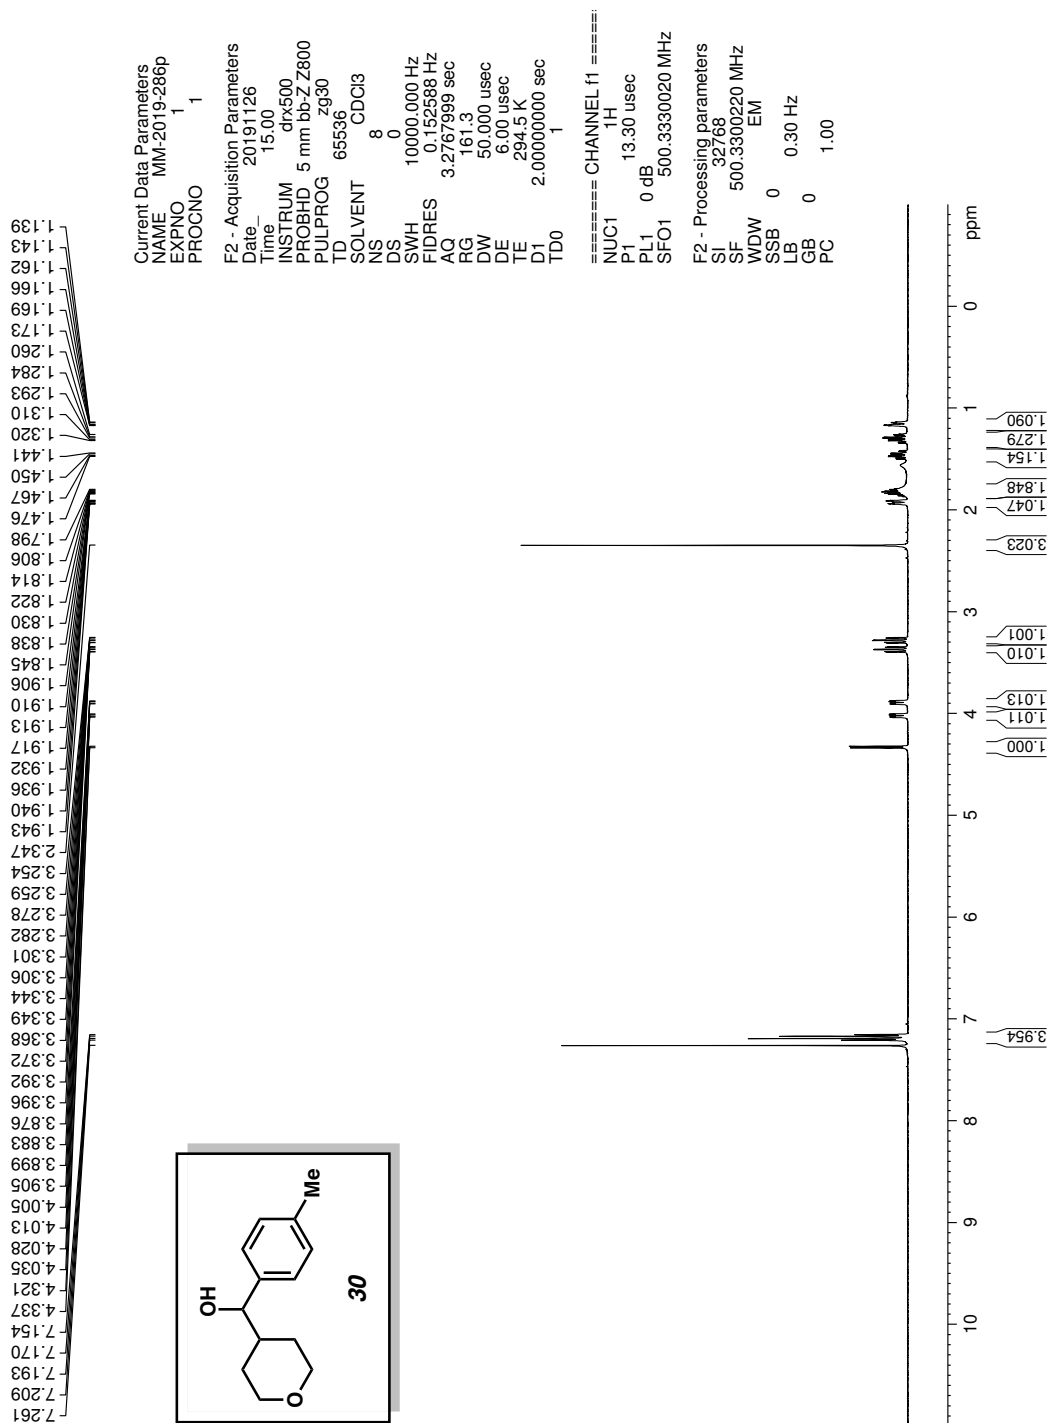

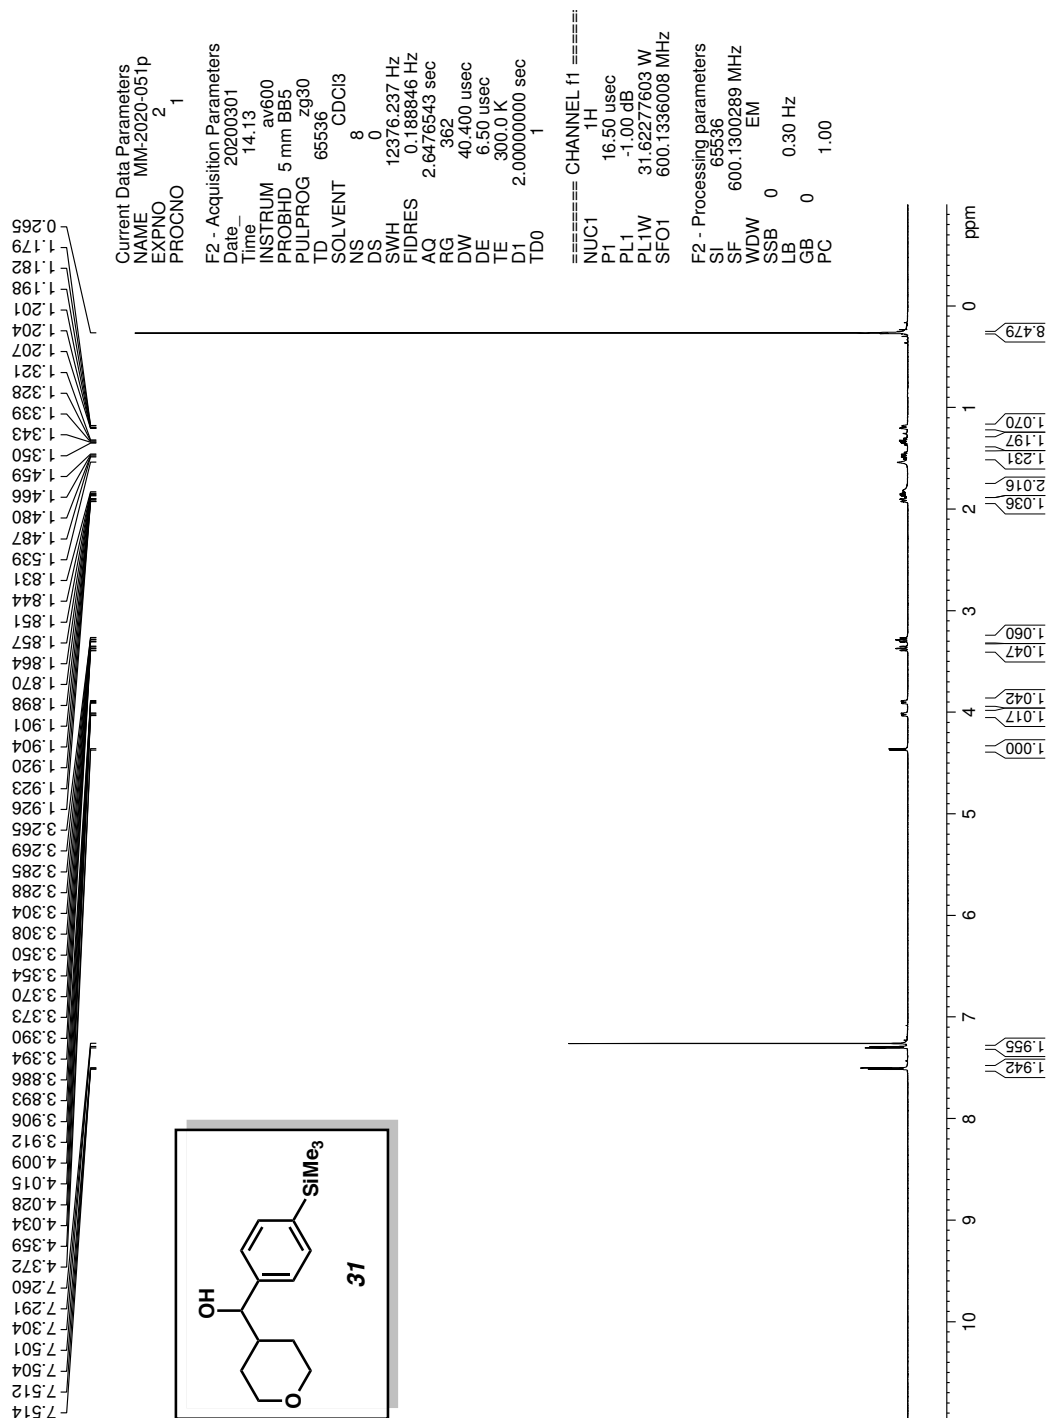

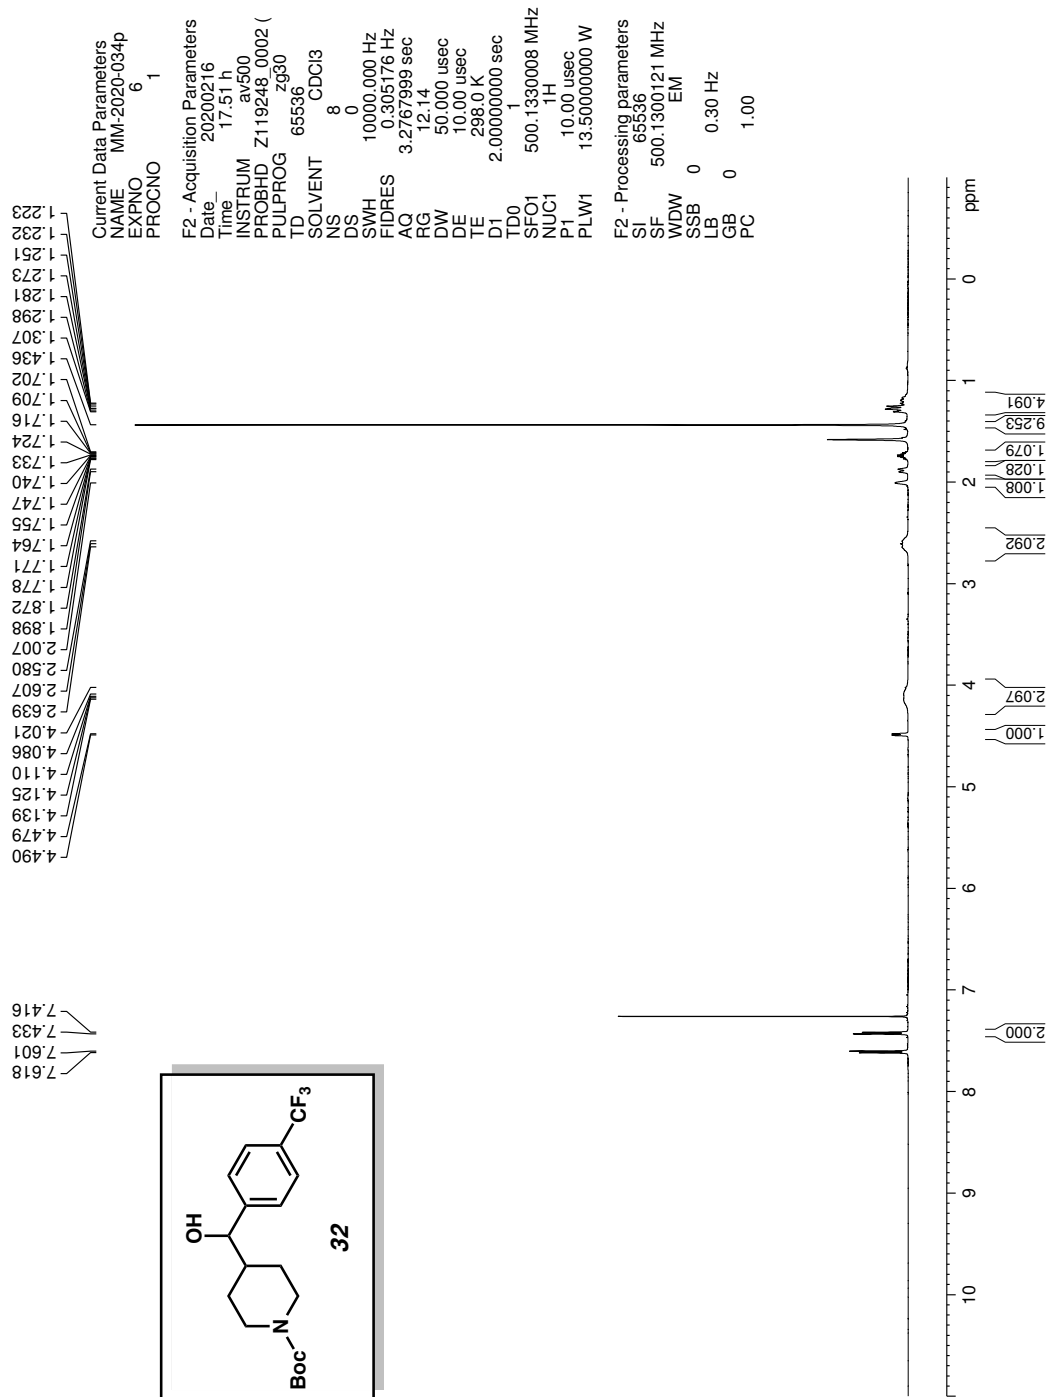

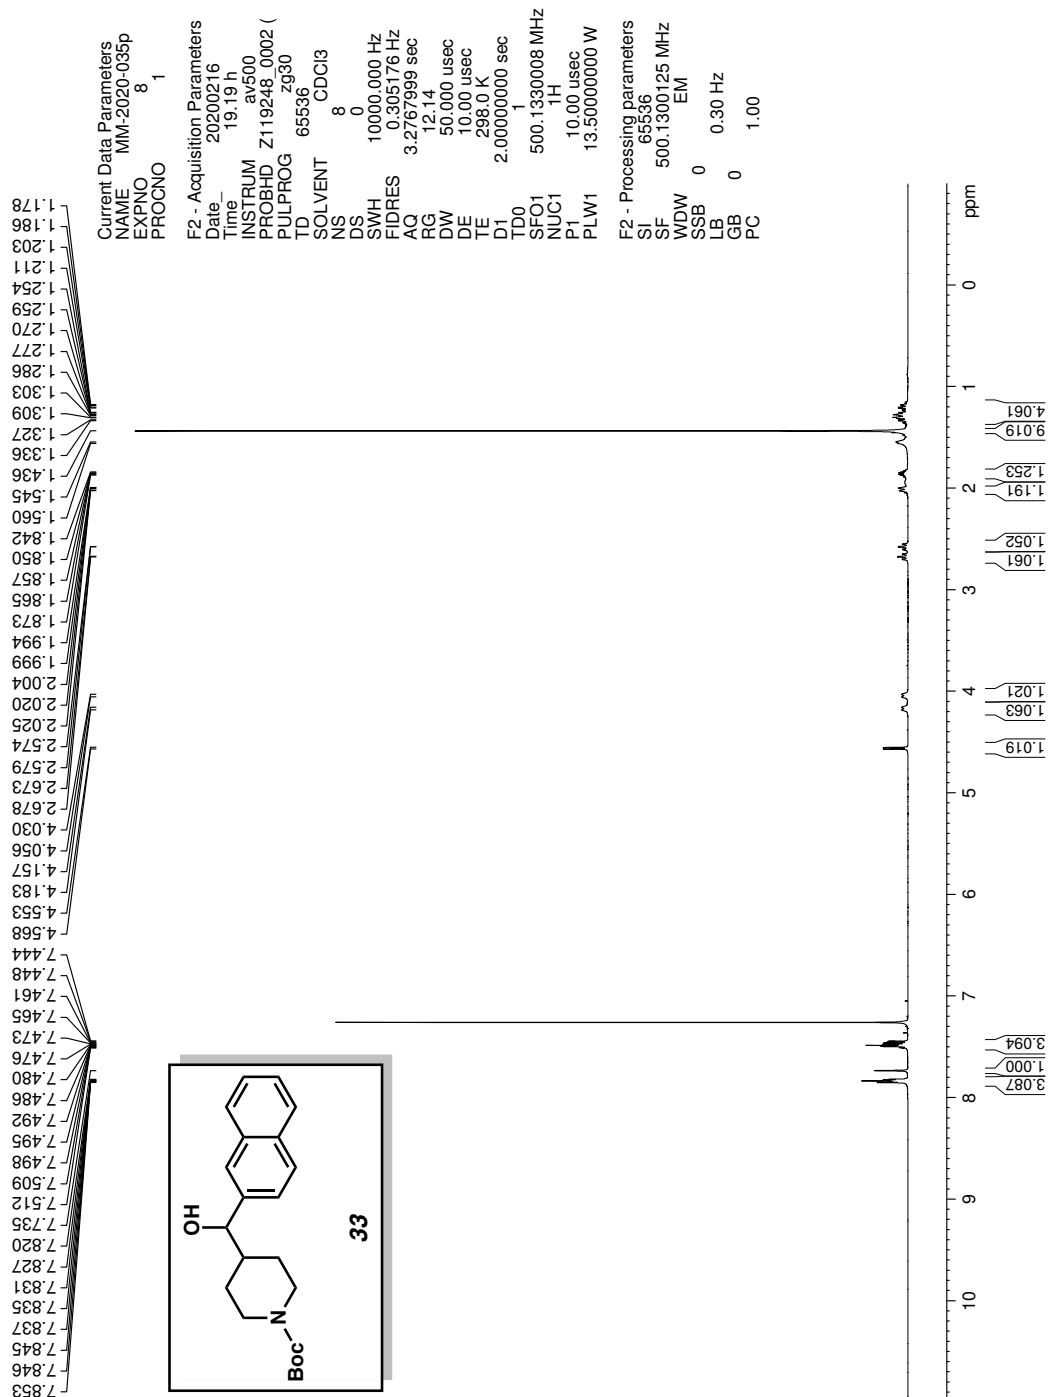

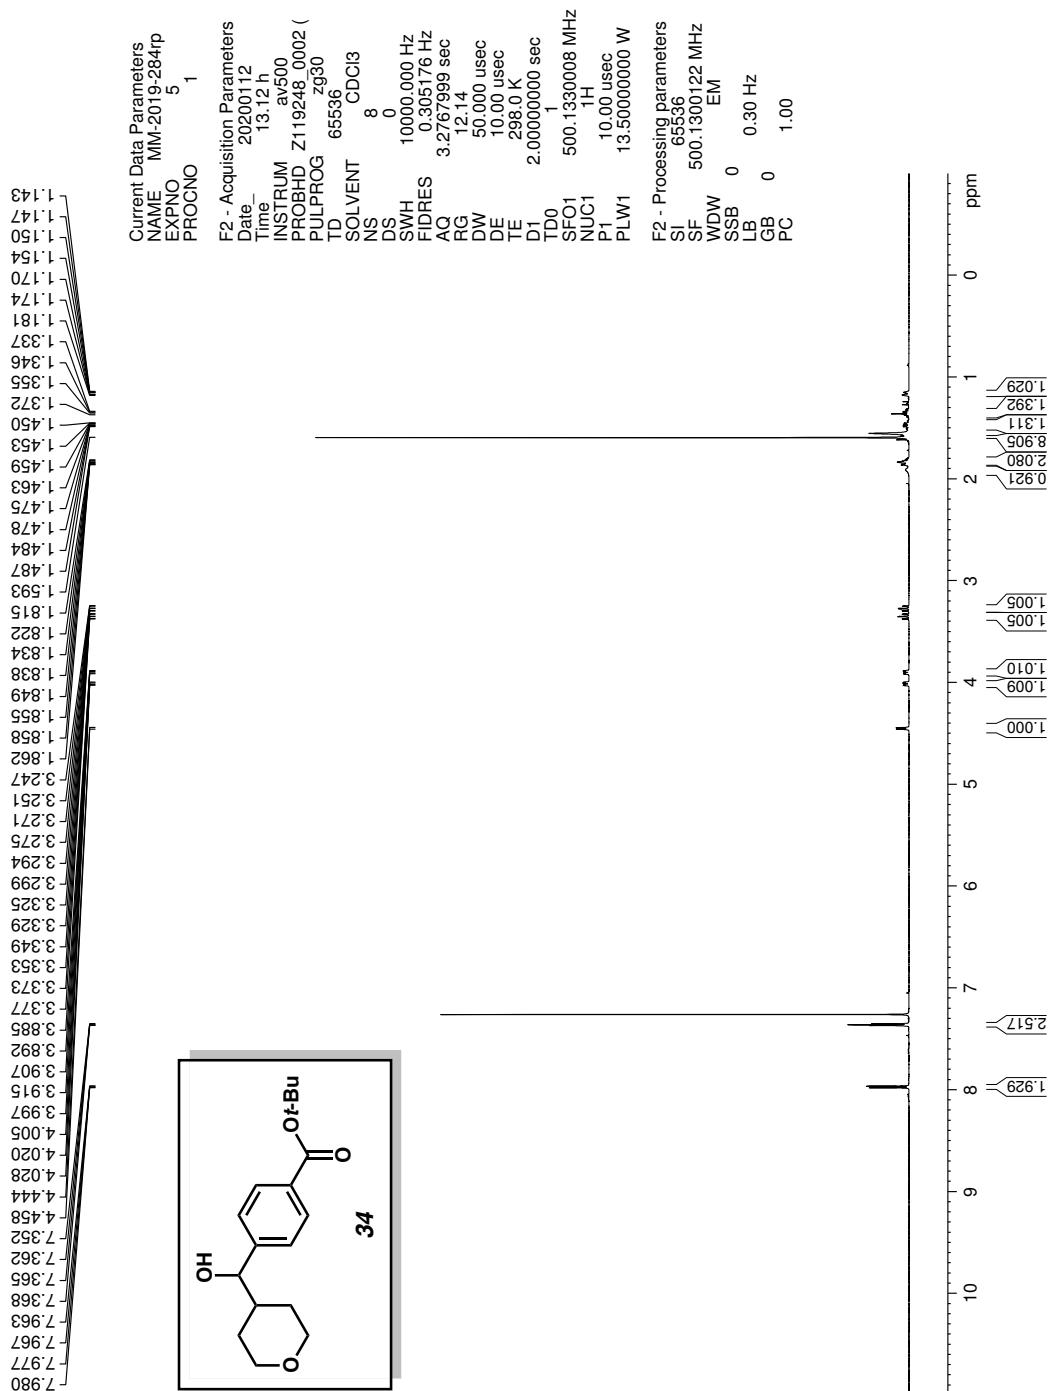



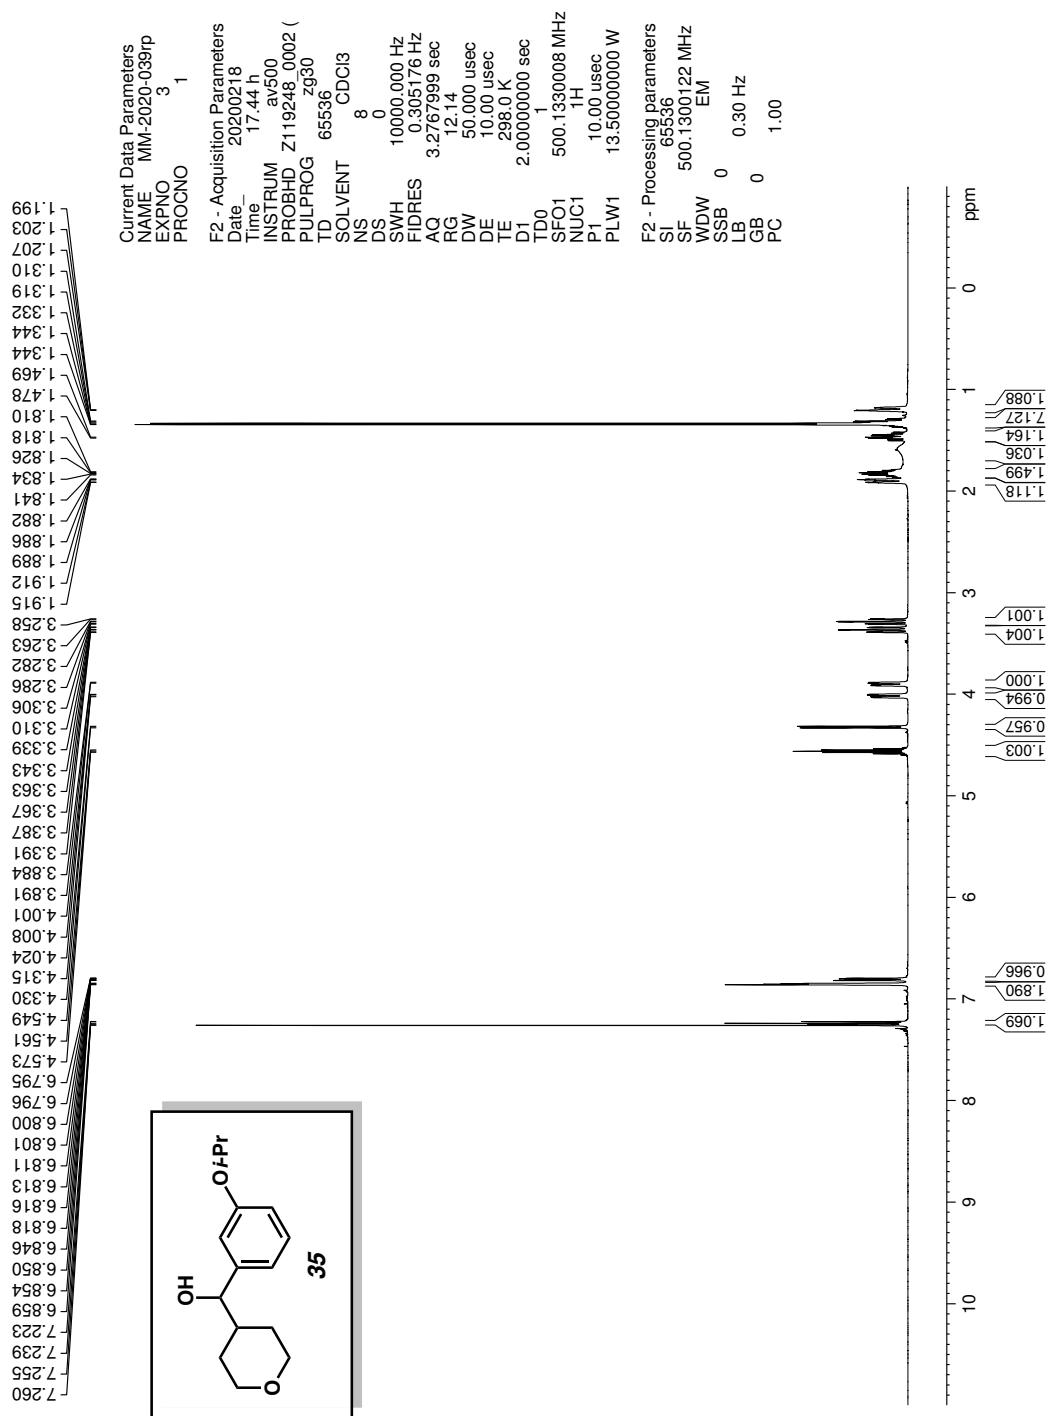

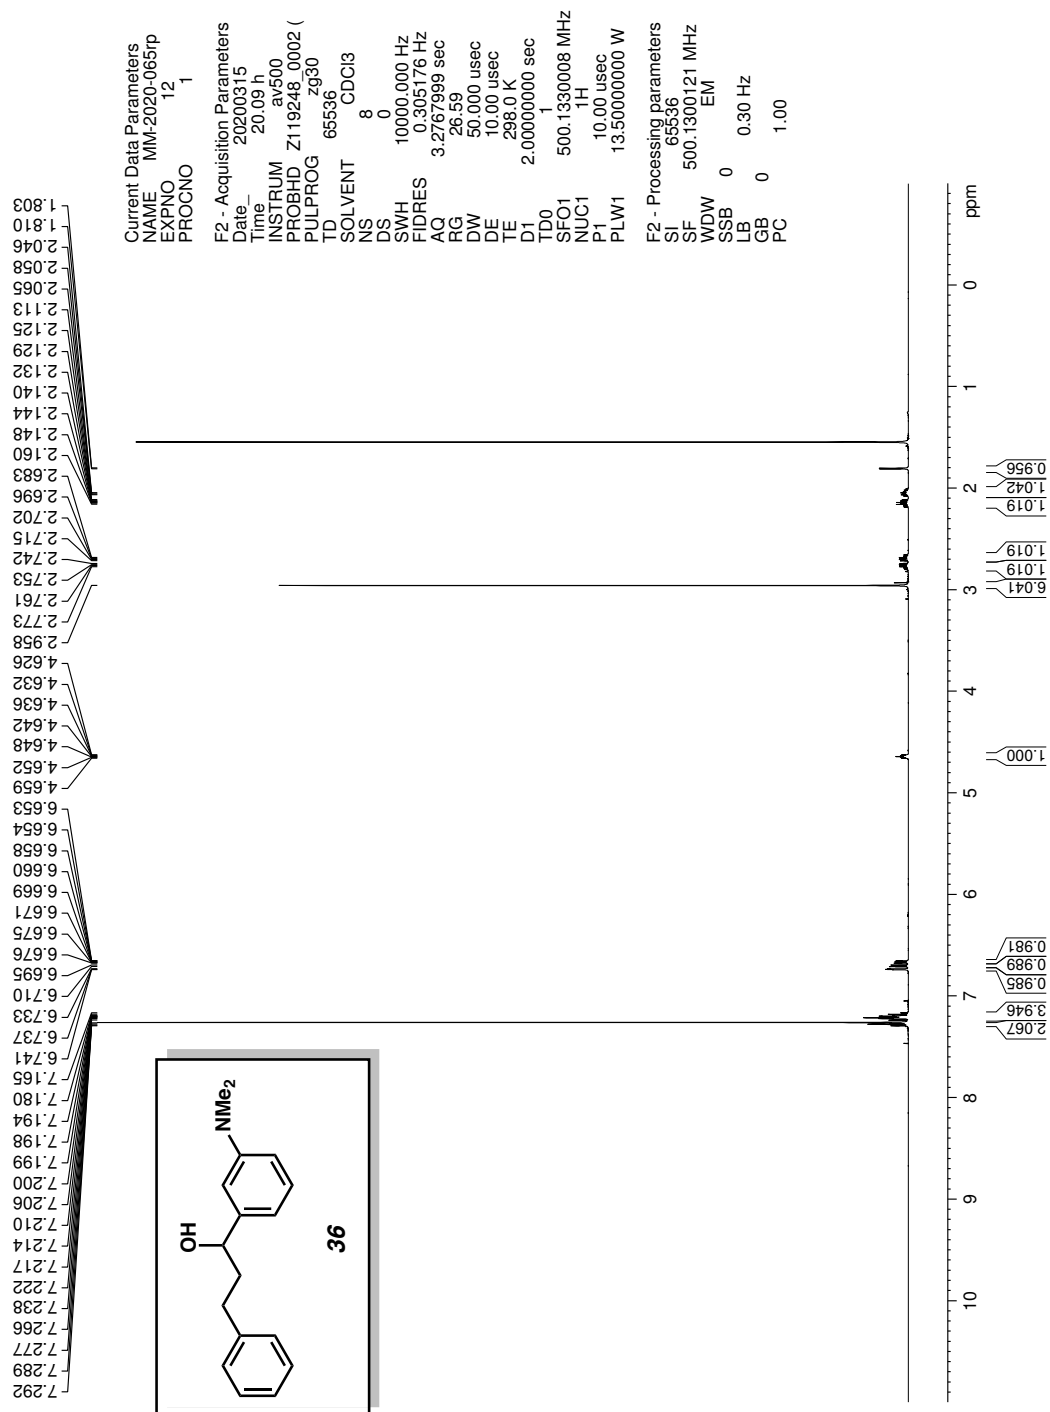

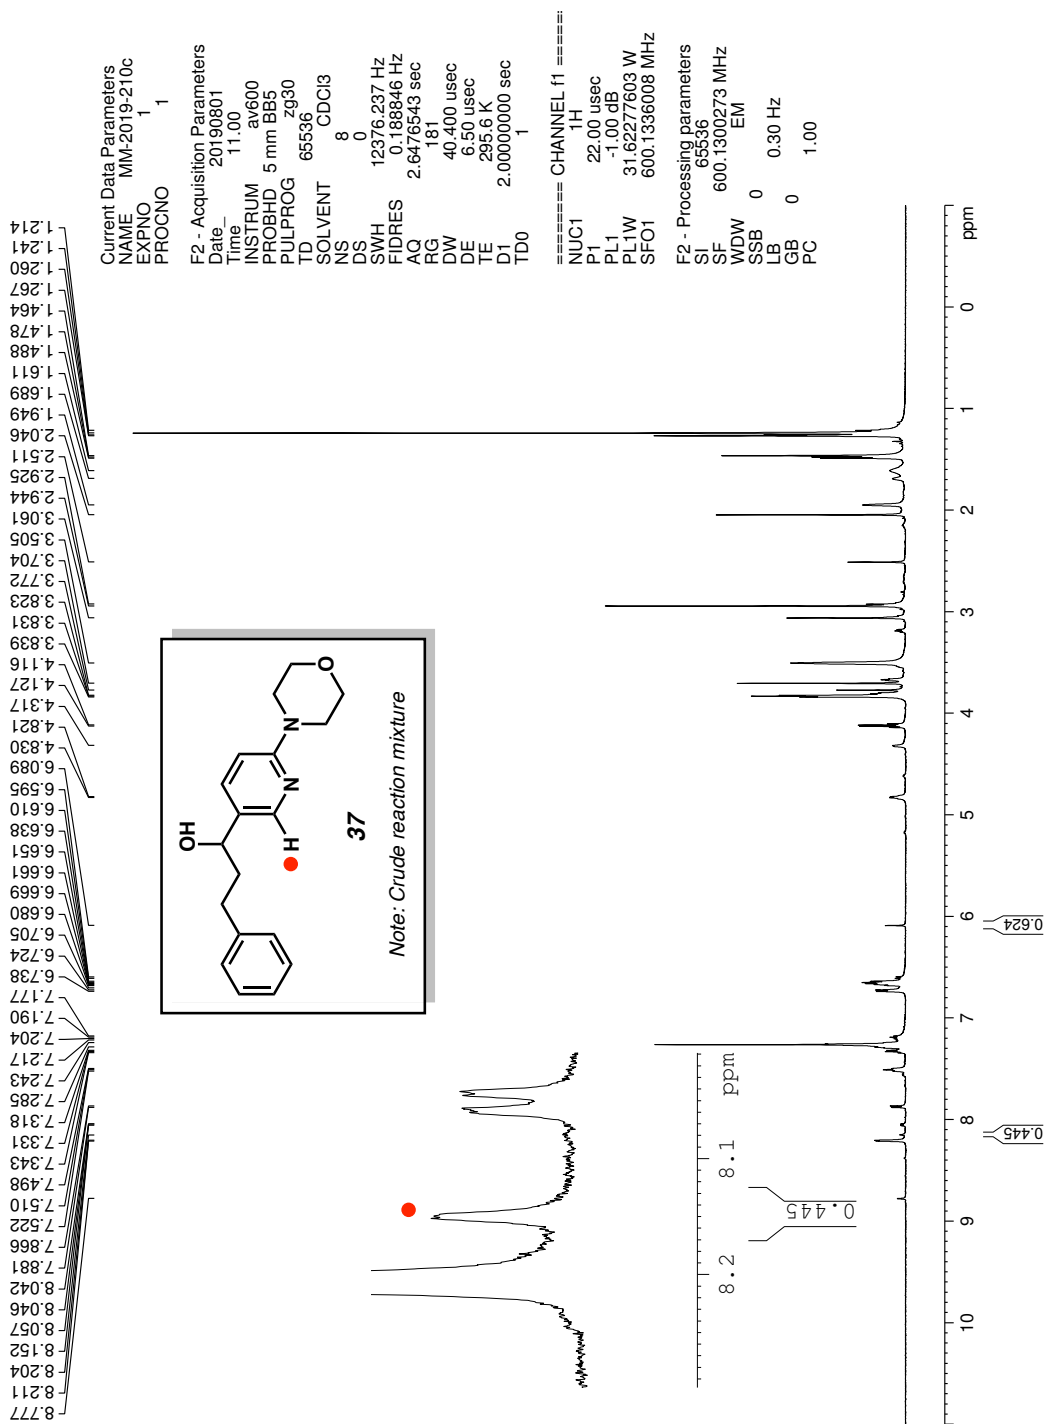

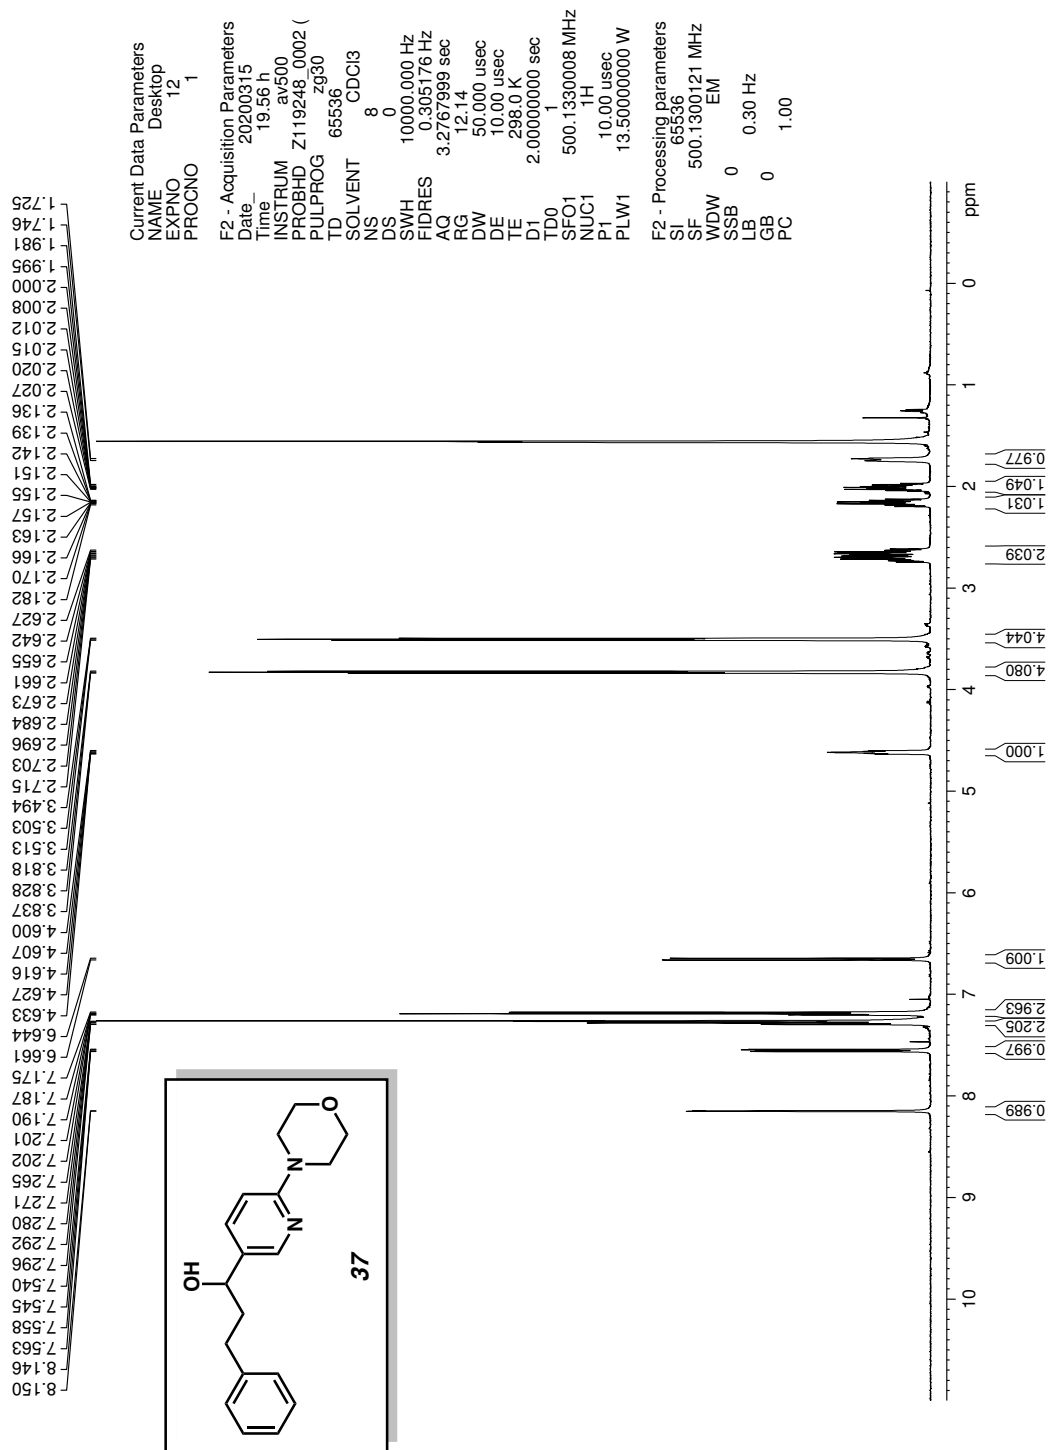

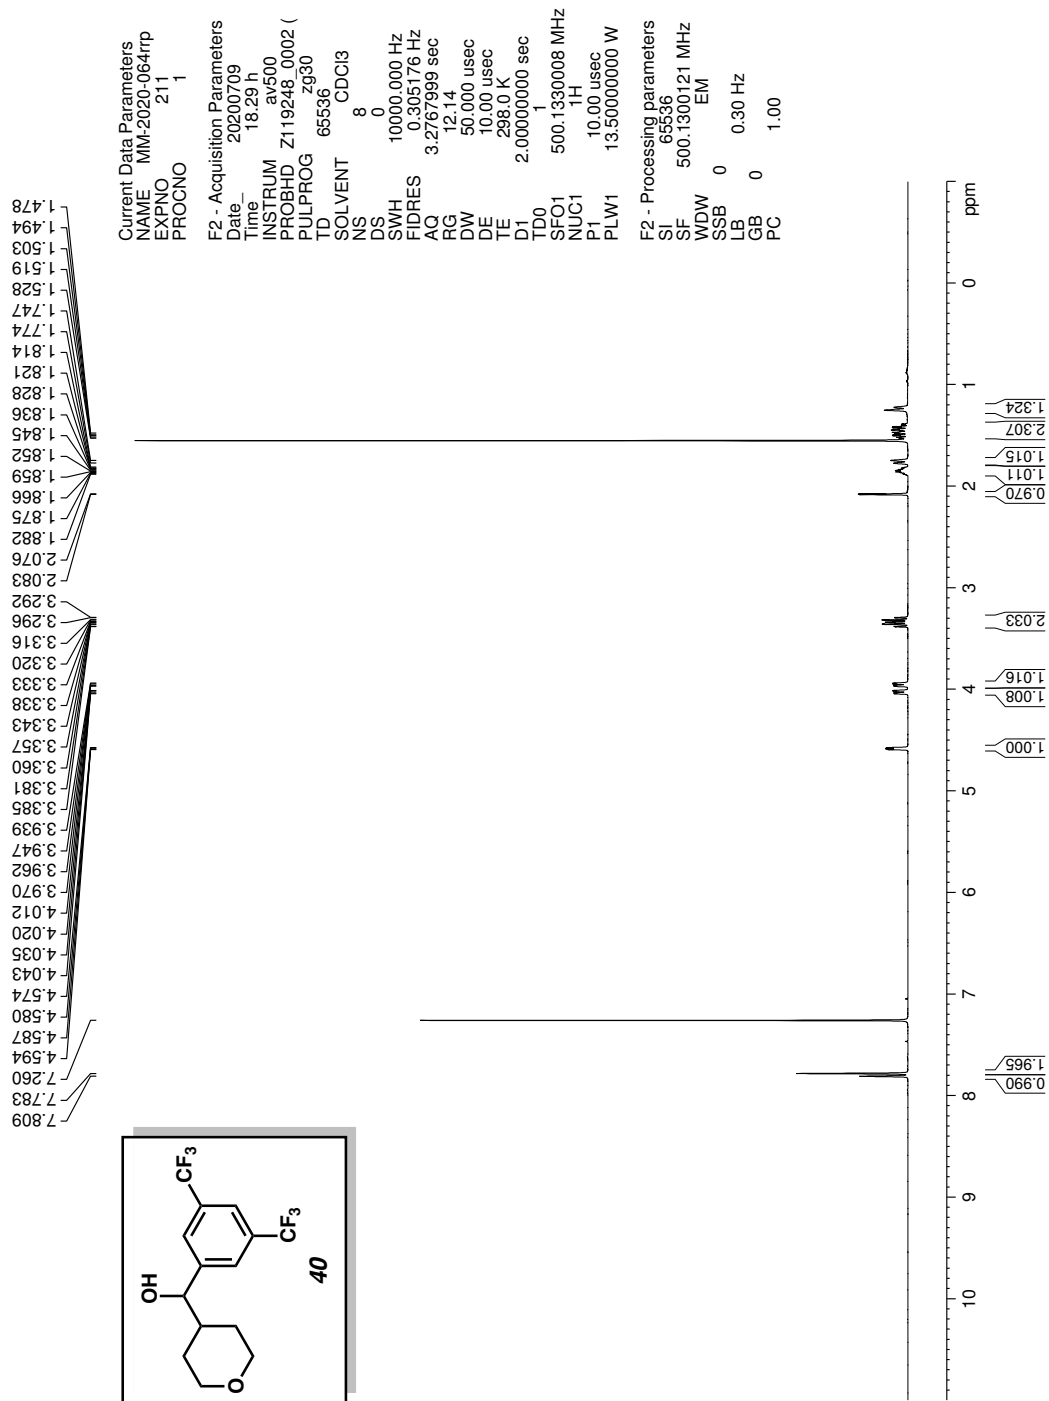

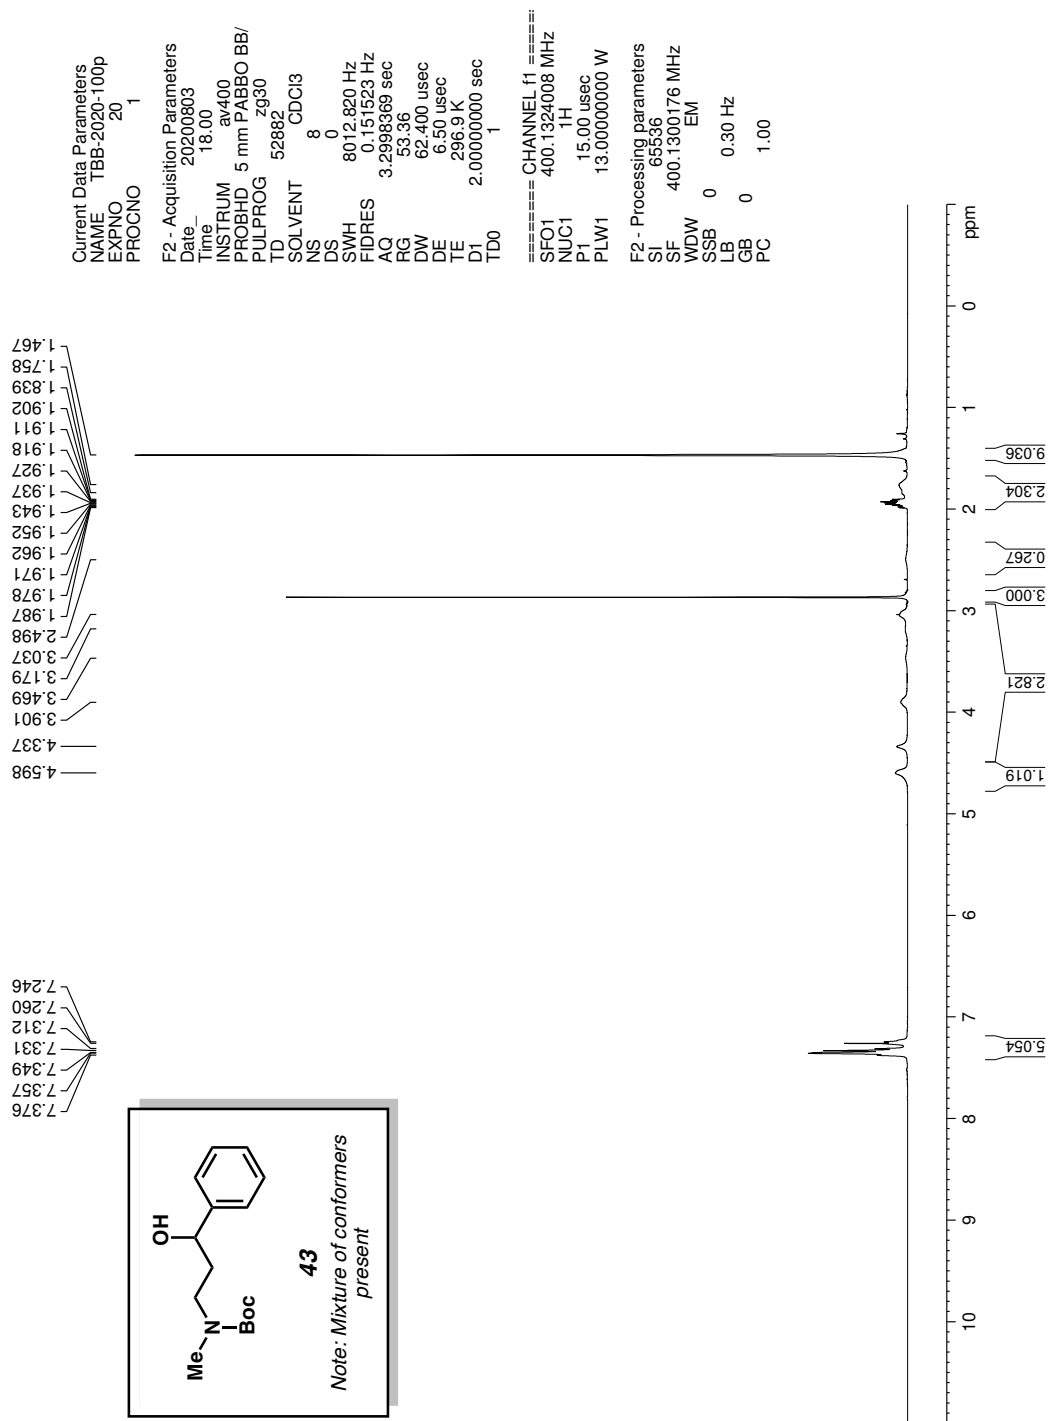

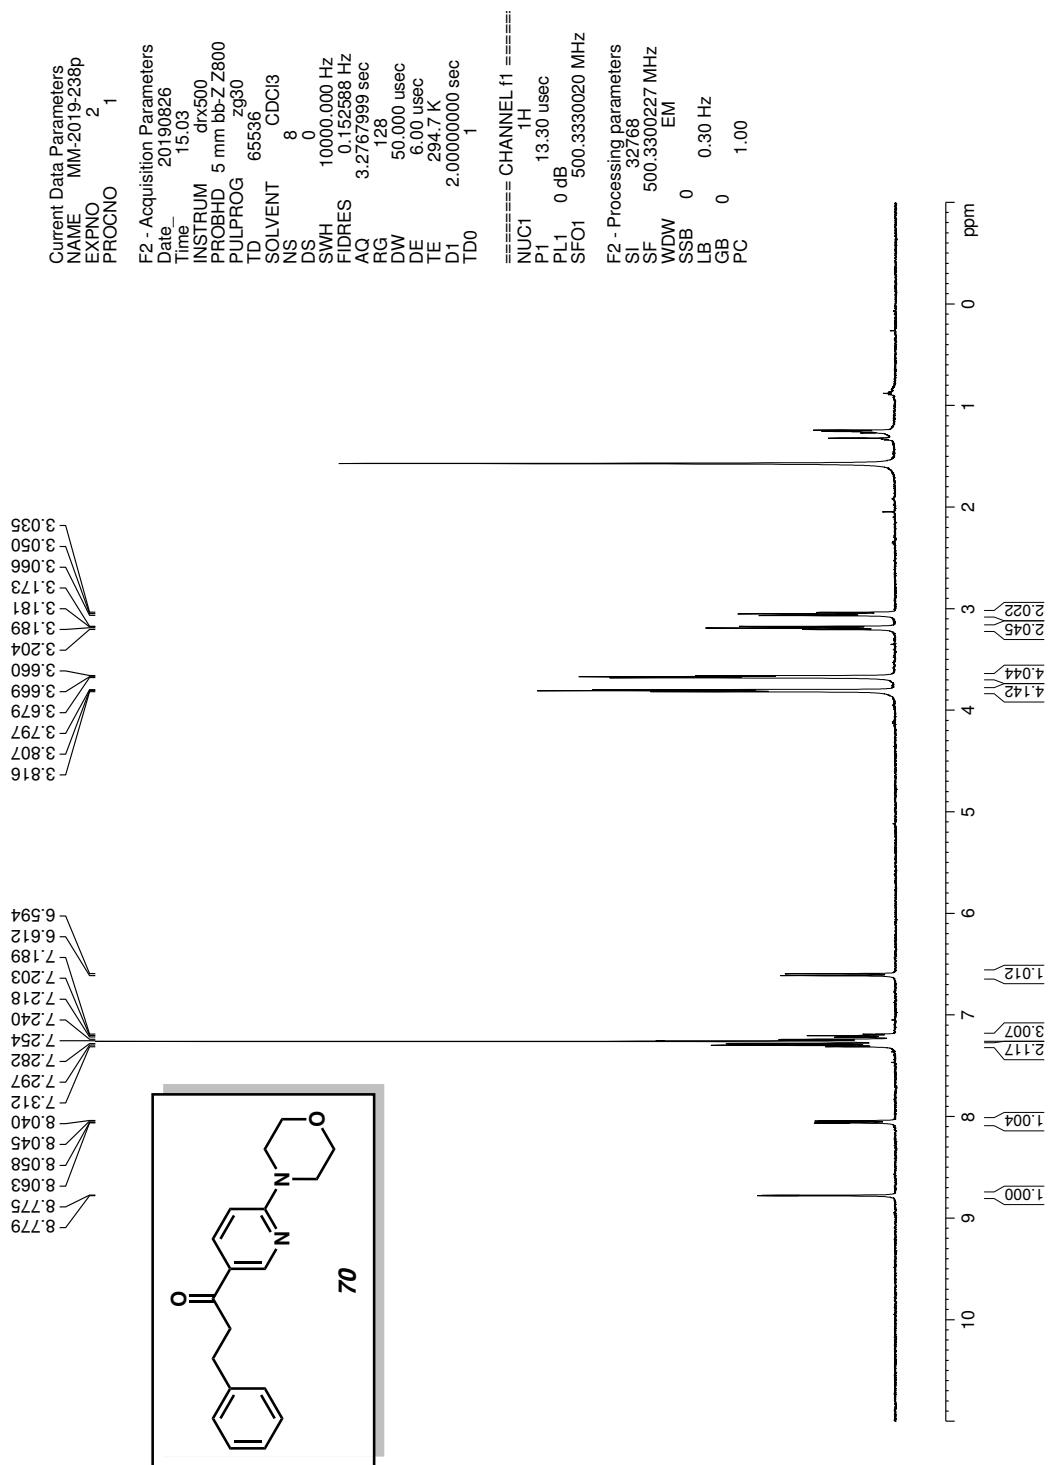

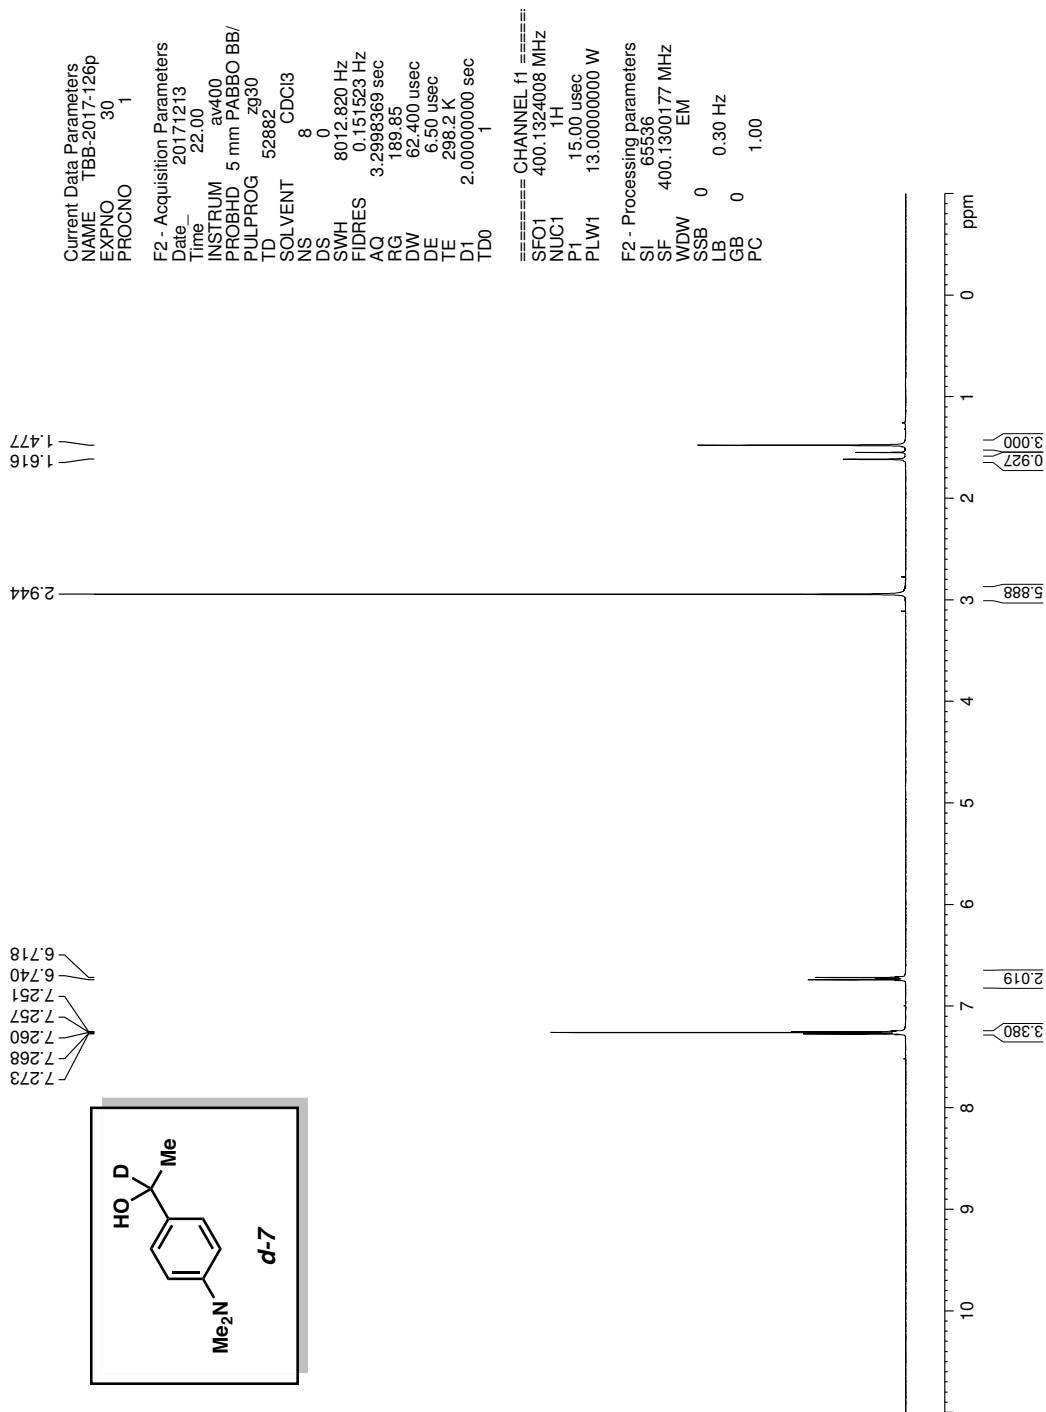



# $^{13}\text{C}$ NMR Spectra

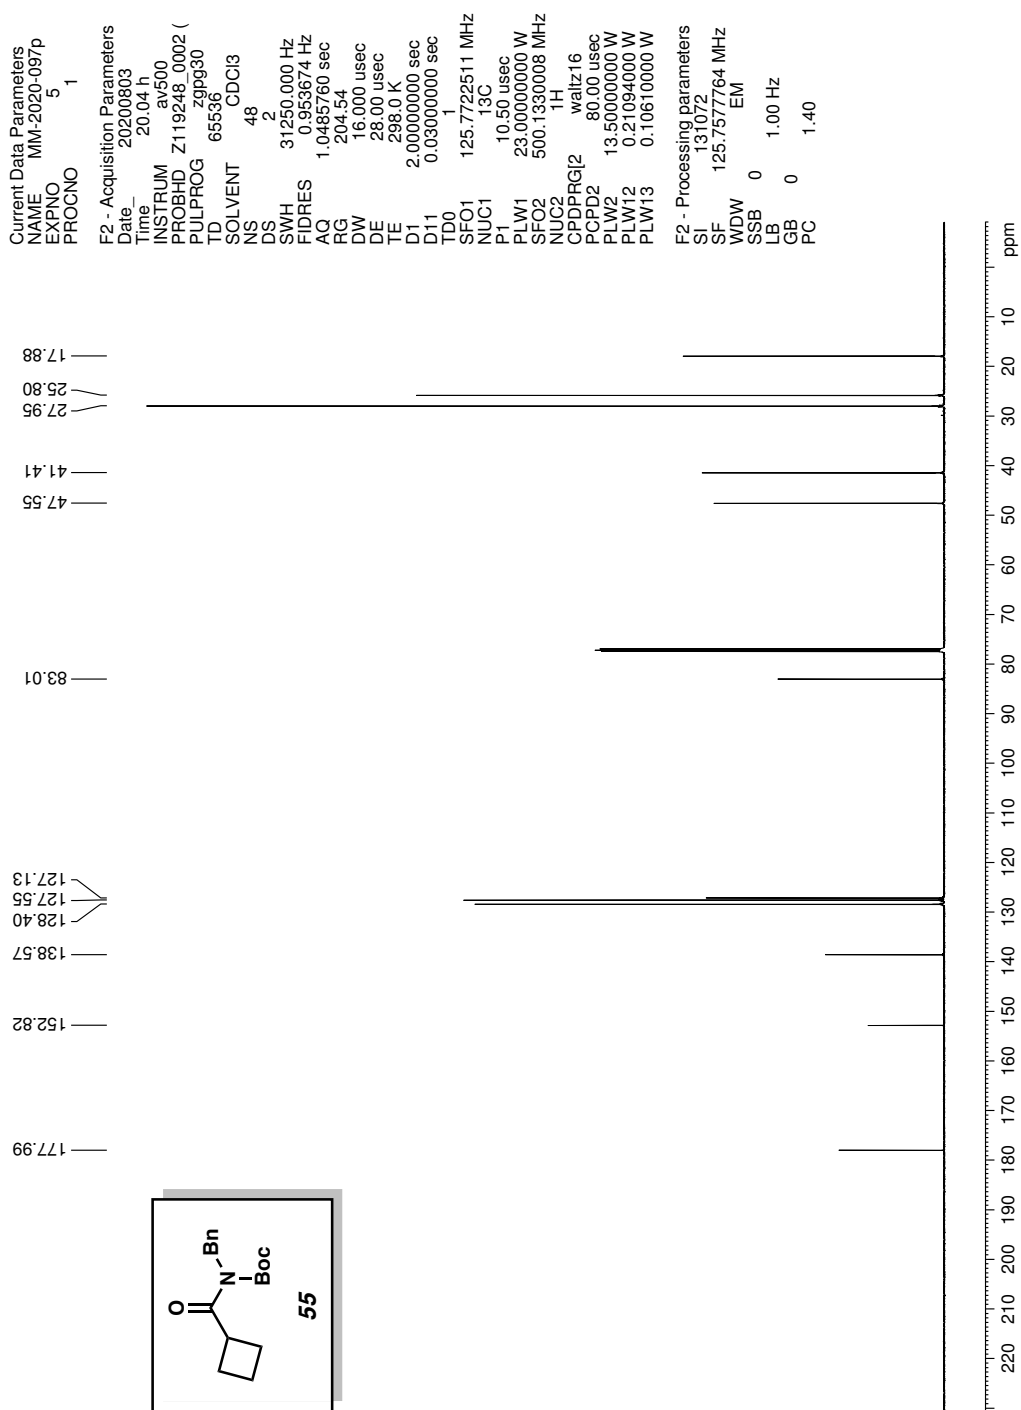

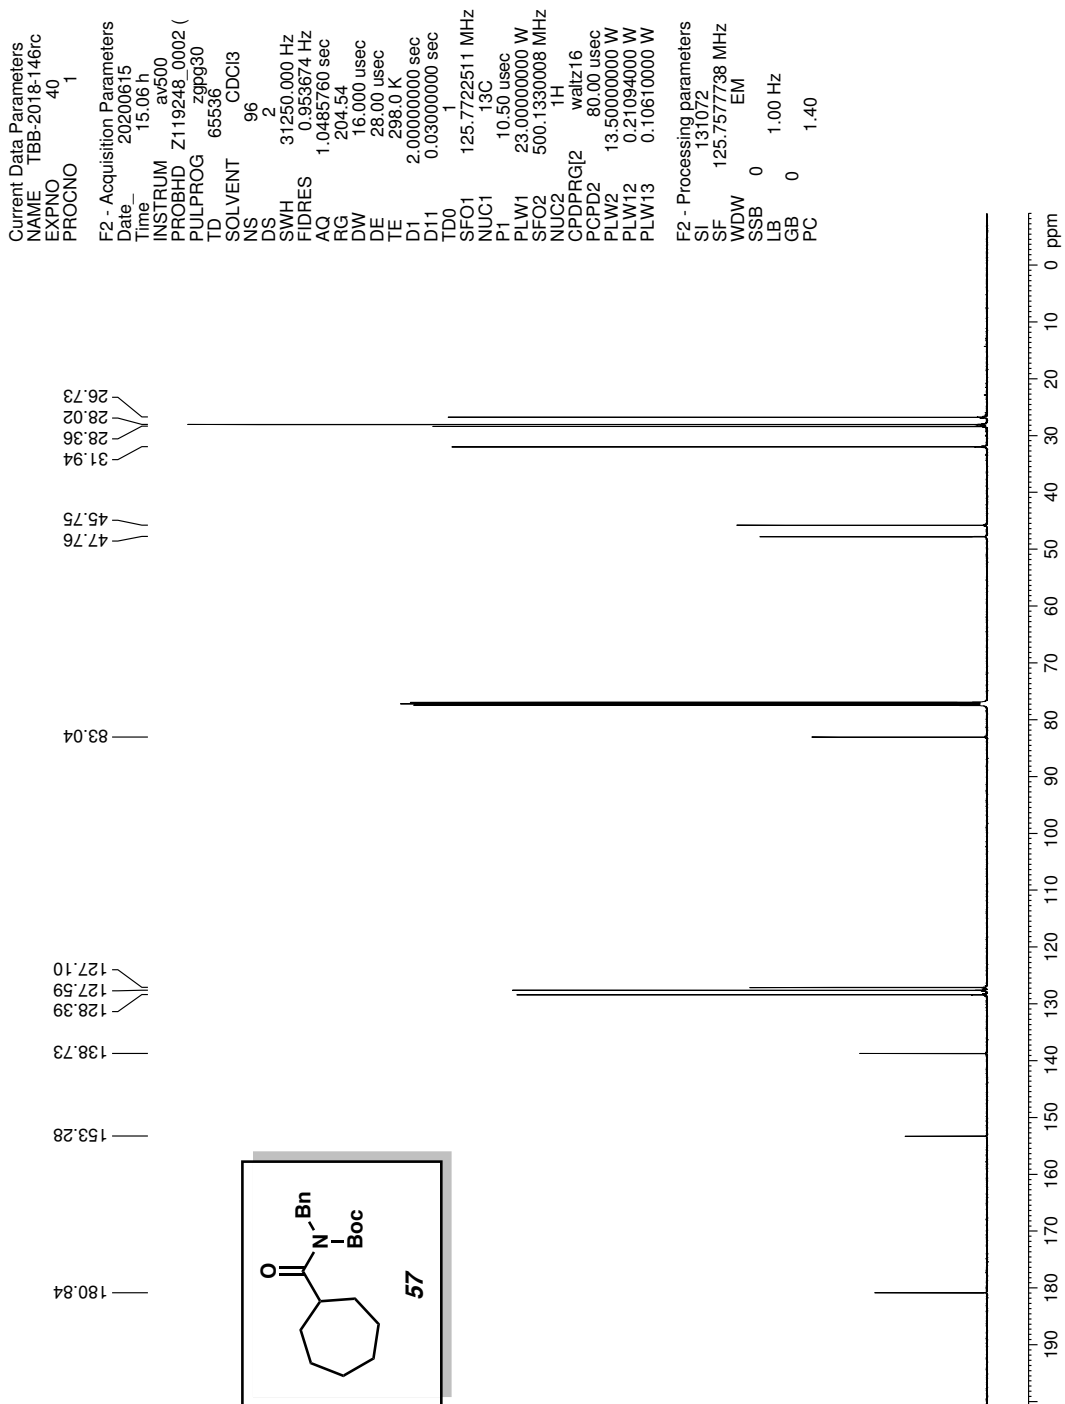

Current Data Parameters  
 NAME 1BB-2020-075p  
 EXPNO 30  
 PROCNO 1

F2 - Acquisition Parameters  
 Date\_ 20200731  
 Time\_ 8.36 h  
 INSTRUM av500  
 PROBHD Z119248\_0002 (zpgpg30)  
 PULPROG zgpg30  
 TD 65536  
 SOLVENT CDCl3  
 NS 240  
 DS 2  
 SWH 31250.000 Hz  
 FIDRES 0.953674 Hz  
 AQ 1.0485760 sec  
 RG 204.54  
 DW 16.000 usec  
 DE 28.00 usec  
 TE 298.0 K  
 D1 2.0000000 sec  
 D11 0.0300000 sec  
 TD0 1  
 SFO1 125.7722511 MHz  
 NUC1 13C  
 P1 10.50 usec  
 PLW1 23.0000000 W  
 SFO2 500.1330008 MHz  
 NUC2 1H  
 CPDPRG2 waltz16  
 PCPD2 80.00 usec  
 PLW2 13.5000000 W  
 PLW12 0.21094000 W  
 PLW13 0.10610000 W

F2 - Processing parameters  
 SI 131072  
 SF 125.757732 MHz  
 EM  
 WDW 0  
 SSB 0 1.00 Hz  
 LB 0  
 GB 0  
 PC 1.40

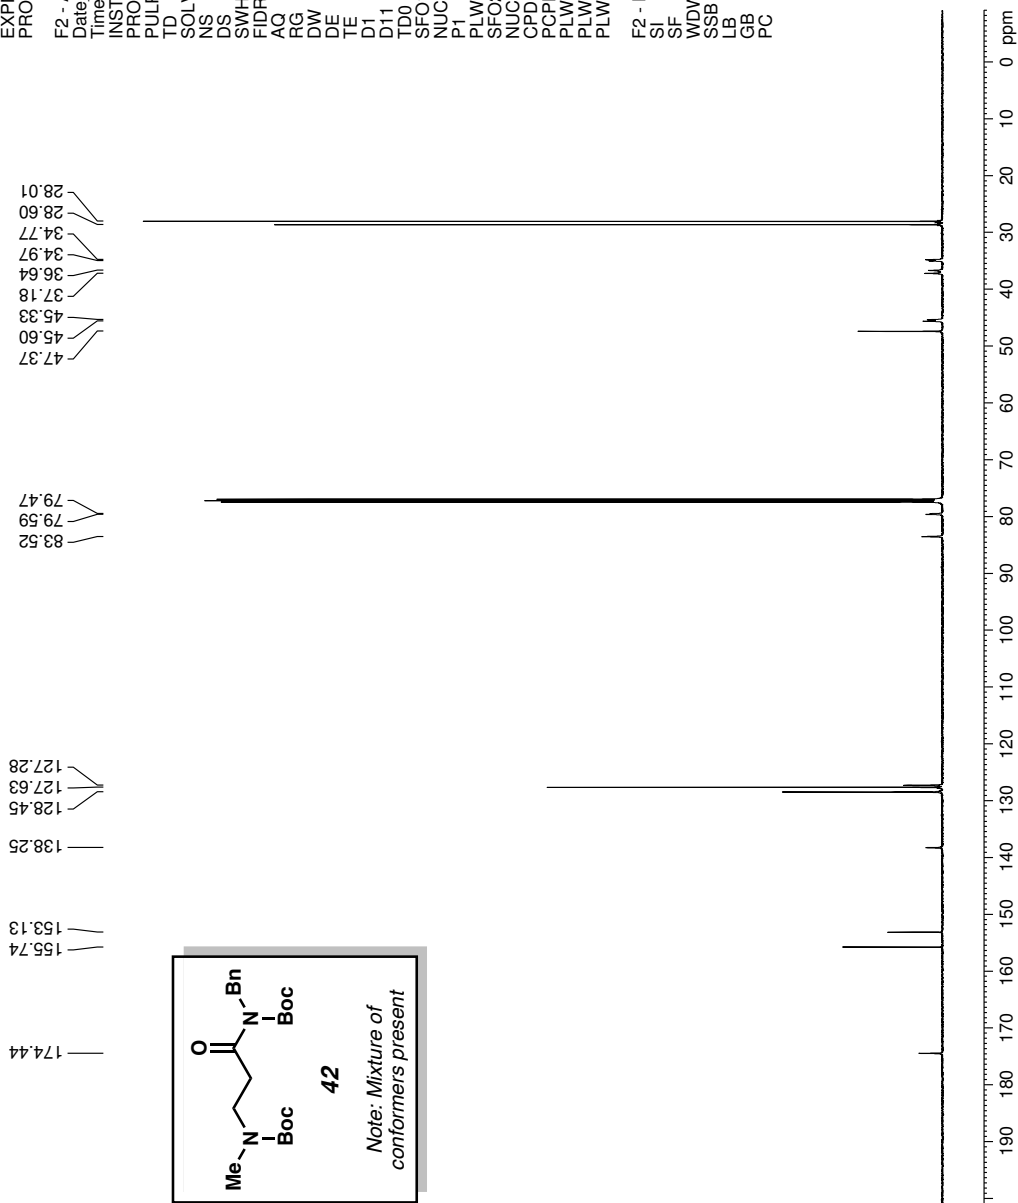

Current Data Parameters  
 NAME TBB-2020-021p  
 EXPNO 211  
 PROCNO 1

F2 - Acquisition Parameters  
 Date\_ 20200715  
 Time\_ 18.09 h  
 INSTRUM av500  
 PROBHD Z119248\_0002 (zpgp30)  
 PULPROG zgpg30  
 TD 65536  
 SOLVENT CDC13  
 NS 208  
 DS 2  
 SWH 31250.000 Hz  
 FIDRES 0.963674 Hz  
 AQ 1.0485760 sec  
 RG 204.54  
 DW 16.000 usec  
 DE 28.000 usec  
 TE 298.0 K  
 D1 2.0000000 sec  
 D11 0.0300000 sec  
 TD0 1  
 SFO1 125.7722511 MHz  
 NUC1 13C  
 P1 10.50 usec  
 PLW1 23.0000000 W  
 SFO2 500.1330008 MHz  
 NUC2 1H  
 CPDPRG2 waltz16  
 PCPD2 80.00 usec  
 PLW2 13.5000000 W  
 PLW12 0.21094000 W  
 PLW13 0.10610000 W

F2 - Processing parameters  
 SI 131072  
 SF 125.7577719 MHz  
 WDW EM  
 SSB 0  
 LB 1.00 Hz  
 GB 0  
 PC 1.40

26.69  
 26.86  
 28.50  
 28.61  
 29.38  
 31.19

46.44

79.35

126.78  
 127.47  
 128.34

143.99

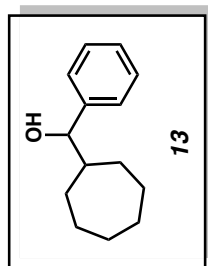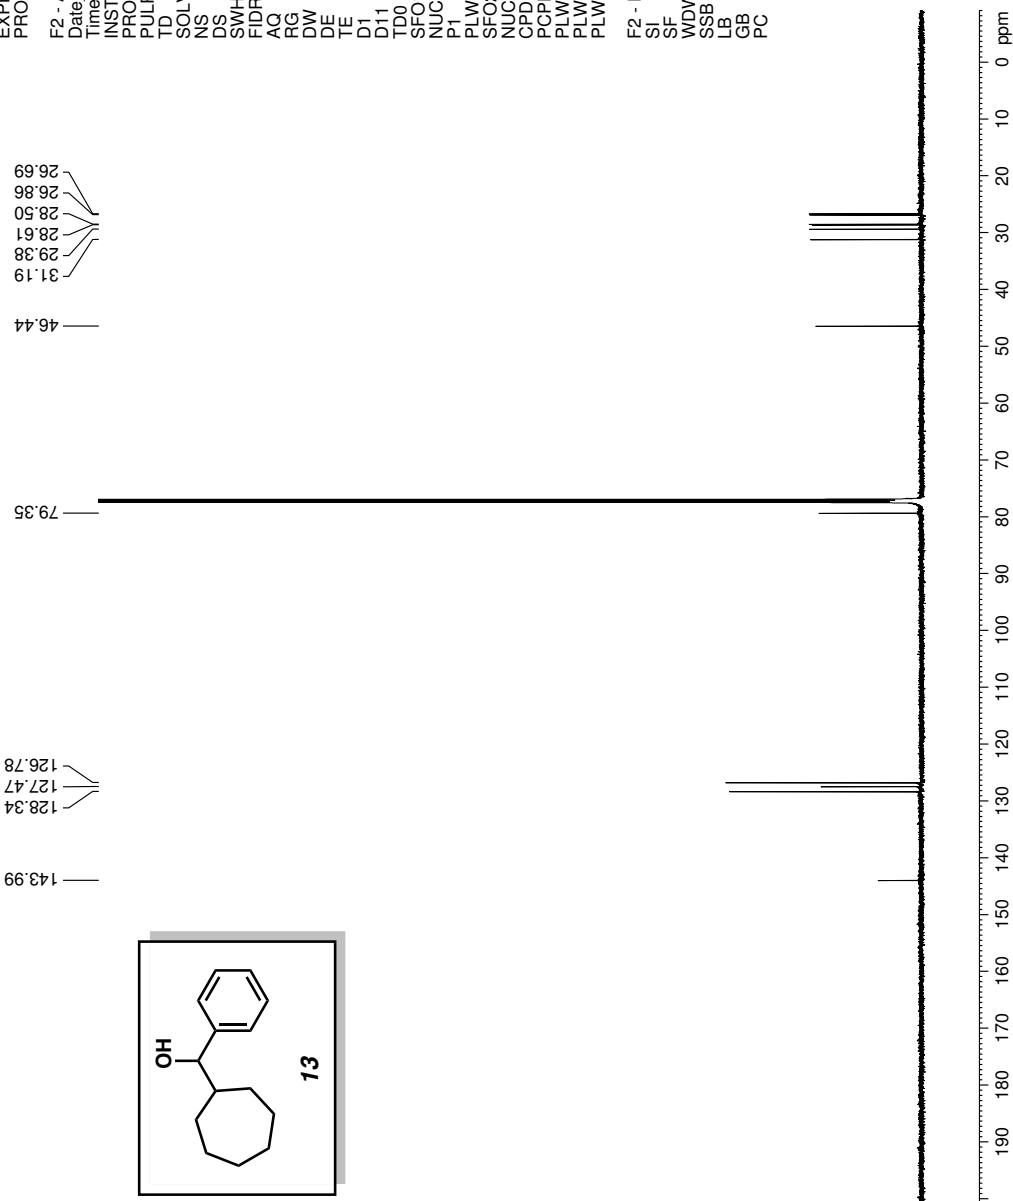

Current Data Parameters  
 NAME TBB-2020-072  
 EXPNO 211  
 PROCNO 1

F2 - Acquisition Parameters  
 Date\_ 20200715  
 Time\_ 17.54 h  
 INSTRUM av500  
 PROBHD Z119248\_0002 ( zgp930  
 PULPROG zgpg30  
 TD 65536  
 SOLVENT CDCI3  
 NS 96  
 DS 2  
 SWH 31250.000 Hz  
 FIDRES 0.953674 Hz  
 AQ 1.0485760 sec  
 RG 204.54  
 DW 16.000 usec  
 DE 28.000 usec  
 TE 298.0 K  
 D1 2.0000000 sec  
 D11 0.0300000 sec  
 TD0 1  
 SFO1 125.772511 MHz  
 NUC1 13C  
 P1 10.50 usec  
 PLW1 23.0000000 W  
 SFO2 500.1330008 MHz  
 NUC2 1H  
 CPDPRG2 waltz16  
 PCPD2 80.00 usec  
 PLW2 13.5000000 W  
 PLW12 0.2109400 W  
 PLW13 0.1061000 W

F2 - Processing parameters  
 SI 131072  
 SF 125.7577724 MHz  
 WDW EM  
 SSB 0  
 LB 1.00 Hz  
 GB 0  
 PC 1.40

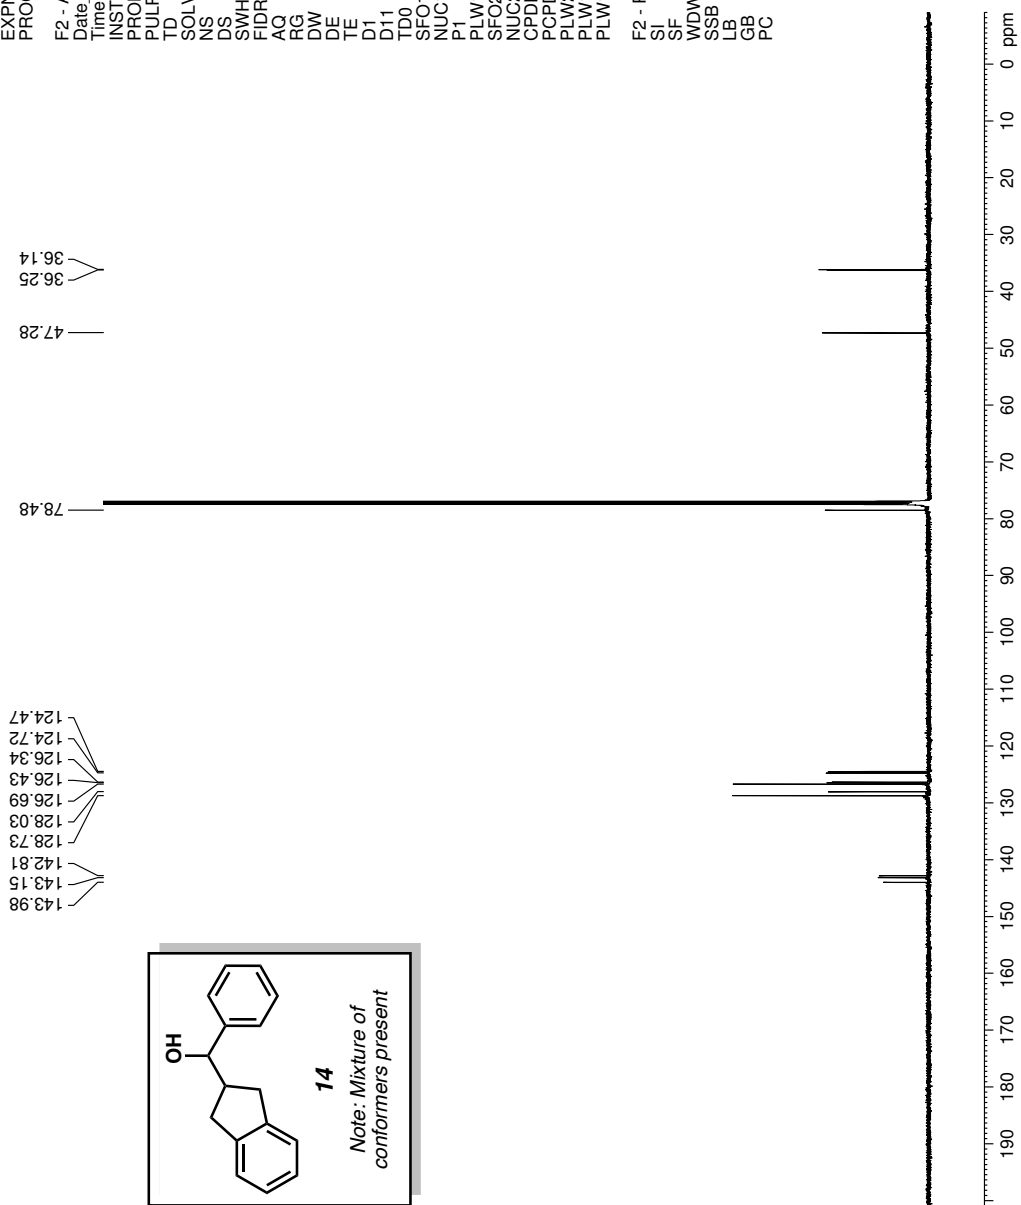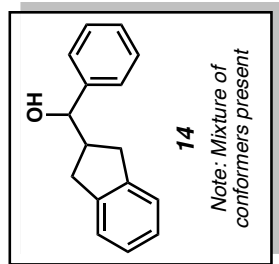

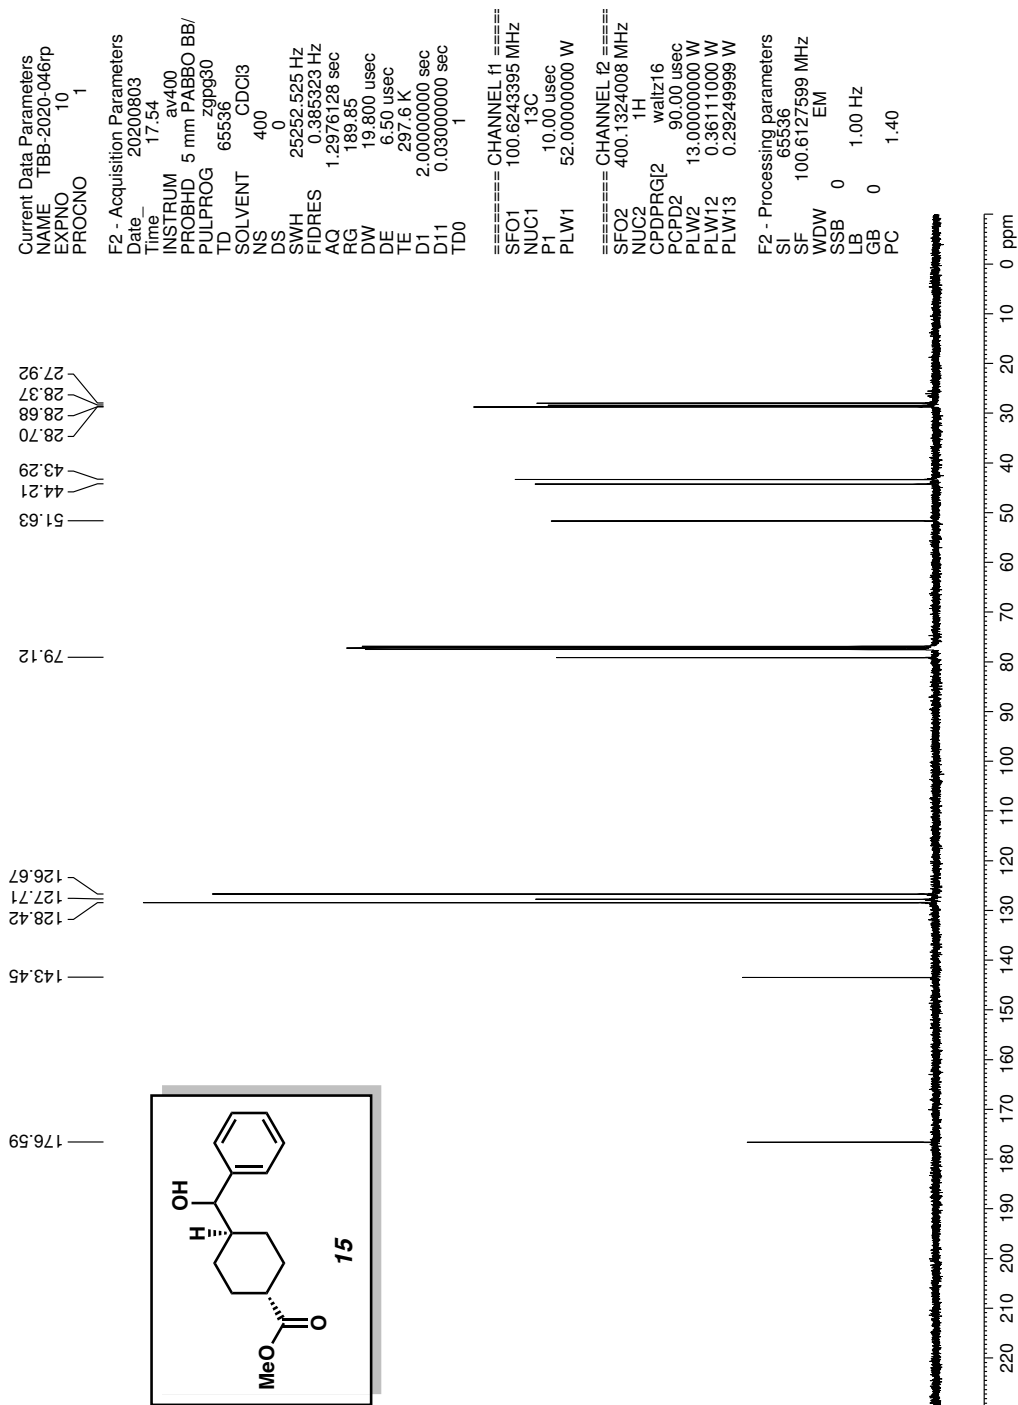

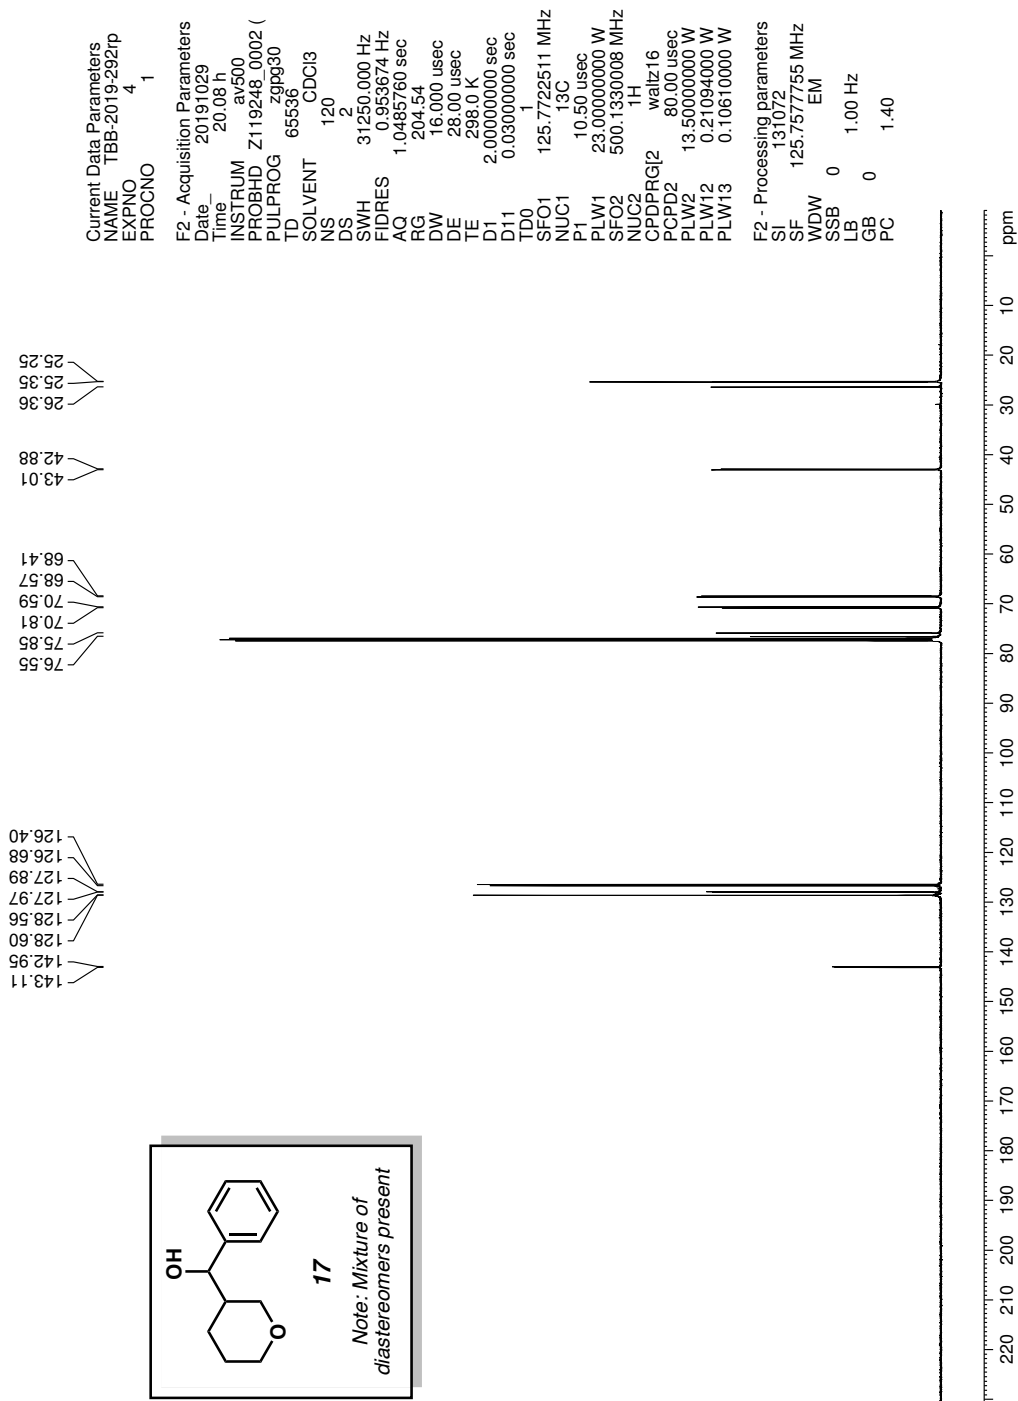



Current Data Parameters  
 NAME TBB-2019-322ip  
 EXPNO 4  
 PROCNO 1

F2 - Acquisition Parameters  
 Date\_ 20200903  
 Time 19.54 h  
 INSTRUM av500  
 PROBHD Z119248\_0002 (  
 PULPROG zgpg30  
 TD 65536  
 SOLVENT CDCl3  
 NS 536  
 DS 2  
 SWH 31250.000 Hz  
 FIDRES 0.953674 Hz  
 AQ 1.0485760 sec  
 RG 204.54  
 DW 16.000 usec  
 DE 28.000 usec  
 TE 298.0 K  
 D1 2.0000000 sec  
 D11 0.03000000 sec  
 TD0 1  
 SFO1 125.7722511 MHz  
 NUC1 13C  
 P1 10.50 usec  
 PLW1 23.0000000 W  
 SFO2 500.1330008 MHz  
 NUC2 1H  
 CPDPRG2 waltz16  
 PCPD2 80.00 usec  
 PLW2 13.5000000 W  
 PLW12 0.21094000 W  
 PLW13 0.10610000 W

F2 - Processing parameters  
 SI 131072  
 SF 125.7577733 MHz  
 WDW EM  
 SSB 0  
 LB 1.00 Hz  
 GB 0  
 PC 1.40

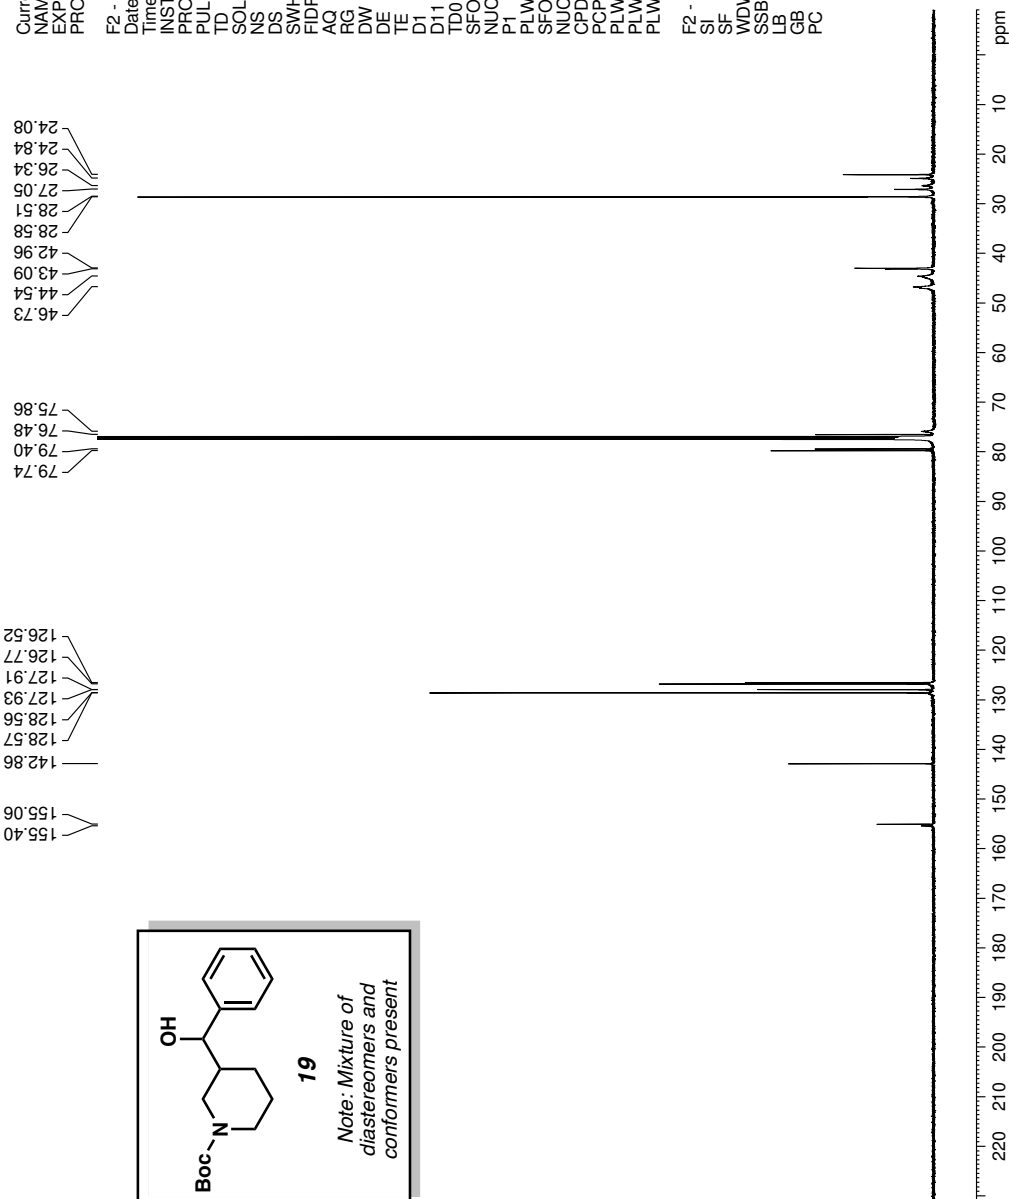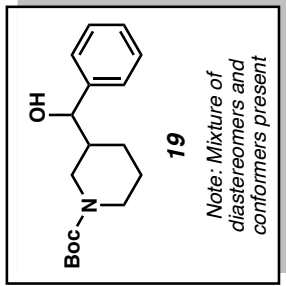

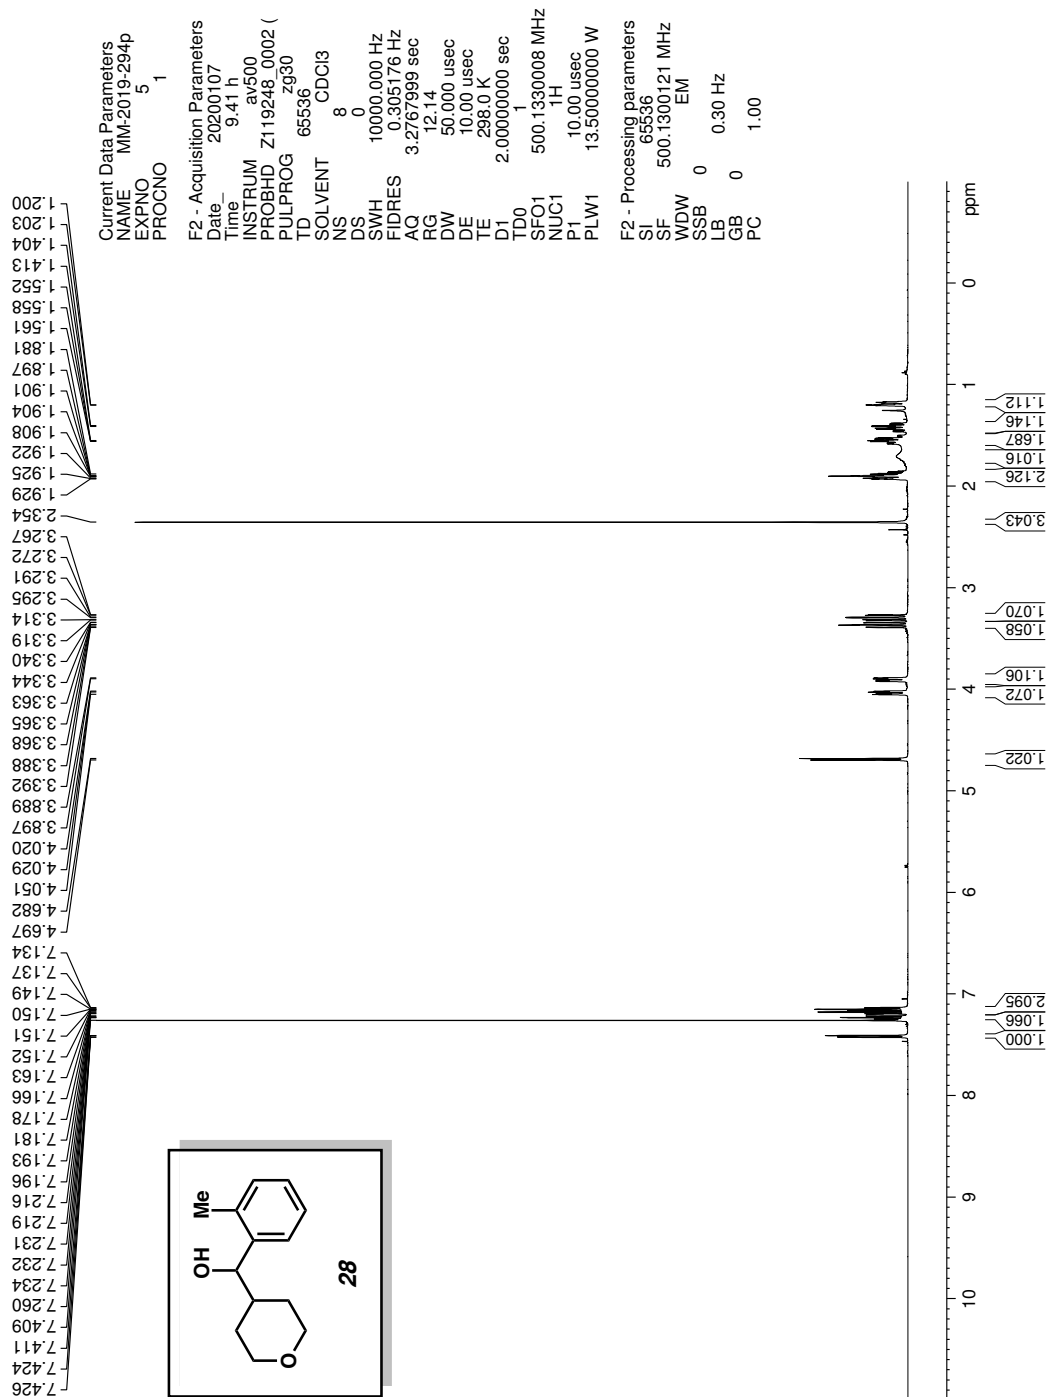

```

Current Data Parameters
NAME MM-2019-292p
EXPNO 180
PROCNO 1

F2 - Acquisition Parameters
Date_ 20191204
Time 16.38
INSTRUM av400
PROBHD 5 mm PABBO BB/
PULPROG zgpg30
TD 65536
SOLVENT CDCI3
NS 512
DS 0
SWH 25252.525 Hz
FIDRES 0.385323 Hz
AQ 1.2976128 sec
RG 189.85
DW 19.800 usec
DE 6.50 usec
TE 296.7 K
D1 2.00000000 sec
D11 0.03000000 sec
TD0 1

===== CHANNEL f1 =====
SFO1 100.6243395 MHz
NUC1 13C
P1 10.00 usec
PLW1 52.00000000 W

===== CHANNEL f2 =====
SFO2 400.1324008 MHz
NUC2 1H
CPDPRG2 waltz16
PCPD2 90.00 usec
PLW2 13.00000000 W
PLW12 0.36111000 W
PLW13 0.29249999 W

F2 - Processing parameters
SI 65536
SF 100.6127575 MHz
WDW EM
SSB 0
LB 1.00 Hz
GB 0
PC 1.40
    
```

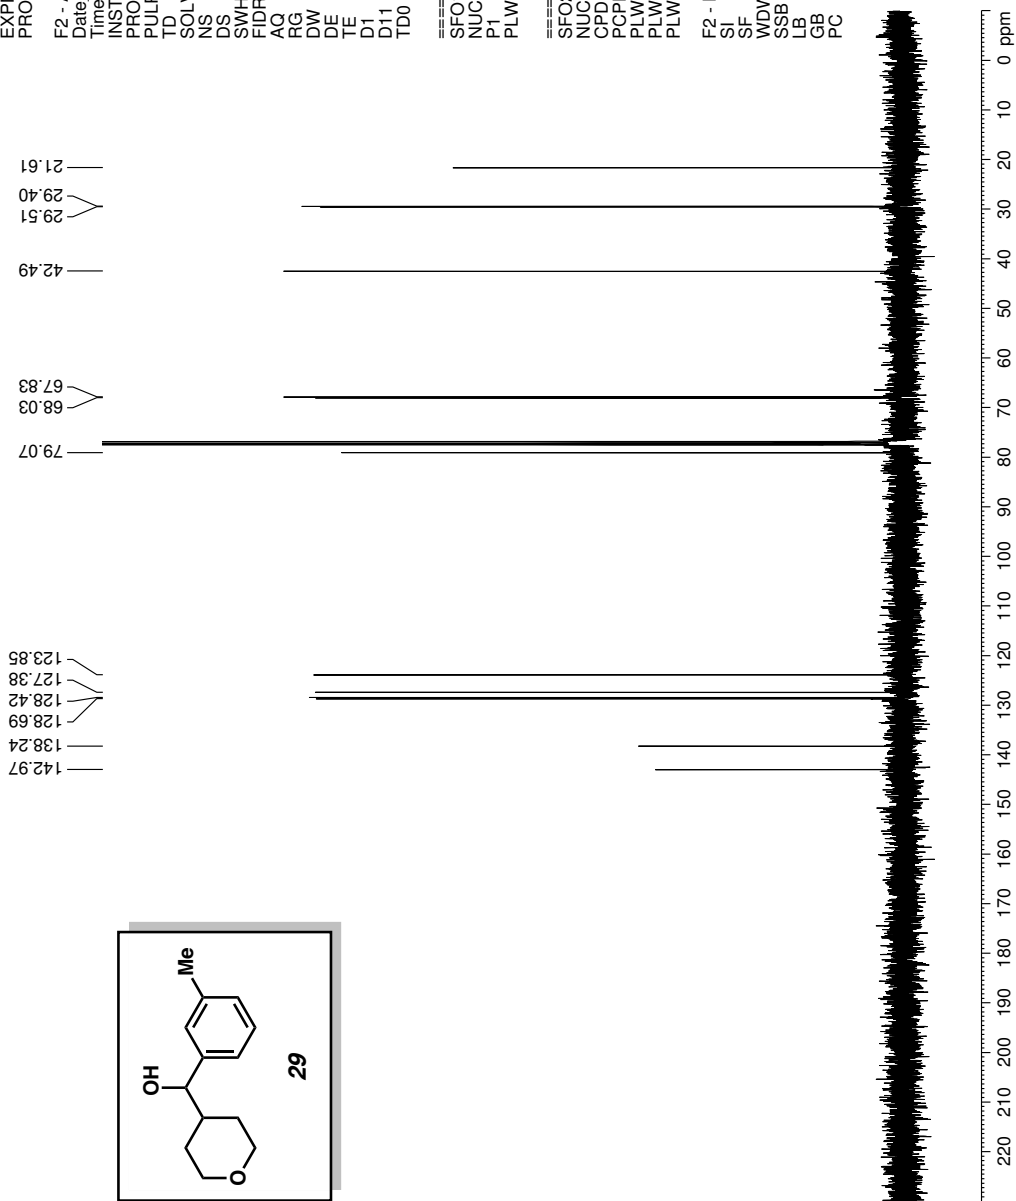

Current Data Parameters  
 NAME MM-2019-286p  
 EXPNO 5  
 PROCNO 1

F2 - Acquisition Parameters  
 Date\_ 20191127  
 Time 10.14 h  
 INSTRUM av500  
 PROBHD Z119248\_0002 (  
 PULPROG zgpg30  
 TD 65536  
 SOLVENT CDCl3  
 NS 184  
 DS 2  
 SWH 31250.000 Hz  
 FIDRES 0.953674 Hz  
 AQ 1.0485760 sec  
 RG 204.54  
 DW 16.000 usec  
 DE 28.00 usec  
 TE 298.0 K  
 D1 2.00000000 sec  
 D11 0.03000000 sec  
 TD0 1  
 SFO1 125.7722511 MHz  
 NUC1 13C  
 P1 10.50 usec  
 PLW1 23.0000000 W  
 SFO2 500.1330008 MHz  
 NUC2 1H  
 CPDPRG2 waltz16  
 PCPD2 80.00 usec  
 PLW2 13.5000000 W  
 PLW12 0.21094000 W  
 PLW13 0.10610000 W

F2 - Processing parameters  
 SI 131072  
 SF 125.7577751 MHz  
 WDW EM  
 SSB 0  
 LB 1.00 Hz  
 GB 0  
 PC 1.40

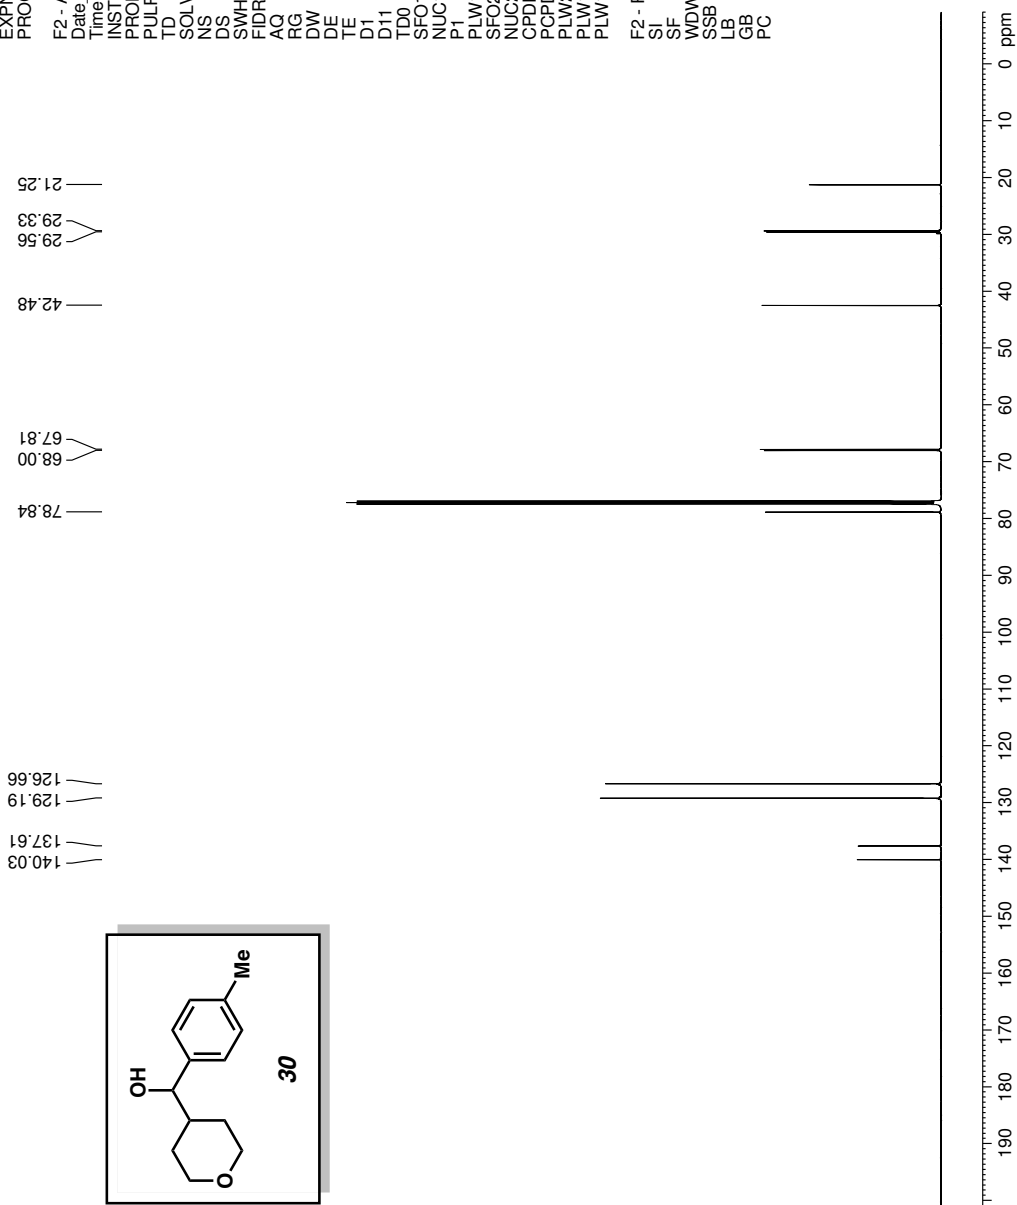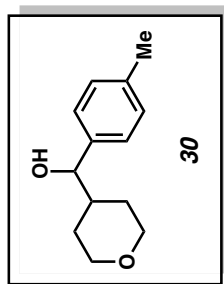

Current Data Parameters  
 NAME MM-2020-051p  
 EXPNO 4  
 PROCNO 1

F2 - Acquisition Parameters  
 Date\_ 20200301  
 Time 15.26 h  
 INSTRUM av500  
 PROBHD Z119248\_0002 (  
 PULPROG zgpg30  
 TD 65536  
 SOLVENT CDCI3  
 NS 152  
 DS 2  
 SWH 31250.000 Hz  
 FIDRES 0.953674 Hz  
 AQ 1.0485760 sec  
 RG 204.54  
 DW 16.000 usec  
 DE 28.00 usec  
 TE 298.0 K  
 D1 2.00000000 sec  
 D11 0.03000000 sec  
 TD0 1  
 SFO1 125.7722511 MHz  
 NUC1 <sup>13</sup>C  
 P1 10.50 usec  
 PLW1 23.00000000 W  
 SFO2 500.1330008 MHz  
 NUC2 <sup>1</sup>H  
 CPDPRG2 waltz16  
 PCPD2 80.00 usec  
 PLW2 13.50000000 W  
 PLW12 0.21094000 W  
 PLW13 0.10610000 W

F2 - Processing parameters  
 SI 131072  
 SF 125.7577739 MHz  
 WDW 0  
 SSB 0  
 LB 1.00 Hz  
 GB 0  
 PC 1.40

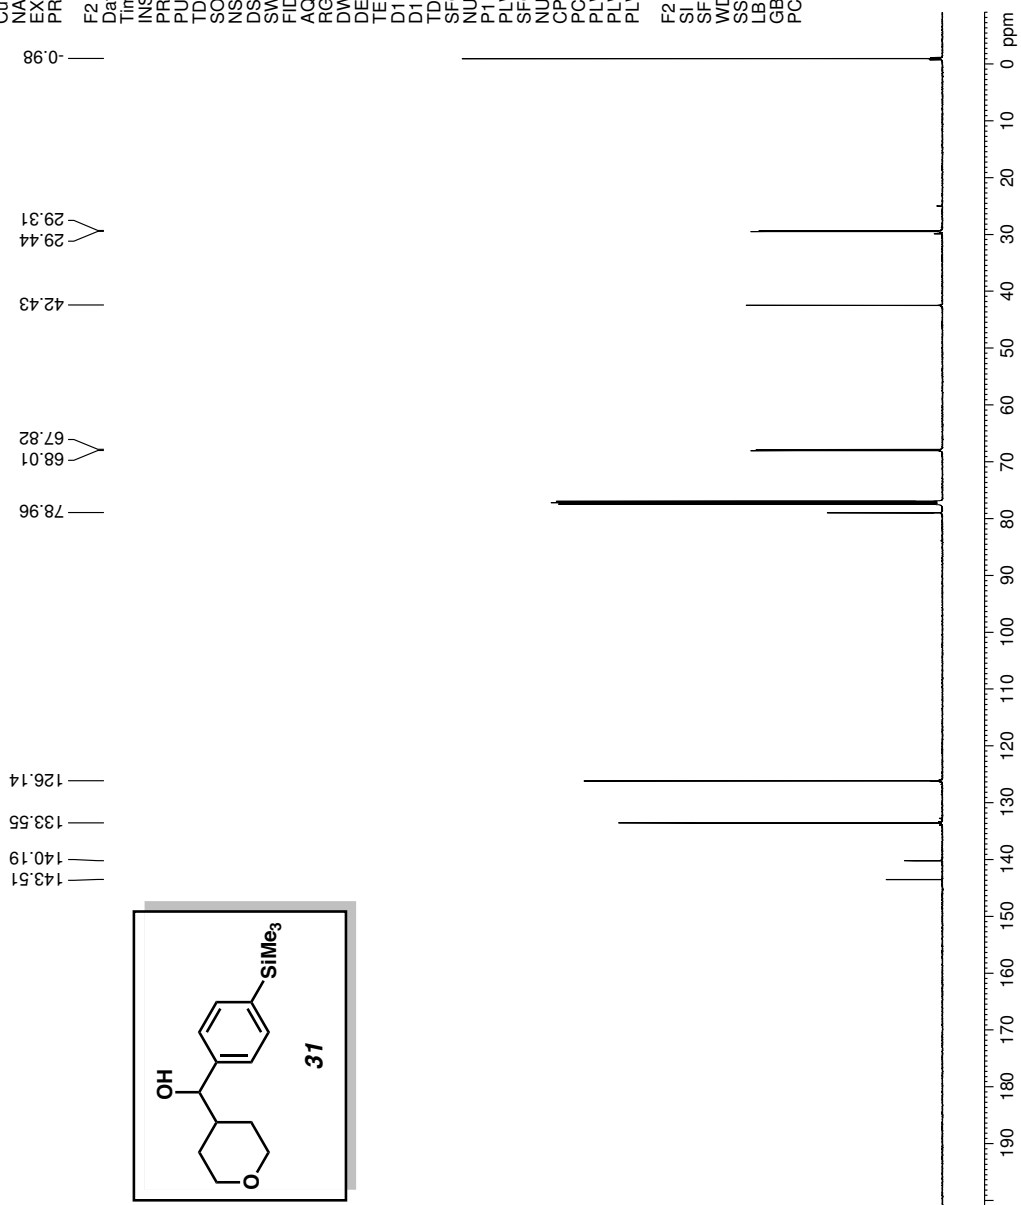

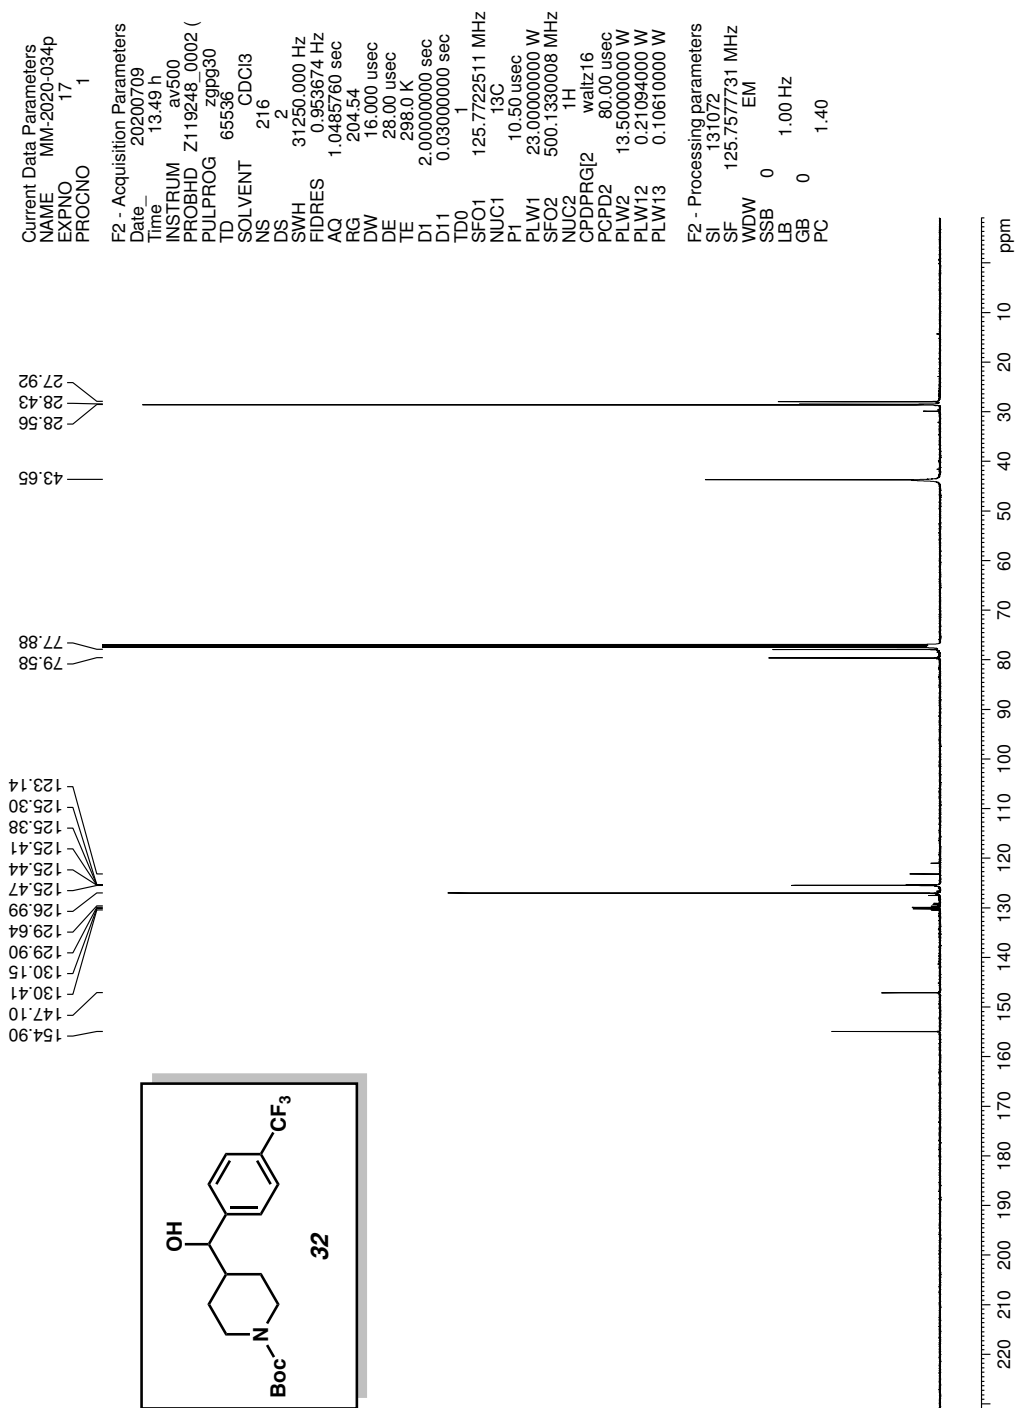

Current Data Parameters  
 NAME MM-2020-035p  
 EXPNO 9  
 PROCNO 1  
 F2 - Acquisition Parameters  
 Date\_ 20200216  
 Time 19.27 h  
 INSTRUM av500  
 PROBHD Z119248\_0002 (zpgg30)  
 PULPROG zpgg30  
 TD 65536  
 SOLVENT CDCl3  
 NS 56  
 DS 2  
 SWH 31250.000 Hz  
 FIDRES 0.953674 Hz  
 AQ 1.0485760 sec  
 RG 204.54  
 DW 16.000 usec  
 DE 28.00 usec  
 TE 298.0 K  
 D1 2.00000000 sec  
 D11 0.03000000 sec  
 TD0 1  
 SFO1 125.7722511 MHz  
 NUC1 13C  
 P1 10.50 usec  
 PLW1 23.00000000 W  
 SFO2 500.1330008 MHz  
 NUC2 1H  
 CPDPRG2 waltz16  
 PCPD2 80.00 usec  
 PLW2 13.50000000 W  
 PLW12 0.21094000 W  
 PLW13 0.10610000 W  
 F2 - Processing parameters  
 SI 131072  
 SF 125.7577745 MHz  
 WDW EM  
 SSB 0  
 LB 1.00 Hz  
 GB 0  
 PC 1.40

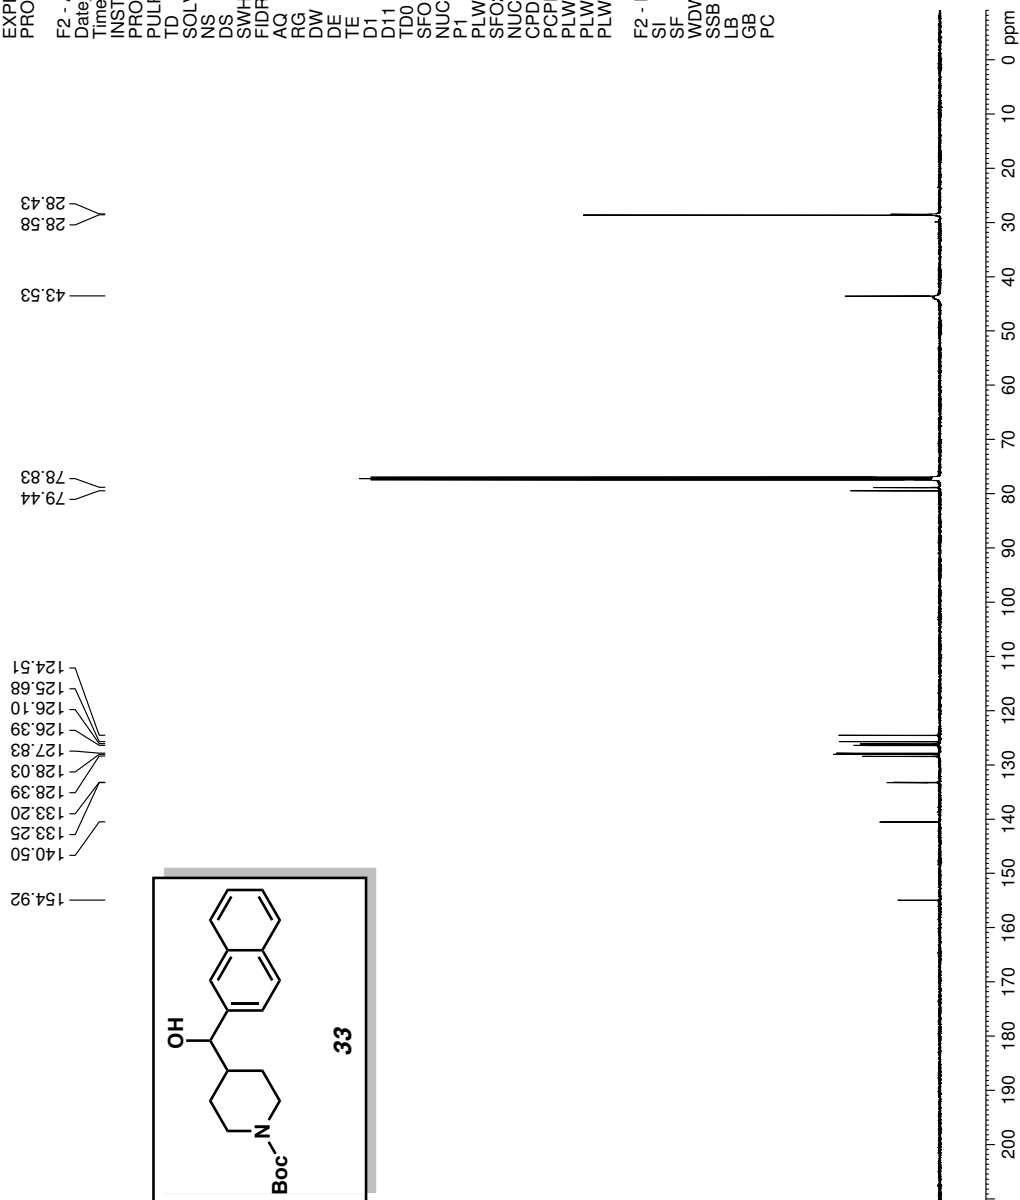

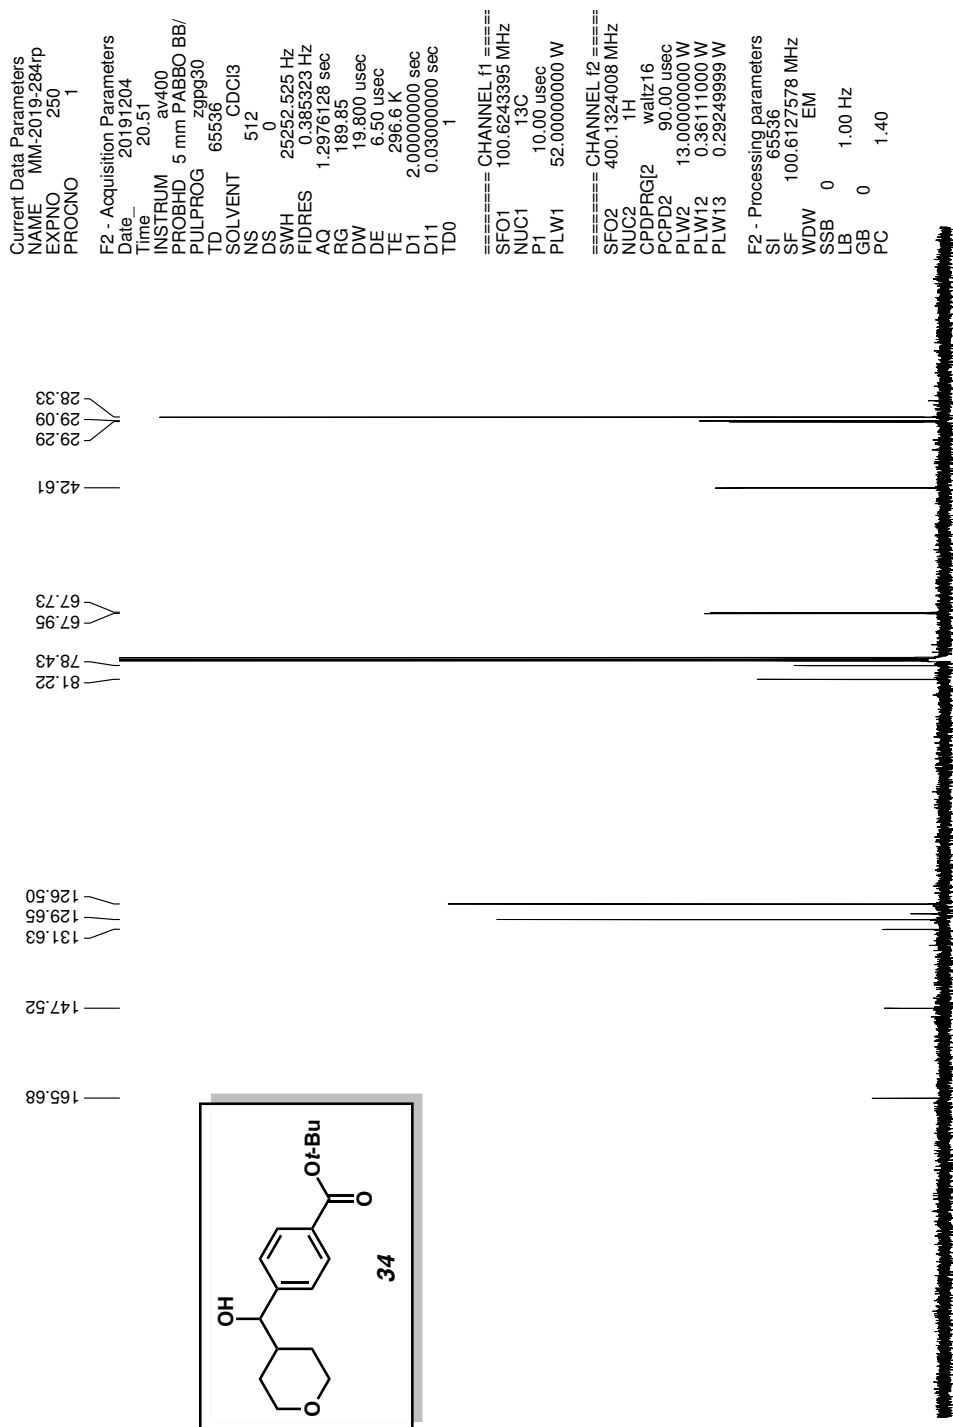



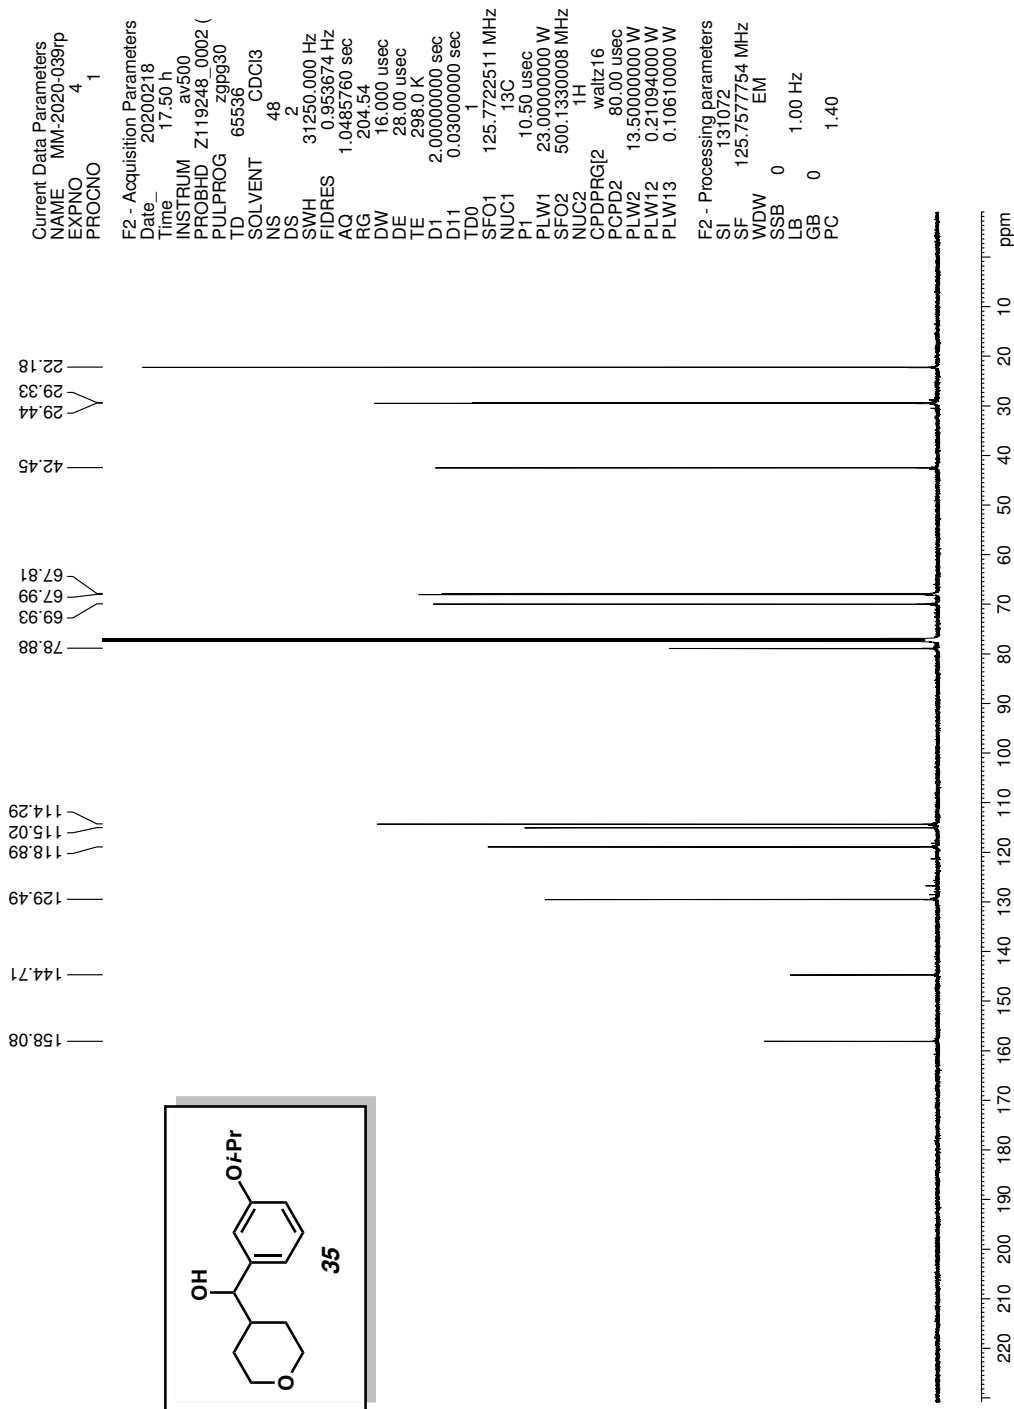

Current Data Parameters  
 NAME MM-2020-065rrp  
 EXPNO 13  
 PROCNO 1

F2 - Acquisition Parameters  
 Date\_ 20200315  
 Time 20.17 h  
 INSTRUM av500  
 PROBHD Z119248\_0002 (  
 PULPROG zgpg30  
 TD 65536  
 SOLVENT CDCl3  
 NS 88  
 DS 2  
 SWH 31250.000 Hz  
 FIDRES 0.953674 Hz  
 AQ 1.0485760 sec  
 RG 204.54  
 DW 16.000 usec  
 DE 28.00 usec  
 TE 298.0 K  
 D1 2.00000000 sec  
 D11 0.03000000 sec  
 TD0 1  
 SFO1 125.7722511 MHz  
 NUC1 13C  
 P1 10.50 usec  
 PLW1 23.0000000 W  
 SFO2 500.1330008 MHz  
 NUC2 1H  
 CPDPRG2 waltz16  
 PCPD2 80.00 usec  
 PLW2 13.5000000 W  
 PLW12 0.21094000 W  
 PLW13 0.10610000 W

F2 - Processing parameters  
 SI 131072  
 SF 125.7577734 MHz  
 WDW EM  
 SSB 0  
 LB 1.00 Hz  
 GB 0  
 PC 1.40

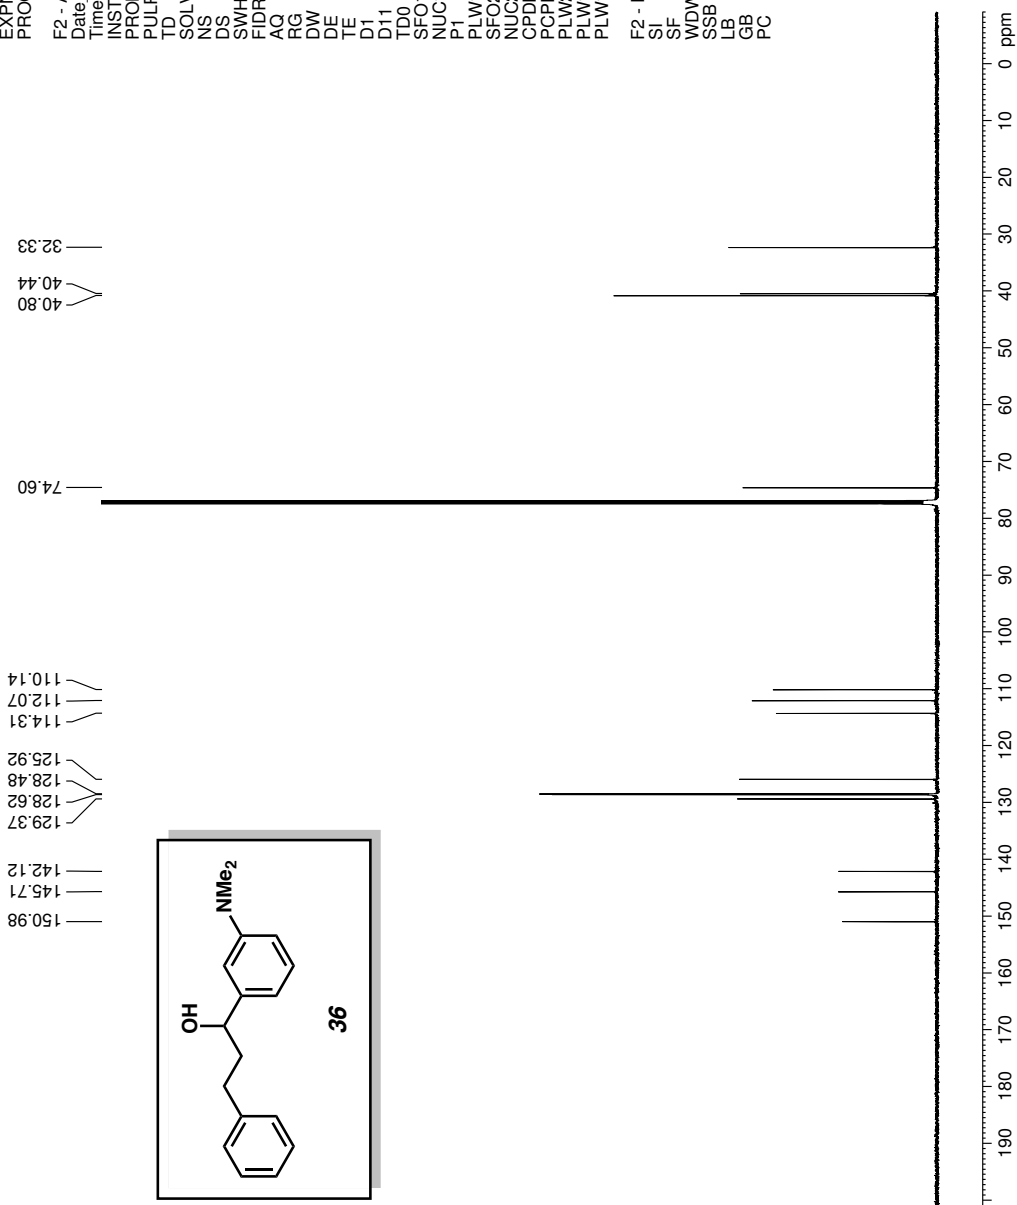

Current Data Parameters  
 NAME MI-2019-240p  
 EXPNO 13  
 PROCNO 1

F2 - Acquisition Parameters  
 Date\_ 20200315  
 Time\_ 20.04 h  
 INSTRUM av500  
 PROBHD Z119248\_0002 (  
 PULPROG zgpg30  
 TD 65536  
 SOLVENT CDC13  
 NS 88  
 DS 2  
 SWH 31250.000 Hz  
 FIDRES 0.953674 Hz  
 AQ 1.0485760 sec  
 RG 204.54  
 DW 16.000 usec  
 DE 28.000 usec  
 TE 298.0 K  
 D1 2.00000000 sec  
 D11 0.03000000 sec  
 TD0 1  
 SFO1 125.7722511 MHz  
 NUC1 13C  
 P1 10.50 usec  
 PLW1 23.00000000 W  
 SFO2 500.1330008 MHz  
 NUC2 1H  
 CPDPRG2 walz16  
 PCPD2 80.00 usec  
 PLW2 13.50000000 W  
 PLW12 0.21094000 W  
 PLW13 0.10610000 W

F2 - Processing parameters  
 SI 131072  
 SF 125.7577740 MHz  
 WDW EM  
 SSB 0  
 LB 1.00 Hz  
 GB 0  
 PC 1.40

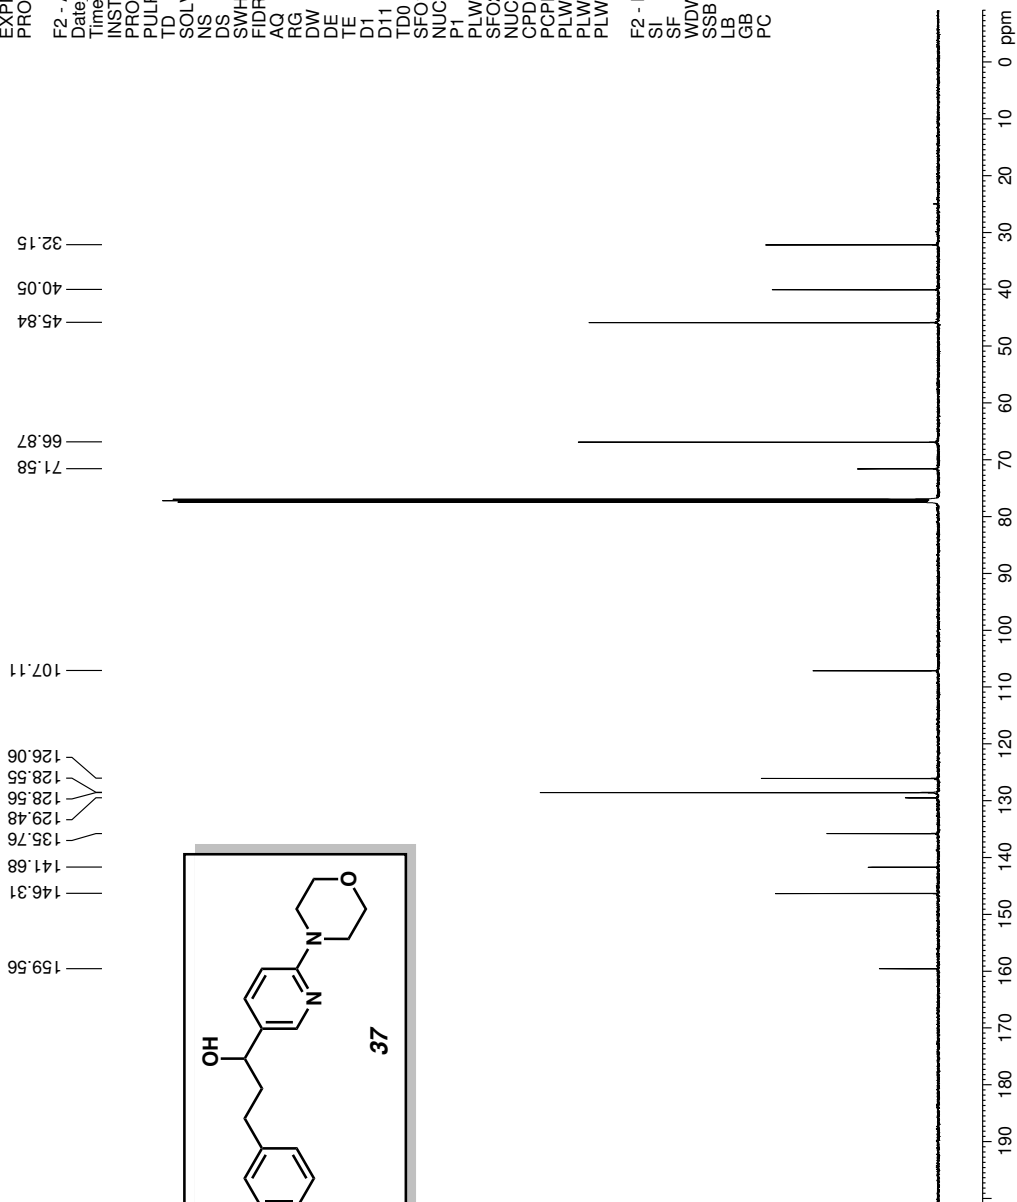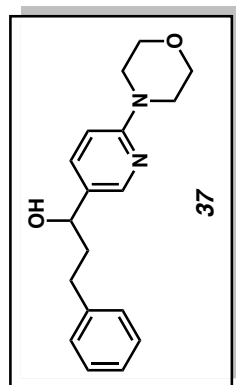

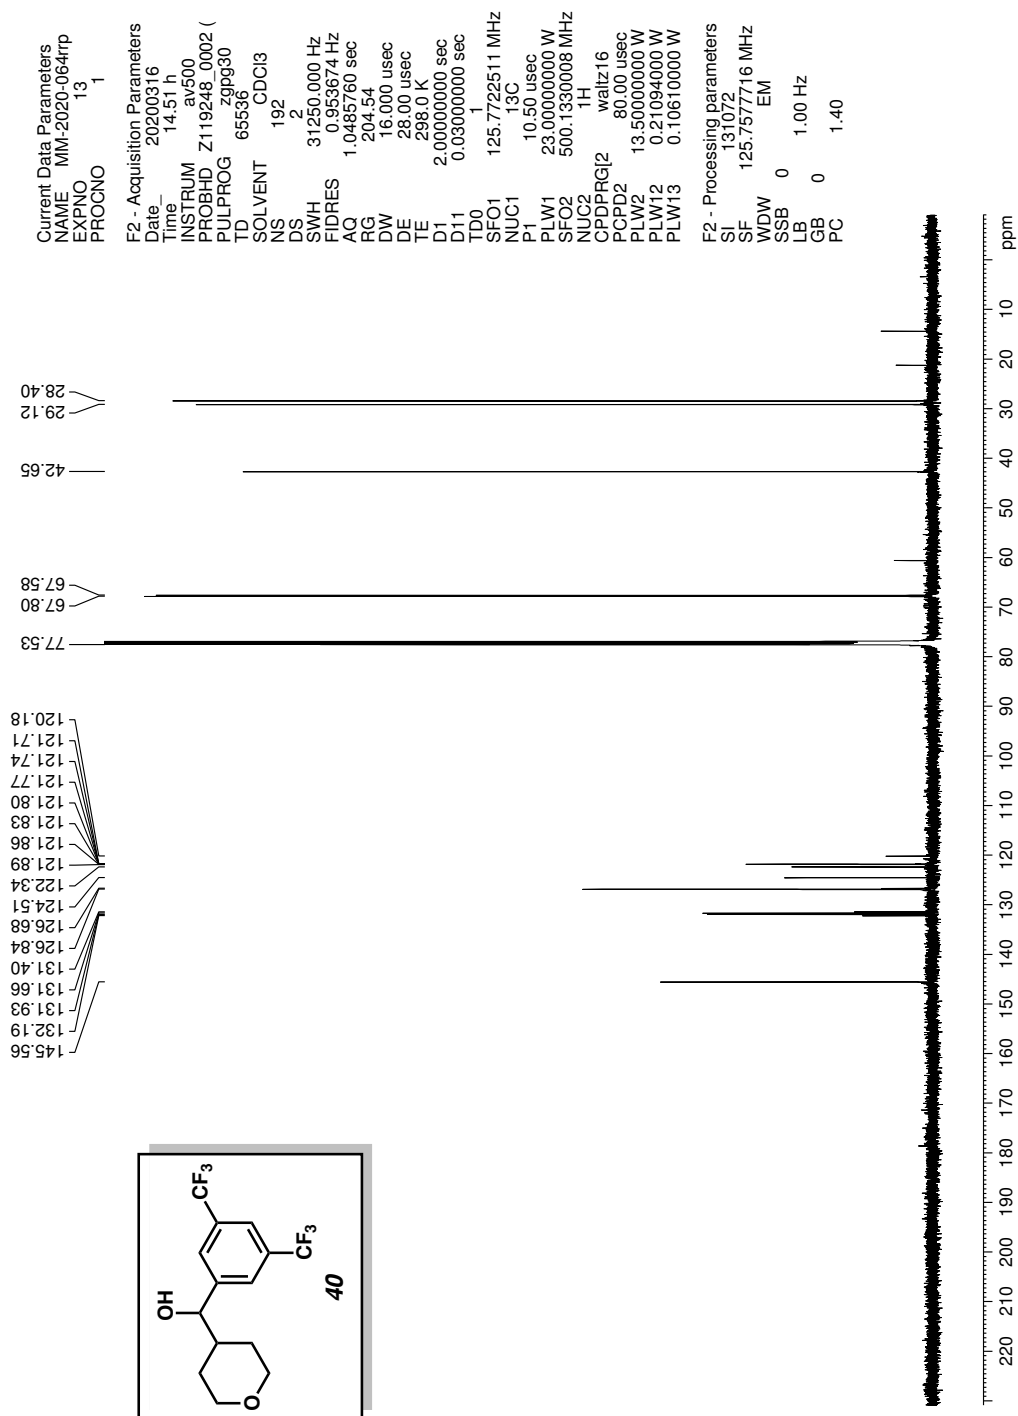

Supplement: NIHMS1640843-supplement-sup_01.pdf [file NIHMS1640843-supplement-sup_01.pdf]
